# Supplementary material
Source: PubMed Central journal article supplement (PMC5346335)
Supplement: NIHMS819775-supplement-1.pdf [file NIHMS819775-supplement-1.pdf]

## Striatal H3K27 Acetylation Linked to Glutamatergic Gene Dysregulation in Human Heroin Abusers Holds Promise as Therapeutic Target

### *Supplement 1*

#### **Supplemental Methods**

*Rodent heroin self-administration.* Adult male Long-Evans rats were maintained on reversed 12 hr dark/light cycle and underwent jugular vein catheterization. They were subsequently food-restricted and trained to self-administer heroin via the jugular catheter. Animals were placed in an operant chamber (29.5cm x 32.5cm x 23.5cm) housed in sound-attenuating boxes (MED Associates Inc., St. Albans, VT) with two levers; depression of one (designated the active lever) resulted in the delivery of 30  $\mu\text{g}/\text{kg}$  heroin under a fixed-ratio 1 (FR1) schedule of reinforcement, whereas depression of the other (designated the inactive lever) had no programmed consequences. Each self-administration session was 3hrs. Following 7 FR1 sessions, animals underwent 4 additional FR5 sessions and were fed ad libitum for the remainder of the study. For the JQ1 experiments, only rats that differentiated between active and inactive levers and showed an escalation of correct responses under FR5 schedule were selected for study. Two guide cannulae (C317G-SPC, cut 4 mm below pedestal), one into each hemisphere, were inserted into the rostral part of the dorsal striatum (at a 10° angle from midline relative to bregma: AP+1.7mm, ML+3.5mm; DV-2.0mm; **Supplemental Figure S2**). After establishing a post-surgery baseline (average of two days), 2  $\mu\text{l}$  of 20  $\mu\text{mol}/\text{l}$  JQ1 was injected in awake animals 5 minutes before heroin self-administration testing on two consecutive days. To test for potential protracted effects of JQ1, animals underwent 3 additional heroin self-administration sessions 24 hours, 48 hours, and 96 hours after the last JQ1 delivery. To test JQ1's effect on drug-seeking behavior, the last heroin self-administration was followed by a 96 hours abstinent

period, then animals were injected with JQ1 and underwent a non-reinforced cue-induced drug-seeking reinstatement session. The reinstatement session was 1hr long. All testing was carried out using a counter-balanced experimental design and conducted at a similar time of the day.

*Microarray.* Messenger RNA (mRNA) microarray was previously conducted (1) on total RNA isolated from the NAc of a subset of of heroin ( $n = 22$ ; 19 male and 3 female subjects) and control ( $n = 27$ ; 22 male and 5 female subjects) subjects (**Supplemental Tables S1 and S2** for demographic information). Expression data were collected using HG-U133A Affymetrix Chips (Affymetrix, Santa Clara, California) at the Purdue Pharma, L.P. (Cranbury, New Jersey). Raw data were normalized using the Robust Multichip Average from the Affymetrix Expression Console. To control for RNA quality, actin 3'/5' ratios of less than 3 and percent present calls of 50% or greater were used. To identify differentially expressed genes (DEGs), two-tailed  $t$  tests were performed with a multiple testing correction ( $p < .05$ ). Hierarchical clustering was performed on log<sub>2</sub> expression levels of DEGs with Euclidian distance and average linkage for constructing dendograms. For the weighted gene coexpression network analysis, Supplemental Figure S7 shows module correlations, Supplemental Table S6 shows significance levels, and Supplemental Table S7 shows module memberships.

*NanoString.* 20  $\mu$ m-thick ventral striatal sections were taken from 20 human heroin abusers and 16 matching controls, and submitted for NanoString analysis (NanoString, Seattle, WA, USA) in Ambion lysis buffer (Ambion, Austin, TX, USA). A custom codeset was designed for genes related to glutamatergic neurotransmission (*AKAP6*, *DLG1*, *DLG4*, *DLGAP2*, *DNM3*, *ERBB4*, *GLS*, *GRIA1*, *GRIA2*, *GRM3*, *GRM5*, *HOMER1*, *HOMER3*, *NRXN3*, *PICK1*), as well as a panel of chromatin remodeling enzymes (*AURKB*, *CHD9*, *HDAC5*, *JMJD1C*, *KAT5*, *KAT6B*, *NCOA1*, *NCOA3*, *SATB1*, *SETD2*, *SMYD2*, *SETD4*, *SETDB1*, *SUV39H1*, *SUV420H1*, *UBE2B*). Raw

counts for each gene were subjected to a technical normalization based on the counts for positive control probesets, followed by biological normalization using *GAPDH* as housekeeping gene. All normalization steps were carried out with the nSolver software (NanoString).

*Real-time quantitative polymerase chain reaction (qPCR).* mRNA was extracted from approximately 10 mg of pulverized putamen tissue using the RNAqueous Micro Kit (Ambion) and following the manufacturer's protocol. First-strand cDNA was synthesized using qScript cDNA SuperMix (Quanta Biosciences, Gaithersburg, MD, USA) and subjected to qPCR analysis using Taqman-based probes. Primers and probes against *GRIA1* (Hs00181348\_m1), *GRM5* (Hs00168275\_m1), *HOMER1* (Hs00188676\_m1), *DLG1* (Hs00938204\_m1), *DLG4* (Hs00176354\_m1), *NCOA1* (Hs00186661\_m1), *HDAC5* (Hs00608366\_m1), *SUV39H1* (Hs00957892\_m1) and *JMJD1C* (Hs00405469\_m1) were obtained from Applied Biosystems (Life Technologies, Carlsbad, CA, USA). Eukaryotic 18S rRNA (Applied Biosystems, product # 4319413E) was included in each multiplex PCR as an internal control. Real-time PCR and subsequent analysis were performed with a Roche LightCycler 480 Real-Time PCR system (LightCycler 480 software; Roche, Basel, Switzerland). Quantification of target gene expression in all samples, performed in triplicate, was normalized to 18S rRNA by the equation  $C_{T(\text{target})} - C_{T(18S)} = \Delta C_T$ , where  $C_T$  is the threshold cycle number. Differences between control and heroin subjects, including individual variation, were calculated by the equation  $\Delta C_{T(\text{individual subject})} - \Delta C_{T(\text{mean control})} = \Delta \Delta C_T$ . Changes in target gene expression (*n*-fold) in each sample were calculated by  $2^{-(\Delta \Delta C_T)}$  from which the means and standard errors of the mean (SEM) were derived.

*Western blot.* Approximately 15 mg of pulverized dorsal striatum (putamen) punches per subject were used to generate histone extracts using 100 $\mu$ l 0.2N HCl containing protease (cComplete Mini, EDTA-free protease inhibitor cocktail, Roche) and phosphatase inhibitors (Halt phosphatase inhibitor cocktail, Thermo Scientific, Rockford, IL, USA) and 5mmol/L Na-butyrate.

The protein was diluted in Laemmli buffer, denatured (for 5 min at 95°C), subjected to electrophoresis, and transferred onto nitrocellulose membranes. The membranes were blocked in Odyssey blocking buffer (LI-COR, Lincoln, NE, USA) and incubated at 4°C overnight with primary antibodies. Rabbit polyclonal antibodies were used against acetyl-histone H3 (pan-AcH3, 1:5000, Millipore, Billerica, MA, USA), acetyl K9-histone H3 (H3K9ac, 1:500 Abcam, Cambridge, MA, USA), acetyl K14-histone H3 (H3K14ac, 1:2000, Active Motif, Carlsbad, CA, USA), acetyl K18-histone H3 (H3K18Ac, 1:6000, Abcam), acetyl K23-histone H3 (H3K23ac, 1:5000, Active Motif), acetyl K27-histone H3 (H3K27ac, 1:1000, Millipore), acetyl K36-histone H3 (H3K36ac, 1:5000, Millipore), acetyl K56-histone H3 (H3K56ac, 1:400, Millipore) trimethyl K9-histone H3 (H3K9me3, 1:1000, Abcam), trimethyl K4-histone H3 (H3K4me3, 1:2000, Millipore), trimethyl K27-histone H3 (H3K17me3, 1:3000, Millipore), and histone H4 (H4, 1:10000, Millipore). Mouse monoclonal antibodies were used against dimethyl K9-histone H3 (H3K9me2, 1:1000, Abcam), and histone H4 (H4, 1:10000, Abcam). Membranes were subsequently incubated with goat anti-rabbit or goat anti-mouse IRDye 680 or IRDye 800 secondary antibodies (LI-COR) at room temperature for 1h. Membranes were developed with the LI-COR infrared imaging system (LI-COR) and images quantified using average integrated density values. Total histone H4 levels were used to control for total protein content.

*Chromatin immunoprecipitation (ChIP).* ChIP was carried out as previously described (1). Briefly, 15 mg pulverized putamen tissue (human or rat) was fixed with 1% formaldehyde. Samples were sonicated with Bioruptor (Diagenode, Liege, Belgium) in buffer containing 50 mmol/L Hepes pH 7.9, 140 mmol/L NaCl, 1 mmol/L EDTA, 1% Triton X-100, 0.1% Nadeoxycholate, and 0.1% SDS. 25 µg chromatin (measured as DNA at an optical density of 260 nm with NanoDrop ND-1000 Spectrophotometer from Thermo Scientific) was immunoprecipitated with 4 µl anti-acetyl histone H3 antibody (Millipore) or 4 µg anti-acetyl

lysine-27 histone H3 antibody (Millipore) and nonspecific rabbit IgG (Santa Cruz Biotechnology, Santa Cruz, CA, USA). Immunocomplexes were collected with protein G Dynabeads (Invitrogen, Carlsbad, CA, USA), beads washed, bound fraction eluted, extracted with phenol-chloroform, ethanol-precipitated, and resuspended in Tris-EDTA buffer. CHIP material was analyzed by real-time PCR using SYBR green master mix (Roche) in a LightCycler 480 instrument (Roche) and the default SYBR green PCR program. PCR reactions were carried out in triplicates. Crossing point values from each PCR were obtained with the second derivative maximum method (Roche). The enrichment of a given target sequence precipitated by the antibody was determined as the difference between the amount of target sequence in the immunoprecipitated fraction and the amount of target sequence in the input DNA. Relative quantification and analysis of heroin effects were performed with a modified version of the  $\Delta\Delta C_t$  method. The background immunoprecipitation of chromatin with nonspecific rabbit IgG was determined for both groups.

*Fluorescence assisted cell sorting (FACS) of neuronal and non-neuronal nuclei.* 50mg of frozen postmortem brain tissue was homogenized in cold lysis buffer (0.32M Sucrose, 5 mM  $\text{CaCl}_2$ , 3 mM  $\text{Mg}(\text{Ac})_2$ , 0.1 mM EDTA, 10mM Tris-HCl, pH8, 1 mM DTT, 0.1% Triton X-100) and filtered through a 40 $\mu\text{m}$  cell strainer. The flow-through was underlaid with sucrose solution (1.8 M Sucrose, 3 mM  $\text{Mg}(\text{Ac})_2$ , 1 mM DTT, 10 mM Tris-HCl, pH8) and subjected to ultracentrifugation at 24,000 rpm for 1 hour at 4°C. Pellets were thoroughly resuspended in 500 $\mu\text{l}$  DPBS and incubated in BSA (final concentration 0.1%) and anti-NeuN antibody (1:1000, Alexa488 conjugated, Millipore) under rotation for 1 hour, at 4°C, in the dark. Prior to FANS sorting, DAPI (Thermoscientific) was added to a final concentration of 1 $\mu\text{g}/\text{ml}$ . DAPI positive neuronal (NeuN+) and non-neuronal (NeuN-) nuclei were sorted using a FACSAria flow cytometer (BD Biosciences).

*Generation of ATAC-seq libraries.* ATAC-seq (assay for transposase accessible chromatin) reactions were performed using an established protocol (2) (Illumina Cat #FC-121-1030) and the resulting libraries amplified using the Nextera index kit (Illumina Cat #FC-121-1011). Optimal library amplification was determined by visualization with Bioanalyzer High Sensitivity DNA Chips (Agilent technologies Cat#5067-4626). Libraries were amplified for a total of 12–17 cycles and were quantified by Qubit HS DNA kit (Life technologies) and by quantitative PCR (KAPA Biosystems Cat#KK4873) prior to sequencing. Finally, ATACseq libraries were sequenced on Hi-Seq2500 (Illumina) obtaining 2x50 paired-end reads.

*Statistical analysis.* Statistical evaluation was carried out using JMP (SAS Institute, Cary, NC, USA). Data were tested for normality and normalized by natural log transformation, if not normally distributed. Univariate statistical analyses were used to study the effect of each independent demographic variable (e.g. age, gender, postmortem interval, brain pH, RIN, years of heroin use, former overdose) and toxicology data (e.g. blood and urine alcohol, morphine, 6-mono-acetyl-morphine, codeine levels) on mRNA expression or protein levels. Variables with a p value of less than 0.1 were included in the final multiple regression model. If there were no such variables, group differences were determined by one-way analysis of variance. Correlational analyses were carried out according to Pearson.



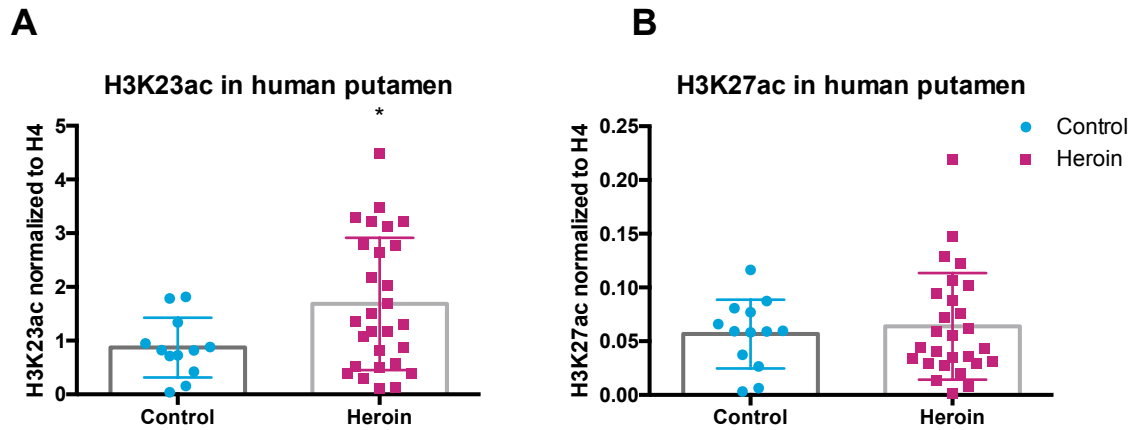

**Supplemental Figure S3.** Heroin-related acetylation impairments of specific histone H3 lysine residues in the post-mortem human brain. Western blot experiments showing (A) H3K23 acetylation,  $n=12$  (controls) and  $n=28$  (heroin users) and (B) H3K27 acetylation,  $n=13$  (controls) and  $n=27$  (heroin users) in the dorsal striatum. Data is represented as mean  $\pm$  s.e.m. Independent Student's  $t$ -tests,  $*P < 0.05$ .



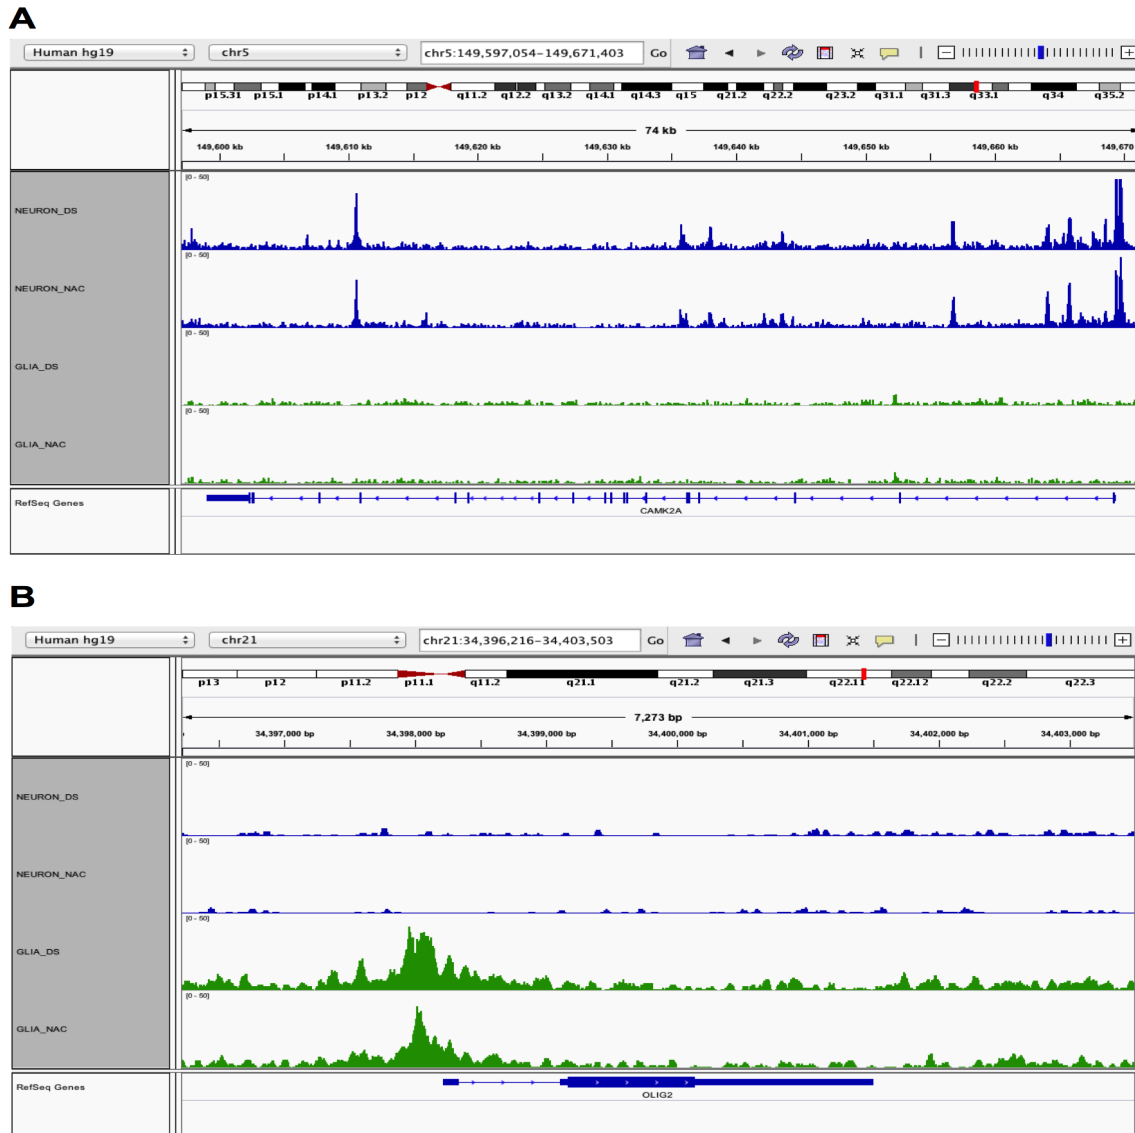

**Supplemental Figure S4.** Assay for transposase accessible chromatin (ATAC) coupled to fluorescence assisted cell sorting (FACS) reliably identifies open chromatin regions in a cell type-specific manner. (A) CAMK2A accessibility in neuronal (blue) and glial (green) tracks from human dorsal striatum (top panel) and nucleus accumbens (bottom panel) tissue. (B) OLIG2 accessibility in neuronal (blue) and glial (green) tracks from human dorsal striatum (top panel) and nucleus accumbens (bottom panel) tissue.

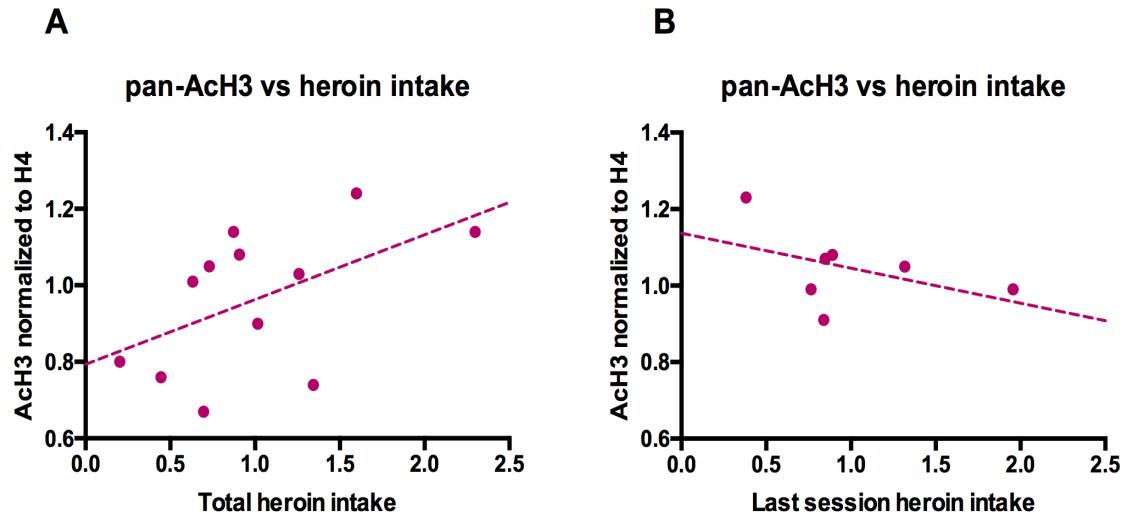

**Supplemental Figure S5.** Rat heroin-self administration is associated with changes in histone H3 acetylation similar to that in human heroin users (A,B) Pearson correlations between pan-AcH3 and (A) total heroin intake at 24 hours after the last self-administration session,  $r=0.52$ ,  $p=0.0847$ ,  $n=12$ , and (B) last session heroin intake 1 hour after the last self-administration session,  $r=-0.46$ ,  $p=0.3013$ ,  $n=7$ .

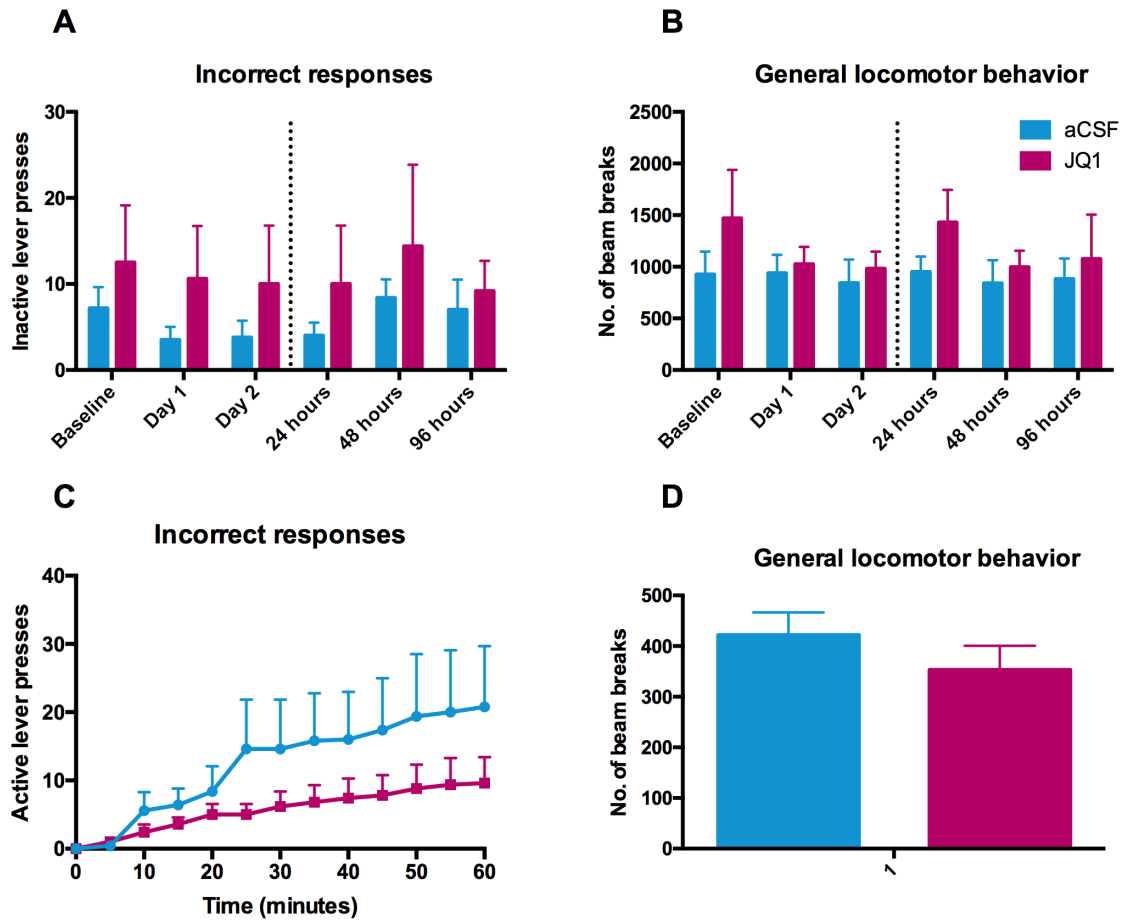

**Supplemental Figure S6.** JQ1 treatment does not affect inactive lever pressing and general locomotor behavior. (A) Inactive lever presses and (B) beam breaks during 3 hours long heroin self-administration session in JQ1 (n=6) and aCSF (n=5) treated Long-Evans rats. Dashed line represents day of last JQ1 delivery. Bar graphs represent mean  $\pm$  s.e.m. (c) Inactive lever presses and (d) beam breaks during a 1 hour non-reinforced cue-induced drug-seeking session in JQ1 (n=6) and aCSF (n=5) treated Long-Evans rats. Data is represented as mean  $\pm$  s.e.m.

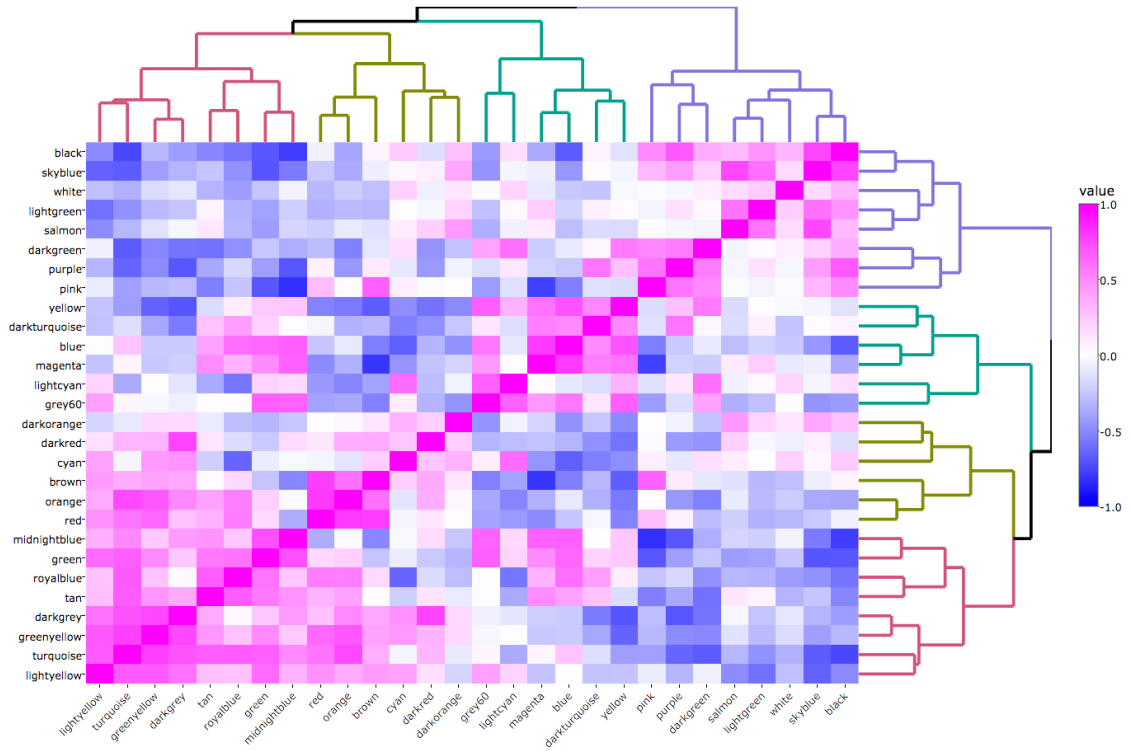

**Supplemental Figure S7.** WGCNA analysis. Heatmap plot showing Pearson's correlation of module eigengenes.

## Supplemental Tables

**Supplemental Table S1.** Demographic information (group, gender, age), cause of death (determined by forensic pathologist) brain pH, blood ethanol levels at autopsy for the post-mortem human population. For each subject, the molecular assays performed are indicated separately.

| ID  | Group   | Gender | Age | Cause of death                       | pH   | Blood EtOH | WB, PCR, ChIP | Micro-array | Nanostring | ATAC-seq | RNA-seq |
|-----|---------|--------|-----|--------------------------------------|------|------------|---------------|-------------|------------|----------|---------|
| 245 | Control | f      | 15  | sudden, natural (AMI)                |      | 0          |               | x           |            |          |         |
| 257 | Control | m      | 46  | sudden, natural (AMI)                | 6.84 | 0          |               | x           |            |          |         |
| 263 | Control | m      | 39  | sudden, natural (AMI)                |      | 4          |               | x           |            |          |         |
| 275 | Control | m      | 46  | sudden, natural (AMI)                |      | 0          |               | x           |            |          |         |
| 285 | Control | m      | 44  | sudden, natural (AMI)                | 6.92 | 0          |               | x           | x          |          |         |
| 288 | Control | m      | 49  | sudden, natural (AMI)                | 6.59 | 0          |               | x           | x          |          |         |
| 307 | Control | m      | 43  | sudden, natural (pulmonary embolism) | 6.68 | 0          | x             | x           | x          |          |         |
| 317 | Control | m      | 50  | sudden, natural (AMI)                | 6.54 | 0          | x             |             | x          |          |         |
| 332 | Control | m      | 48  | sudden, natural (AMI)                | 6.79 | 0          | x             | x           | x          |          |         |
| 338 | Control | m      | 58  | sudden, natural (pneumonia)          | 6.15 | 0          |               | x           | x          |          |         |
| 342 | Control | m      | 29  | sudden, natural (AMI)                | 6.92 | 0          | x             |             | x          |          | x       |
| 344 | Control | m      | 25  | food asphyxiation                    | 6.76 | 0          | x             | x           |            |          | x       |
| 351 | Control | f      | 19  | sudden, natural (AHF)                | 6.76 | 0          |               | x           |            |          |         |
| 352 | Control | m      | 44  | sudden, natural (AMI)                | 6.87 | 1.19       |               | x           | x          |          |         |
| 365 | Control | m      | 20  | sudden, natural (AHF)                | 6.59 | 2.14       |               | x           |            |          |         |
| 372 | Control | m      | 22  | sudden, natural (AMI)                | 6.79 | 0          | x             |             | x          |          | x       |
| 376 | Control | m      | 30  | sudden, natural (AMI)                | 6.33 | 0          | x             | x           | x          |          |         |

| ID  | Group   | Gender | Age | Cause of death                       | pH   | Blood EtOH | WB, PCR, ChIP | Micro-array | Nanostring | ATAC-seq | RNA-seq |
|-----|---------|--------|-----|--------------------------------------|------|------------|---------------|-------------|------------|----------|---------|
| 387 | Control | f      | 36  | sudden, natural (AMI)                | 6.82 | 0          | x             | x           | x          |          |         |
| 395 | Control | m      | 43  | sudden, natural (pulmonary embolism) | 6.40 | 0          |               | x           |            |          |         |
| 398 | Control | m      | 15  | sudden, natural (undetermined)       | 6.81 | 0          |               | x           | x          |          |         |
| 405 | Control | f      | 31  | sudden, natural (AHF)                | 6.98 | 0          | x             | x           | x          |          | x       |
| 406 | Control | m      | 19  | electric shock                       | 6.82 | 0          | x             | x           |            |          | x       |
| 407 | Control | f      | 27  | sudden, natural (pneumonia)          | 6.75 | 1.26       | x             | x           | x          |          |         |
| 412 | Control | m      | 23  | electric shock                       | 6.76 | 0          | x             | x           | x          |          |         |
| 416 | Control | m      | 37  | sudden, natural (AMI)                | 6.81 | 0          | x             | x           | x          |          |         |
| 427 | Control | m      | 38  | sudden, natural (pneumonia)          | 6.52 | 0          |               | x           |            |          |         |
| 430 | Control | m      | 26  | sudden, natural (pneumonia)          | 6.96 | 0          |               | x           |            | x        | x       |
| 431 | Control | m      | 25  | electric shock                       | 6.79 | 0          |               |             |            | x        | x       |
| 437 | Control | m      | 20  | sudden, natural (undetermined)       | 6.37 | 0          |               | x           |            |          |         |
| 440 | Control | m      | 28  | sudden, natural (AMI)                | 6.70 | 0          |               | x           |            | x        | x       |
| 444 | Control | m      | 24  | sudden, natural (AHF)                | 6.75 | 0          |               |             |            | x        | x       |
| 446 | Control | f      | 22  | sudden, natural (AMI)                |      | 0          |               |             |            | x        | x       |
| 448 | Control | m      | 31  | electric shock                       | 6.98 | 0          |               |             |            | x        | x       |
| 456 | Control | m      | 20  | sudden, natural (hypothermia)        |      | 0          |               |             |            | x        | x       |
| 457 | Control | m      | 27  | electric shock                       |      | 0          |               |             |            | x        |         |
| 499 | Control | f      | 27  | sudden, natural (pulmonary embolism) | 6.08 | 0          |               |             |            | x        | x       |
| 504 | Control | m      | 22  | sudden, natural (pneumonia)          |      | 0          |               |             |            | x        | x       |

| ID  | Group  | Gender | Age | Cause of death  | pH   | Blood EtOH | WB, PCR, ChIP | Micro-array | Nanostring | ATAC-seq | RNA-seq |
|-----|--------|--------|-----|-----------------|------|------------|---------------|-------------|------------|----------|---------|
| 225 | Heroin | m      | 39  | heroin overdose | 6.85 | 2          |               |             | x          |          |         |
| 255 | Heroin | f      | 32  | heroin overdose | 6.48 | 0          |               |             | x          |          |         |
| 256 | Heroin | m      |     | heroin overdose |      |            |               | x           |            |          |         |
| 302 | Heroin | m      | 26  | heroin overdose | 6.48 | 0          | x             | x           | x          |          |         |
| 309 | Heroin | m      | 25  | heroin overdose | 6.74 | 0          | x             |             | x          |          |         |
| 310 | Heroin | m      | 26  | heroin overdose | 6.57 | 0          | x             | x           |            |          |         |
| 312 | Heroin | m      | 21  | heroin overdose | 6.66 | 0          |               | x           |            |          |         |
| 316 | Heroin | m      | 22  | heroin overdose | 6.75 | 0          | x             | x           | x          |          |         |
| 318 | Heroin | m      | 28  | heroin overdose | 6.8  | 0          | x             | x           | x          |          | x       |
| 322 | Heroin | m      | 25  | heroin overdose | 6.13 | 0          | x             |             |            |          |         |
| 325 | Heroin | m      | 22  | heroin overdose | 6.2  | 0          | x             | x           |            |          | x       |
| 328 | Heroin | m      | 23  | heroin overdose | 6.56 | 0          |               | x           |            |          |         |
| 333 | Heroin | m      | 23  | heroin overdose | 6.66 | 0          | x             | x           | x          |          | x       |
| 336 | Heroin | m      | 25  | heroin overdose | 6.64 | 0          | x             |             |            |          |         |
| 339 | Heroin | m      | 27  | heroin overdose | 6.66 | 0          | x             | x           | x          |          |         |
| 340 | Heroin | m      | 46  | heroin overdose | 6.47 | 1.31       | x             |             |            |          |         |
| 341 | Heroin | m      | 23  | heroin overdose | 6.41 | 0          | x             | x           | x          |          | x       |
| 343 | Heroin | f      | 19  | heroin overdose | 6.71 | 0          |               |             |            | x        | x       |
| 345 | Heroin | f      | 29  | heroin overdose | 6.61 | 0          | x             | x           |            |          |         |
| 349 | Heroin | f      | 24  | heroin overdose | 6.36 | 0          | x             |             |            |          |         |
| 354 | Heroin | m      | 24  | heroin overdose | 6.55 | 0          | x             |             |            |          |         |
| 357 | Heroin | m      | 25  | heroin overdose | 6.75 | 0          | x             | x           |            |          | x       |

| ID  | Group  | Gender | Age | Cause of death  | pH   | Blood EtOH | WB, PCR, ChIP | Micro-array | Nanostring | ATAC-seq | RNA-seq |
|-----|--------|--------|-----|-----------------|------|------------|---------------|-------------|------------|----------|---------|
| 361 | Heroin | m      | 23  | heroin overdose | 6.69 | 0          |               | x           |            |          |         |
| 364 | Heroin | m      | 25  | heroin overdose | 6.74 | 0          | x             |             | x          |          |         |
| 366 | Heroin | f      | 26  | heroin overdose | 6.75 | 1.12       | x             | x           |            |          |         |
| 367 | Heroin | m      | 31  | heroin overdose | 6.6  | 0          | x             | x           | x          |          | x       |
| 368 | Heroin | m      | 20  | heroin overdose | 6.52 | 0          | x             |             | x          |          |         |
| 370 | Heroin | m      | 28  | heroin overdose | 6.85 | 1.39       | x             |             | x          |          |         |
| 371 | Heroin | f      | 21  | heroin overdose | 6.76 | 0          |               | x           |            | x        | x       |
| 375 | Heroin | m      | 25  | heroin overdose | 6.56 | 0          | x             |             | x          |          |         |
| 377 | Heroin | m      | 21  | heroin overdose | 6.82 | 0          | x             | x           | x          |          |         |
| 382 | Heroin | m      | 24  | heroin overdose | 6.47 | 0.52       |               |             | x          |          |         |
| 383 | Heroin | m      | 23  | heroin overdose | 6.68 | 0          | x             |             |            |          |         |
| 385 | Heroin | f      | 25  | heroin overdose | 6.42 | 0          | x             |             |            |          |         |
| 388 | Heroin | m      | 29  | heroin overdose | 6.79 | 0          | x             |             | x          |          |         |
| 389 | Heroin | m      | 27  | heroin overdose | 6.47 | 0          | x             |             | x          |          |         |
| 397 | Heroin | m      | 26  | heroin overdose | 6.5  | 0          | x             | x           | x          |          |         |
| 401 | Heroin | m      | 26  | heroin overdose | 6.28 | 0          | x             | x           | x          |          |         |
| 408 | Heroin | m      | 36  | heroin overdose | 6.38 | 0          | x             | x           |            |          |         |
| 429 | Heroin | m      | 30  | heroin overdose | 6.61 | 0.34       |               | x           |            |          |         |
| 439 | Heroin | m      | 27  | heroin overdose |      | 0          |               |             |            | x        | x       |
| 468 | Heroin | f      | 22  | heroin overdose |      | 0          |               |             |            | x        | x       |
| 477 | Heroin | m      | 28  | heroin overdose |      | 2.9        |               |             |            | x        | x       |
| 481 | Heroin | m      | 27  | heroin overdose | 6.22 | 2.54       |               |             |            | x        | x       |



| ID  | Group  | Gender | Age | Cause of death  | pH   | Blood EtOH | WB, PCR, ChIP | Micro-array | Nanostring | ATAC-seq | RNA-seq |
|-----|--------|--------|-----|-----------------|------|------------|---------------|-------------|------------|----------|---------|
| 484 | Heroin | m      | 28  | heroin overdose | 6.14 | 0          |               |             |            | x        | x       |
| 487 | Heroin | m      | 26  | heroin overdose |      | 0          |               |             |            | x        | x       |
| 488 | Heroin | m      | 26  | heroin overdose | 6.52 | 0          |               |             |            | x        | x       |
| 497 | Heroin | m      | 27  | heroin overdose | 7.16 | 0          |               |             |            | x        | x       |

m: male, f: female, AMI: acute myocardial infarct, AHF: acute heart failure.

**Supplemental Table S2.** Summary demographic information for heroin and control groups.

**A. Complete population**

|                    | <b>Control</b> | <b>Heroin</b> |
|--------------------|----------------|---------------|
| Number             | n=37           | n=48          |
| Age                | 31.57 ± 1.86   | 26.19 ± 0.70  |
| Race               | Caucasian      | Caucasian     |
| Gender             | m=30, f=7      | m=40, f=8     |
| PMI                | < 24 hours     | < 24 hours    |
| brain pH           | 6.69 ± 0.04    | 6.58 ± 0.03   |
| Ethanol toxicology | n=3            | n=8           |
| Blood ethanol      | 0.23 ± 0.13    | 0.13 ± 0.10   |

PMI: post-mortem interval, m: male, f: female

**B. Microarray population**

|                    | <b>Control</b> | <b>Heroin</b> |
|--------------------|----------------|---------------|
| Number             | n=26           | n=22          |
| Age                | 33.42 ± 2.36   | 25.49 ± 0.84  |
| Race               | Caucasian      | Caucasian     |
| Gender             | m=21, f=5      | m=19, f=3     |
| PMI                | < 24 hours     | < 24 hours    |
| brain pH           | 6.69 ± 0.05    | 6.60 ± 0.04   |
| Ethanol toxicology | n=4            | n=2           |
| Blood ethanol      | 0.33 ± 0.18    | 0.07 ± 0.05   |

PMI: post-mortem interval, m: male, f: female

**C. Nanostring population**

|                    | <b>Control</b> | <b>Heroin</b> |
|--------------------|----------------|---------------|
| Number             | n=16           | n=20          |
| Age                | 36.63 ± 3      | 26.35 ± 0.96  |
| Race               | Caucasian      | Caucasian     |
| Gender             | m=13, f=3      | m=19, f=1     |
| PMI                | < 24 hours     | < 24 hours    |
| brain pH           | 6.74 ± 0.05    | 6.59 ± 0.04   |
| Ethanol toxicology | n=2            | n=2           |
| Blood ethanol      | 0.15 ± 0.1     | 0.20 ± 0.04   |

PMI: post-mortem interval, m: male, f: female

## D. ATAC-seq population

|                    | <b>Control</b> | <b>Heroin</b> |
|--------------------|----------------|---------------|
| Number             | n=10           | n=10          |
| Age                | 25.2 ± 1.04    | 25.1 ± 0.12   |
| Race               | Caucasian      | Caucasian     |
| Gender             | m=8, f=2       | m=7, f=3      |
| PMI                | < 24 hours     | < 24 hours    |
| brain pH           | 6.71 ± 0.1     | 6.59 ± 0.36   |
| Ethanol toxicology | n=0            | n=2           |
| Blood ethanol      | 0 ± 0          | 0.54 ± 0.36   |

PMI: post-mortem interval, m: male, f: female, ATAC: assay for transposase accessible chromatin

## E. RNA-seq population

|                    | <b>Control</b> | <b>Heroin</b> |
|--------------------|----------------|---------------|
| Number             | n=14           | n=16          |
| Age                | 25.07 ± 1.02   | 25.19 ± 0.07  |
| Race               | Caucasian      | Caucasian     |
| Gender             | m=11, f=3      | m=13, f=3     |
| PMI                | < 24 hours     | < 24 hours    |
| brain pH           | 6.78 ± 0.07    | 6.58 ± 0.26   |
| Ethanol toxicology | n=0            | n=2           |
| Blood ethanol      | 0 ± 0          | 2 ± 0.23      |

PMI: post-mortem interval, m: male, f: female

## F. Western blot/PCR/ChIP population

|                    | <b>Control</b> | <b>Heroin</b> |
|--------------------|----------------|---------------|
| Number             | n=13           | n=30          |
| Age                | 32.3 ± 2.75    | 26.3 ± 0.89   |
| Race               | Caucasian      | Caucasian     |
| Gender             | m=10, f=3      | m=26, f=4     |
| PMI                | < 24 hours     | < 24 hours    |
| brain pH           | 6.75 ± 0.05    | 6.57 ± 0.03   |
| Ethanol toxicology | n=1            | n=3           |
| Blood ethanol      | 0.097 ± 0.09   | 0.13 ± 0.07   |

PMI: post-mortem interval, m: male, f: female, ChIP: chromatin immunoprecipitation

**Supplemental Table S3.** Differentially expressed genes in the ventral striatum of post-mortem human heroin users vs matched controls. Gene symbol, Affymetrix HG-U133A Probeset ID, corrected p value, mean and standard deviations are shown.

| Gene symbol | Probeset    | P value     | Mean Control | STDEV Control | Mean Heroin | STDEV Heroin |
|-------------|-------------|-------------|--------------|---------------|-------------|--------------|
| 39699       | 208657_s_at | 0.0098204   | 76.97037037  | 40.5900406    | 47.60909091 | 37.27964987  |
| 39699       | 41220_at    | 0.00625494  | 1277.774074  | 536.9535258   | 812.8090909 | 565.548616   |
| 39701       | 214293_at   | 0.0128889   | 767.4814815  | 227.9126453   | 877.1681818 | 227.3715428  |
| A2bp1       | 221217_s_at | 0.00827879  | 2176.681481  | 841.7187919   | 2565.222727 | 607.8510696  |
| AAGAB       | 202852_s_at | 0.0133912   | 183.6592593  | 48.4191178    | 124.3681818 | 71.23290696  |
| aak1        | 214956_at   | 0.00537049  | 229.8222222  | 60.05757067   | 311.4318182 | 98.70200648  |
| AASDHPPT    | 202169_s_at | 0.000718164 | 973.6296296  | 265.6558036   | 1409.595455 | 503.0061596  |
| AATF        | 209165_at   | 0.00612689  | 300.9962963  | 84.51665508   | 236.2272727 | 70.71805981  |
| Abcb9       | 214209_s_at | 0.0196707   | 243.1481481  | 73.94385277   | 185.05      | 69.90739282  |
| ABCF1       | 200045_at   | 0.0083311   | 592.0481481  | 98.97782724   | 487.0454545 | 101.0169421  |
| Abi1        | 209028_s_at | 0.0222653   | 321.0814815  | 70.84770251   | 413.0818182 | 142.4906835  |
| ABI2        | 216113_at   | 0.00839789  | 22.22592593  | 20.76514448   | 50.09545455 | 30.72522583  |
| Acaa1       | 214274_s_at | 0.00765388  | 480.4666667  | 158.7324067   | 390.4545455 | 104.4826152  |
| ACACA       | 214358_at   | 0.0105959   | 22.31851852  | 13.3348888    | 17.10454545 | 8.072261574  |
| ACAN        | 205679_x_at | 0.0100878   | 199.937037   | 53.67270577   | 177.9136364 | 36.37706362  |
| ACAP1       | 205213_at   | 0.000410074 | 10.48518519  | 2.860702402   | 15.9        | 6.537875001  |
| ACAP2       | 212476_at   | 0.0121774   | 176.3148148  | 56.85723487   | 239.6045455 | 67.59411412  |
| ACBD3       | 202324_s_at | 0.00524004  | 330.2592593  | 103.8120612   | 381.7136364 | 90.48643832  |
| ACE2        | 219962_at   | 0.00588039  | 18.86666667  | 11.34894099   | 11.63181818 | 13.42536286  |
| ACOT8       | 204212_at   | 0.000538501 | 303.5703704  | 56.6771207    | 245.8681818 | 40.88689843  |
| ACSL3       | 201661_s_at | 0.0254128   | 421.5518519  | 193.5693681   | 479.9363636 | 149.6552659  |
| Acsl4       | 202422_s_at | 0.00700271  | 67.67777778  | 22.45861721   | 99.64545455 | 39.59804862  |
| ACSS3       | 219616_at   | 0.0197582   | 103.0888889  | 39.43121892   | 92.51363636 | 39.2985556   |
| Actc1       | 205132_at   | 0.0208932   | 106.7037037  | 31.65142458   | 143.0272727 | 53.7617423   |
| ACTL8       | 214957_at   | 0.026493    | 18.46666667  | 8.108210464   | 15.83636364 | 5.901617652  |
| ACTN2       | 203863_at   | 0.00163974  | 311.5185185  | 110.9611714   | 434.4454545 | 168.0426724  |
| ACTR1A      | 200721_s_at | 0.0158801   | 896.6259259  | 192.8927294   | 762.8136364 | 178.2622554  |
| ACTR1A      | 200720_s_at | 0.0239931   | 498.1444444  | 211.456099    | 369.2772727 | 105.520158   |
| Actr2       | 200728_at   | 0.00681404  | 833.6555556  | 374.0571535   | 1277.345455 | 624.1760853  |
| ACTR3B      | 218868_at   | 0.00545367  | 744.462963   | 215.6732485   | 864.6       | 195.9800087  |
| ACY1        | 202740_at   | 0.0185989   | 143.5518519  | 40.18635791   | 120.7       | 46.70350247  |
| ADAM10      | 202603_at   | 0.00320339  | 678.4037037  | 151.8828255   | 830.8454545 | 158.6053525  |
| Adam21      | 207665_at   | 0.0171353   | 94.51111111  | 32.90782387   | 110.7909091 | 51.6354521   |
| ADAM23      | 206046_at   | 0.00855038  | 386.9592593  | 80.03395077   | 455.5090909 | 97.89022963  |
| ADAM23      | 213808_at   | 0.00936896  | 237.3222222  | 57.87511976   | 295.4954545 | 83.93784252  |
| Adams3      | 214913_at   | 0.000987591 | 154.2481481  | 54.71904021   | 230.4136364 | 95.4427093   |

| Gene symbol | Probeset    | P value     | Mean Control | STDEV Control | Mean Heroin | STDEV Heroin |
|-------------|-------------|-------------|--------------|---------------|-------------|--------------|
| ADAP1       | 90265_at    | 0.0265107   | 2037.403704  | 779.0969247   | 1477.477273 | 470.830569   |
| ADCK2       | 221894_at   | 0.0193359   | 72.8         | 41.19792751   | 46.45454545 | 28.7802632   |
| ADCY1       | 213245_at   | 0.00647316  | 342.5555556  | 164.6505725   | 431.4181818 | 202.4880164  |
| Add1        | 208030_s_at | 0.0119818   | 646.5444444  | 136.3450384   | 554.6727273 | 76.83158565  |
| Add1        | 214736_s_at | 0.00660595  | 1136.2       | 351.1515123   | 943.9681818 | 230.1652582  |
| adh7        | 210505_at   | 0.00230021  | 94.84444444  | 27.0696869    | 73.29545455 | 30.35435918  |
| Adm2        | 220538_at   | 0.0225742   | 111.5444444  | 50.67496221   | 146.5090909 | 49.97715582  |
| ADRB2       | 206170_at   | 0.032755    | 115.2740741  | 35.04223378   | 95.08181818 | 37.69628801  |
| Adrb3       | 217303_s_at | 0.0092999   | 8.425925926  | 3.877210793   | 6.709090909 | 2.000216439  |
| Adrm1       | 201281_at   | 0.0143724   | 558.2962963  | 168.0627595   | 432.4909091 | 136.7030285  |
| AFTPH       | 217939_s_at | 0.0226363   | 586.2925926  | 88.94354703   | 666.0409091 | 119.7455821  |
| AGFG1       | 218091_at   | 0.0294635   | 319.462963   | 58.46384911   | 370.7045455 | 91.91578691  |
| AGFG2       | 222362_at   | 0.0208884   | 167.1925926  | 52.04733737   | 127.5045455 | 49.62113103  |
| AGGF1       | 218534_s_at | 0.00362017  | 246.1962963  | 71.53226535   | 306.2818182 | 73.16418351  |
| agl         | 203566_s_at | 0.0232807   | 292.8666667  | 63.17982882   | 377.9454545 | 117.3932655  |
| Agtr1       | 208016_s_at | 0.0288473   | 43.81481481  | 19.81277179   | 34.78181818 | 28.93828633  |
| agxt        | 206957_at   | 0.0283739   | 23.38148148  | 17.81693311   | 16.57272727 | 25.74015173  |
| Ahi1        | 221569_at   | 0.00942664  | 584.9        | 264.6521287   | 630.8272727 | 204.8276841  |
| Aif1        | 209901_x_at | 0.0294497   | 81.65185185  | 95.99057394   | 31.54545455 | 12.44445668  |
| AIFM1       | 216758_at   | 0.00100645  | 6.325925926  | 5.06599467    | 14.10454545 | 10.01895714  |
| ALG1        | 216179_x_at | 0.0282664   | 18.7037037   | 15.56903933   | 32.84545455 | 26.46927648  |
| Aim1l       | 220289_s_at | 0.02178     | 7.277777778  | 4.187557883   | 5.427272727 | 2.284144483  |
| aip         | 201782_s_at | 0.0179095   | 1143.340741  | 332.1915681   | 1013.286364 | 324.3592795  |
| AJAP1       | 215790_at   | 0.0258743   | 13.86666667  | 13.84135387   | 8.109090909 | 4.108053541  |
| Ak2         | 212174_at   | 0.00334254  | 183.3555556  | 43.13427455   | 147.7318182 | 35.9476125   |
| Ak2         | 205996_s_at | 0.0206205   | 68.48148148  | 27.81008446   | 51.41818182 | 21.91072006  |
| AKAP11      | 203156_at   | 0.00802416  | 1784.325926  | 963.579209    | 2603.290909 | 1025.678004  |
| AKAP5       | 207800_at   | 0.00834291  | 71.33703704  | 33.64175688   | 108.3045455 | 36.06439317  |
| AKAP6       | 205359_at   | 0.030036    | 223.2592593  | 52.67517485   | 271.4590909 | 68.04787292  |
| AKAP7       | 205771_s_at | 0.0116225   | 193.6333333  | 55.17256843   | 242.4454545 | 46.28622882  |
| Akap9       | 210962_s_at | 0.00119377  | 269.7666667  | 98.92497546   | 364.8318182 | 101.4909632  |
| AKR1A1      | 201900_s_at | 0.0194148   | 598.7888889  | 182.6639545   | 462.9318182 | 106.2885309  |
| alb         | 214837_at   | 0.00925396  | 19.68888889  | 10.96586779   | 33.16363636 | 15.60203117  |
| ALDH1L1     | 205208_at   | 0.000438783 | 504.8        | 123.203562    | 363.2136364 | 161.389034   |
| ALDH5A1     | 203608_at   | 0.0236067   | 698.9185185  | 194.116238    | 885.0954545 | 290.6107878  |
| ALDOA       | 214687_x_at | 0.0308059   | 8182.7       | 2548.366237   | 6642.095455 | 2301.879684  |
| ALG13       | 205583_s_at | 0.0096368   | 287.5037037  | 152.0832982   | 332.5818182 | 120.1728978  |
| ALOX5AP     | 204174_at   | 0.00181516  | 161.2296296  | 95.47325366   | 109.8409091 | 34.8525692   |
| Amh         | 206516_at   | 0.0301558   | 10.75555556  | 6.109534373   | 20.5        | 19.35402013  |
| AMIGO2      | 222108_at   | 0.0191198   | 205.137037   | 54.36026651   | 262.8727273 | 80.34227483  |

| Gene symbol | Probeset    | P value     | Mean Control | STDEV Control | Mean Heroin | STDEV Heroin |
|-------------|-------------|-------------|--------------|---------------|-------------|--------------|
| ANGEL2      | 217630_at   | 0.0037796   | 36.68518519  | 26.33908625   | 49.33636364 | 24.91730218  |
| ANK3        | 206385_s_at | 0.00844574  | 1257.337037  | 481.7824319   | 1512.431818 | 420.6970728  |
| ANKRD10     | 218093_s_at | 0.0115983   | 189.5111111  | 66.91465479   | 256.7363636 | 55.7515624   |
| ANKRD26     | 205706_s_at | 0.0122539   | 20.91111111  | 13.83105017   | 35.13181818 | 20.79451362  |
| ANKRD28     | 213035_at   | 0.0149073   | 524.362963   | 151.3778338   | 614.7363636 | 156.7045736  |
| Ano3        | 215241_at   | 0.0101579   | 4011.174074  | 1303.537752   | 5168.627273 | 1570.26974   |
| ANP32A      | 201038_s_at | 0.00568007  | 382.4777778  | 81.02069694   | 461.3545455 | 117.8044131  |
| ANP32E      | 221505_at   | 0.00416273  | 685.7259259  | 171.0308915   | 931.8136364 | 236.3921929  |
| ANXA1       | 201012_at   | 0.00625609  | 73.2         | 20.34421105   | 98.05454545 | 34.77530223  |
| ANXA2       | 210427_x_at | 0.00557745  | 384.5407407  | 91.82146665   | 325.8090909 | 82.6545704   |
| ANXA9       | 211712_s_at | 0.0013566   | 48.65555556  | 17.5445002    | 36.06363636 | 17.7431555   |
| Aoah        | 205639_at   | 0.0309401   | 179.9666667  | 64.41060591   | 141.3727273 | 61.84853374  |
| AP1AR       | 219023_at   | 0.0100726   | 141.8925926  | 48.62836246   | 208.9090909 | 91.54548653  |
| AP1B1       | 205423_at   | 0.0181803   | 295.4777778  | 64.16953707   | 229.7590909 | 68.21797458  |
| AP3M2       | 203410_at   | 0.0329233   | 892.237037   | 134.02282     | 940.5181818 | 189.741914   |
| ap3s1       | 202442_at   | 2.40375E-05 | 1358.692593  | 212.255827    | 1813.590909 | 315.1389488  |
| ap3s2       | 202399_s_at | 0.00915175  | 888.9777778  | 132.6809398   | 780.9272727 | 144.4804656  |
| APBA2       | 209870_s_at | 0.0138837   | 413.6851852  | 106.8192424   | 347.0409091 | 91.28240147  |
| APC         | 203525_s_at | 0.0151348   | 345.5777778  | 114.3215786   | 492.0954545 | 166.0987987  |
| APC         | 203527_s_at | 0.00115616  | 76.28518519  | 57.38371321   | 146.7181818 | 68.08134236  |
| APIP        | 218698_at   | 0.0113254   | 121.3148148  | 46.75797508   | 163.5090909 | 50.50107881  |
| APOBEC3B    | 206632_s_at | 0.00299078  | 30.87037037  | 16.0162133    | 21.8        | 11.38825627  |
| Apol2       | 221653_x_at | 0.00761506  | 91.6962963   | 66.54060924   | 56.20909091 | 32.75398789  |
| Aprt        | 203219_s_at | 0.0158415   | 140.8        | 37.60098198   | 103.75      | 51.61076623  |
| Aprt        | 213892_s_at | 0.0129539   | 278.0555556  | 77.1929866    | 211.0363636 | 59.56778888  |
| aqp1        | 209047_at   | 0.00288949  | 618.2444444  | 316.1591704   | 441.4681818 | 318.1595128  |
| AQP3        | 39249_at    | 0.0225456   | 43.97407407  | 31.23977485   | 31.52272727 | 17.95647998  |
| ARFGAP2     | 211975_at   | 0.00410958  | 1028.074074  | 230.9647635   | 776.7272727 | 250.0656622  |
| arglu1      | 218067_s_at | 0.0226956   | 538.9444444  | 197.0533242   | 637.5363636 | 144.6950506  |
| ARHGAP15    | 218870_at   | 0.0159411   | 35.64444444  | 22.33350938   | 19.48636364 | 18.1471576   |
| arhgap26    | 215955_x_at | 0.0165522   | 10.25925926  | 7.59191165    | 20.25454545 | 22.66534437  |
| ARHGAP29    | 203910_at   | 0.0136757   | 164.8        | 39.58028841   | 224.7227273 | 87.17425861  |
| ARHGEF12    | 201335_s_at | 0.000949912 | 79.52592593  | 25.76611658   | 110.8272727 | 34.84560752  |
| ARHGEF15    | 205507_at   | 0.0112811   | 137.5592593  | 47.27281915   | 116.4       | 46.73224644  |
| ARHGEF9     | 203264_s_at | 0.00835846  | 971.6185185  | 354.3302187   | 1193.381818 | 404.4248375  |
| ARID4A      | 205062_x_at | 0.00226732  | 166.8111111  | 59.13183662   | 263.9590909 | 97.5561165   |
| arl5a       | 218150_at   | 0.00761818  | 572.0888889  | 143.2742591   | 683.6227273 | 133.128459   |
| ARL6IP4     | 218216_x_at | 0.00451299  | 1092.933333  | 236.0070664   | 851.9318182 | 241.9821646  |
| armc8       | 203487_s_at | 0.00220405  | 151.637037   | 42.93192418   | 179.5181818 | 24.20691826  |
| armc8       | 203486_s_at | 0.0198533   | 190.6592593  | 37.08254057   | 224.8954545 | 45.51160477  |

| Gene symbol | Probeset    | P value     | Mean Control | STDEV Control | Mean Heroin | STDEV Heroin |
|-------------|-------------|-------------|--------------|---------------|-------------|--------------|
| ARPC1B      | 201954_at   | 0.0045194   | 230.5259259  | 83.35223034   | 167.15      | 55.70409705  |
| ARPP19      | 221483_s_at | 0.0334285   | 2182.218519  | 644.2223398   | 2696.327273 | 714.3672426  |
| ARRB1       | 218832_x_at | 0.0191867   | 29.3962963   | 18.28270476   | 21.62272727 | 15.3990393   |
| Arvcf       | 217516_x_at | 0.0306106   | 266.2444444  | 83.38694942   | 217.9454545 | 74.32303833  |
| asap1       | 215435_at   | 0.0101077   | 64.77777778  | 16.85588994   | 85.72727273 | 22.82352967  |
| Asap2       | 206414_s_at | 0.000294277 | 449.3851852  | 88.85017079   | 576         | 144.6894968  |
| ASB13       | 218862_at   | 0.0220581   | 334.8814815  | 76.057883     | 268.3818182 | 82.99643501  |
| Asip        | 214498_at   | 0.0315331   | 43.52222222  | 34.26497801   | 27.44090909 | 22.59358651  |
| asl         | 204608_at   | 0.0095052   | 163          | 35.87120122   | 126.3318182 | 41.68657871  |
| ASMTL       | 209394_at   | 0.0193937   | 486.4185185  | 162.4417482   | 355.5363636 | 146.2834286  |
| ASMTL       | 36553_at    | 0.0259557   | 904.1925926  | 325.9177066   | 678.9954545 | 216.1932149  |
| ASPHD1      | 214993_at   | 0.0238751   | 237.937037   | 85.10101757   | 172.5909091 | 68.63673117  |
| aspscr1     | 218908_at   | 0.00612327  | 179.0296296  | 68.33789812   | 119.4727273 | 55.31602869  |
| Astn1       | 213197_at   | 0.000589914 | 588.7        | 229.3332241   | 820.0545455 | 251.4969217  |
| ATAD2       | 218782_s_at | 0.0279012   | 26.9037037   | 16.16543039   | 36.33636364 | 21.03209668  |
| Atf2        | 212984_at   | 0.0240962   | 202.8407407  | 65.31350584   | 275.1772727 | 82.13026779  |
| Atg12       | 213026_at   | 0.00570835  | 306.4444444  | 83.82656699   | 381.5045455 | 89.12584723  |
| ATG4B       | 204903_x_at | 0.00250364  | 354.4259259  | 62.06556454   | 278.9090909 | 73.28371422  |
| ATM         | 212672_at   | 0.0119408   | 77.82962963  | 28.277428     | 121.6       | 54.9203059   |
| ATMIN       | 201855_s_at | 0.0284297   | 275.5518519  | 78.6596924    | 343.0454545 | 95.81364714  |
| ATP10D      | 213238_at   | 0.0193044   | 90.01851852  | 25.20576914   | 118.1090909 | 38.80301791  |
| ATP13A1     | 218052_s_at | 0.0291956   | 301.6111111  | 52.21676958   | 261.2       | 49.05715811  |
| ATP13A3     | 212297_at   | 0.016875    | 148.3074074  | 58.24140033   | 185.9772727 | 58.72058073  |
| ATP2B1      | 209281_s_at | 0.00412123  | 1873.833333  | 716.4445311   | 2934.122727 | 1554.842791  |
| ATP2B1      | 212930_at   | 0.00377209  | 891.9111111  | 358.6014987   | 1305.095455 | 499.26094    |
| Atp2b3      | 215911_x_at | 0.0131194   | 21.88518519  | 12.25280827   | 34.25909091 | 16.26988627  |
| ATP2C2      | 214798_at   | 0.0132659   | 84.92592593  | 36.66489195   | 100.1863636 | 33.00592004  |
| Atp5d       | 213041_s_at | 0.0120456   | 1512.866667  | 456.9721781   | 1069.786364 | 376.6600682  |
| atp5i       | 208745_at   | 0.0287218   | 737.6814815  | 274.1351773   | 801.15      | 229.411522   |
| ATP5SL      | 218038_at   | 0.0209351   | 100.2740741  | 68.69182905   | 66.45       | 32.21696906  |
| ATP6AP2     | 201443_s_at | 0.0162499   | 1895.3       | 454.5000135   | 2128.990909 | 651.1351604  |
| ATP6V0E1    | 200096_s_at | 0.00469009  | 474.0555556  | 188.4604413   | 393.7590909 | 101.5515288  |
| ATP6V0E1    | 201172_x_at | 0.0297406   | 985.8518519  | 336.0799428   | 889.7545455 | 259.2810347  |
| ATP6V0E1    | 214150_x_at | 0.0327756   | 1285.325926  | 345.6512244   | 1112.340909 | 365.5441158  |
| ATP6V1C1    | 202873_at   | 0.0131093   | 84.05185185  | 35.03035355   | 114.6136364 | 31.5785083   |
| ATP9A       | 216129_at   | 0.0033092   | 100.3740741  | 56.66140046   | 152.1818182 | 65.16740082  |
| ATR         | 209903_s_at | 0.0228993   | 312.2777778  | 89.71300537   | 354.0636364 | 88.59125263  |
| ATRNL1      | 213744_at   | 0.000929803 | 237.8814815  | 66.91143421   | 309.4454545 | 78.74617286  |
| Atrx        | 208860_s_at | 0.000611538 | 129.7037037  | 62.18999723   | 206.7636364 | 72.86992681  |
| Atrx        | 208861_s_at | 0.000108576 | 851.5740741  | 182.8958733   | 1147.727273 | 243.9179354  |

| Gene symbol | Probeset    | P value     | Mean Control | STDEV Control | Mean Heroin | STDEV Heroin |
|-------------|-------------|-------------|--------------|---------------|-------------|--------------|
| ATXN1       | 203231_s_at | 0.0058867   | 375.6518519  | 148.3508533   | 511.8363636 | 167.2630393  |
| ATXN1       | 203232_s_at | 0.00275788  | 778.137037   | 249.0361684   | 1080.986364 | 365.8092533  |
| ATXN7       | 204516_at   | 0.0044524   | 106.337037   | 38.59443113   | 153.7045455 | 47.21331004  |
| AURKB       | 209464_at   | 0.0135334   | 39.52592593  | 18.44829766   | 24.84545455 | 17.41618643  |
| AVL9        | 212474_at   | 0.0113665   | 323.1481481  | 73.41961261   | 416.5       | 115.9581164  |
| AZGP1       | 217014_s_at | 0.00700729  | 102.1333333  | 38.58280805   | 146.7227273 | 62.23581064  |
| Azi1        | 214742_at   | 0.00673079  | 76.84814815  | 37.78638715   | 43.31363636 | 21.78237154  |
| AZIN1       | 212461_at   | 0.0304909   | 497.3111111  | 156.6378561   | 606.65      | 143.5014775  |
| B3galt2     | 210121_at   | 0.0240599   | 37.98888889  | 17.85786475   | 47.05454545 | 14.75997572  |
| B4galt5     | 221484_at   | 0.0245141   | 387.7814815  | 82.72352952   | 428.4409091 | 91.98145599  |
| B4GALT6     | 206233_at   | 0.0217535   | 80.23333333  | 35.44710035   | 115.2409091 | 53.16152081  |
| Bach2       | 221234_s_at | 0.01295     | 106.7925926  | 31.82802256   | 136.5545455 | 33.18062727  |
| Bad         | 1861_at     | 0.00533561  | 208.2518519  | 55.36136789   | 183.7590909 | 53.76105564  |
| bag1        | 202387_at   | 0.0173618   | 1004.033333  | 297.7551614   | 726.3636364 | 281.2695615  |
| BAMBI       | 203304_at   | 0.0250112   | 195.5592593  | 48.53414547   | 167.0318182 | 39.59798439  |
| Basp1       | 202391_at   | 0.000221077 | 3192.311111  | 732.5212627   | 4016.431818 | 857.0831817  |
| Bat2l2      | 211946_s_at | 0.0114734   | 614.9740741  | 220.4530991   | 775         | 239.4706742  |
| BAZ1A       | 217986_s_at | 0.00503112  | 38.40740741  | 20.86881969   | 60.68181818 | 22.08329764  |
| Bbs1        | 218471_s_at | 0.00677573  | 446.4814815  | 86.13769405   | 571.2272727 | 170.9387615  |
| BCAP31      | 200837_at   | 0.000388379 | 1447.025926  | 439.7327848   | 952.2545455 | 312.0836926  |
| BCAT1       | 214390_s_at | 0.0204726   | 20.02222222  | 11.27322674   | 15.73181818 | 7.205314597  |
| BCL11A      | 219497_s_at | 0.00527691  | 158.4925926  | 58.5683291    | 251.6772727 | 106.5867674  |
| BCL11B      | 219528_s_at | 0.000584346 | 567.0185185  | 173.9695907   | 827.2727273 | 230.8168851  |
| BCL2        | 207004_at   | 0.0184761   | 84.47407407  | 39.56214773   | 61.82727273 | 24.74495007  |
| BCL2L13     | 217955_at   | 0.00020339  | 212.4444444  | 60.53181194   | 172.1636364 | 44.08422183  |
| Bcl2l2      | 209311_at   | 0.00329226  | 682.9185185  | 185.5338411   | 770.75      | 147.400164   |
| Bcl7c       | 219072_at   | 0.0243902   | 270.2444444  | 89.9288622    | 206.6636364 | 102.8049774  |
| BCLAF1      | 201084_s_at | 0.00731043  | 951.0185185  | 358.0234673   | 1217.604545 | 299.5221186  |
| BECN1       | 208946_s_at | 0.0267819   | 443.6592593  | 146.2201482   | 498.4181818 | 148.7075386  |
| BEST1       | 207671_s_at | 0.00118619  | 98.84074074  | 48.51951439   | 65.51363636 | 29.89668393  |
| BEX4        | 215440_s_at | 0.0171207   | 834.2888889  | 356.0711471   | 1129.581818 | 442.7883958  |
| BGLAP       | 206956_at   | 0.00880026  | 171.0555556  | 44.13831698   | 133.3590909 | 39.0549876   |
| BGLAP       | 202337_at   | 0.02758     | 231.0296296  | 52.20550969   | 197.0954545 | 33.80837424  |
| bin1        | 210202_s_at | 0.0276929   | 648.4814815  | 257.9645131   | 463.9636364 | 193.1039507  |
| BIRC5       | 202095_s_at | 0.00618169  | 17.82962963  | 13.72490198   | 11.52272727 | 7.293240956  |
| bloc1s1     | 202592_at   | 0.0330582   | 789.4814815  | 163.6114958   | 703.0772727 | 227.2270816  |
| Bnc1        | 206581_at   | 0.00284651  | 43.01851852  | 26.42369329   | 57.04090909 | 25.63885925  |
| BPTF        | 209271_at   | 0.00155921  | 201.6740741  | 77.22565632   | 297.2409091 | 90.43529473  |
| BRF2        | 218955_at   | 0.00619441  | 449.937037   | 88.5458384    | 374.6409091 | 63.59073502  |
| BRS3        | 207369_at   | 0.00785558  | 97.19259259  | 28.59421574   | 140.2318182 | 57.92058098  |



| Gene symbol | Probeset    | P value     | Mean Control | STDEV Control | Mean Heroin | STDEV Heroin |
|-------------|-------------|-------------|--------------|---------------|-------------|--------------|
| bsg         | 208677_s_at | 0.0331665   | 484.4037037  | 367.9778656   | 367.9909091 | 218.339541   |
| BSPRY       | 218792_s_at | 0.0177795   | 501.4740741  | 216.5777505   | 359.8409091 | 68.13443056  |
| Btaf1       | 209430_at   | 0.00551146  | 159.5888889  | 49.3782834    | 214.0363636 | 74.43838964  |
| C10orf26    | 202808_at   | 0.00813047  | 845.0333333  | 286.0008593   | 689.3272727 | 198.9040093  |
| C11orf24    | 218299_at   | 0.0241979   | 133.0962963  | 42.96037961   | 99.54545455 | 58.74409172  |
| c11orf48    | 221637_s_at | 0.00661766  | 320.9148148  | 75.77563391   | 243.3727273 | 71.14917382  |
| c11orf51    | 204218_at   | 0.0130199   | 665.0259259  | 152.7002131   | 533.9681818 | 129.3298639  |
| C11orf67    | 221599_at   | 0.000525529 | 202.7962963  | 78.51363665   | 148.5409091 | 54.25240534  |
| c12orf11    | 221652_s_at | 0.00955319  | 96.63703704  | 26.22233558   | 124.5545455 | 28.60277588  |
| C12orf44    | 218214_at   | 0.00342569  | 413.2962963  | 92.11040817   | 302.7818182 | 73.70681713  |
| c12orf51    | 211034_s_at | 0.0143115   | 734.2222222  | 159.3186196   | 865.6727273 | 164.6803952  |
| C14orf101   | 219757_s_at | 0.0194429   | 230.5703704  | 61.16546169   | 289.2227273 | 76.99617141  |
| C14orf139   | 219563_at   | 0.00500022  | 186.9555556  | 82.85234472   | 135.1545455 | 41.25663845  |
| c14orf147   | 213508_at   | 0.000912207 | 342.8407407  | 86.18555233   | 413.6227273 | 74.072043    |
| C14orf169   | 219526_at   | 0.02542     | 343.4925926  | 66.84530319   | 301.3909091 | 54.11894228  |
| C14orf79    | 213512_at   | 0.0185621   | 123.6555556  | 26.10723939   | 93.05909091 | 35.80824139  |
| c15orf29    | 218791_s_at | 0.0281078   | 240.5444444  | 71.1994454    | 286.4772727 | 52.79585059  |
| C16orf72    | 217682_at   | 0.0198536   | 70.80740741  | 31.82112175   | 57.05454545 | 23.37894305  |
| C17orf101   | 53071_s_at  | 0.00140108  | 180.3407407  | 58.69780666   | 122.0227273 | 42.70479991  |
| C17orf62    | 218130_at   | 0.00926469  | 212.9851852  | 79.58323028   | 154.7772727 | 35.31937188  |
| C17orf90    | 221797_at   | 0.00187369  | 85.86296296  | 36.34621077   | 42.08636364 | 37.11733385  |
| C19orf24    | 221587_s_at | 0.00257555  | 231.4296296  | 72.92771877   | 168.1727273 | 52.05907982  |
| C19orf36    | 214296_x_at | 0.00220411  | 59.93333333  | 35.0122506    | 39.94545455 | 17.49363768  |
| C19orf42    | 221988_at   | 0.0291746   | 274.6925926  | 56.92125415   | 300.0818182 | 74.55984261  |
| C19orf60    | 51200_at    | 0.0331344   | 1254.707407  | 559.5680738   | 937.6954545 | 353.0816316  |
| C19orf73    | 220151_at   | 0.0087221   | 46.45185185  | 28.49816958   | 35.57727273 | 23.22024839  |
| C1orf103    | 220235_s_at | 0.0281337   | 101.5407407  | 37.87775133   | 138.5772727 | 58.72832473  |
| C1orf123    | 203197_s_at | 0.0209398   | 333.9333333  | 72.74004293   | 282.8454545 | 80.40689219  |
| c1orf144    | 212003_at   | 0.0114146   | 27.21111111  | 25.51300322   | 13.71818182 | 3.361354087  |
| C1orf21     | 221272_s_at | 0.000177305 | 170.9888889  | 50.25561073   | 228.4136364 | 38.99464304  |
| C1orf63     | 209007_s_at | 0.0150186   | 735.7148148  | 289.3989457   | 889.4772727 | 307.0847889  |
| C1qa        | 218232_at   | 0.00751993  | 183.9333333  | 112.6269267   | 123.2545455 | 64.9461002   |
| C1QB        | 202953_at   | 0.0118693   | 264.062963   | 174.0394499   | 158.2727273 | 76.87668036  |
| C1r         | 212067_s_at | 0.0066273   | 158.1444444  | 68.36432005   | 104.8136364 | 44.19607067  |
| C20orf117   | 207711_at   | 0.00158624  | 120.9222222  | 53.04209746   | 80.93181818 | 29.647844    |
| c20orf43    | 217737_x_at | 0.0175586   | 551.7888889  | 136.1627853   | 465.6954545 | 130.8911634  |
| C22orf9     | 217118_s_at | 0.0213785   | 1504.703704  | 752.6185373   | 989.2454545 | 428.5919357  |
| C2orf24     | 200070_at   | 0.00290731  | 407.7259259  | 99.93300676   | 305.4909091 | 82.61166128  |
| C3          | 217767_at   | 0.0134353   | 586.0740741  | 397.4010855   | 303.7045455 | 191.166797   |
| C3orf63     | 209285_s_at | 0.0136555   | 242.962963   | 119.8963243   | 305.0954545 | 95.28044559  |

| Gene symbol | Probeset    | P value     | Mean Control | STDEV Control | Mean Heroin | STDEV Heroin |
|-------------|-------------|-------------|--------------|---------------|-------------|--------------|
| c4orf23     | 220891_at   | 0.000469084 | 22.82962963  | 15.07235918   | 40.92272727 | 19.39636519  |
| C4orf6      | 207241_at   | 0.0281776   | 33.99259259  | 23.04193378   | 24.70909091 | 16.13148088  |
| c5orf42     | 219381_at   | 0.0276866   | 74.73333333  | 35.53310482   | 97.07272727 | 44.50301415  |
| C6orf120    | 221786_at   | 0.0145427   | 254.7259259  | 75.55524007   | 295.9090909 | 53.28969264  |
| C6orf120    | 221787_at   | 0.018916    | 111.0185185  | 36.53525207   | 147.0318182 | 40.59078463  |
| C6orf162    | 213312_at   | 0.00649727  | 149.8185185  | 80.55444903   | 255.2772727 | 118.7519862  |
| C6orf208    | 220904_at   | 0.0200321   | 68.77037037  | 49.45286656   | 81.49090909 | 25.18385554  |
| c6orf211    | 218195_at   | 0.00789992  | 106.0296296  | 51.29591988   | 153.8318182 | 58.78880187  |
| C6orf48     | 220755_s_at | 0.0266329   | 903.6555556  | 204.0097741   | 1031.945455 | 255.2913904  |
| C7orf49     | 220949_s_at | 0.0116563   | 180.2851852  | 35.76537543   | 161.5272727 | 46.04836155  |
| C8orf84     | 214725_at   | 0.00976615  | 17.36666667  | 14.57207551   | 12.96818182 | 8.303951232  |
| C9orf78     | 218116_at   | 0.00525692  | 255.7592593  | 81.7614883    | 325.5909091 | 95.61344252  |
| CA4         | 206208_at   | 0.00897037  | 87.72962963  | 27.42434088   | 59.77727273 | 35.41075881  |
| cab39       | 217873_at   | 0.00555533  | 539.1037037  | 198.8509018   | 623.4318182 | 209.7860052  |
| Cacna1d     | 210108_at   | 0.0179174   | 77.28518519  | 29.43860239   | 109.8227273 | 36.94201289  |
| CACNA1G     | 211314_at   | 0.023876    | 7.244444444  | 4.469669867   | 5.290909091 | 1.885510943  |
| CACNB1      | 210967_x_at | 0.0119178   | 112.6444444  | 51.48191866   | 81.13181818 | 40.43505535  |
| CACYBP      | 211761_s_at | 0.0147856   | 1382.677778  | 339.1182938   | 1693.995455 | 424.912888   |
| CALB1       | 205625_s_at | 0.0197569   | 1764.948148  | 803.4484577   | 2351.213636 | 841.0123442  |
| CALM3       | 211984_at   | 0.0128056   | 6565.425926  | 1642.405138   | 7975.986364 | 2144.486578  |
| camk4       | 210349_at   | 0.013204    | 142.1925926  | 46.79556131   | 187.6454545 | 51.15052229  |
| CAMSAP1     | 212710_at   | 0.000151359 | 453.2148148  | 83.12388671   | 561.8772727 | 98.85524257  |
| CAMSAP1     | 212711_at   | 0.00172382  | 344.8777778  | 81.24148397   | 428.8636364 | 103.6889926  |
| camsap11l   | 212765_at   | 0.000341215 | 1499.962963  | 290.8216466   | 1993.422727 | 469.8836988  |
| camsap11l   | 217196_s_at | 0.0150688   | 222.062963   | 77.04060442   | 276.9090909 | 109.2001261  |
| CAMTA1      | 213268_at   | 0.000428021 | 632.8851852  | 205.5554047   | 855.3045455 | 263.2998535  |
| Canx        | 200068_s_at | 0.0122401   | 2168.555556  | 305.5716778   | 2466.659091 | 431.8118987  |
| CAPRIN2     | 218456_at   | 0.0176216   | 594.6074074  | 194.5214699   | 731.3454545 | 177.4371592  |
| Casc3       | 207842_s_at | 0.0025155   | 556.4777778  | 104.4983781   | 456.8136364 | 112.3632303  |
| casp10      | 210708_x_at | 0.0130554   | 82.40740741  | 30.49683371   | 115.8       | 59.65587825  |
| Cbr3        | 205379_at   | 0.00674431  | 370.9        | 130.399065    | 271.1636364 | 107.8287423  |
| ccdc101     | 48117_at    | 0.0276796   | 192.6518519  | 47.43617875   | 165.4363636 | 70.98001426  |
| CCDC28A     | 209479_at   | 0.00535081  | 526.3        | 144.9004911   | 666.0681818 | 214.0564442  |
| Ccdc47      | 217814_at   | 0.0313124   | 409.0592593  | 146.6571571   | 506.9727273 | 146.4910015  |
| CCDC85B     | 204610_s_at | 0.0208359   | 2708.633333  | 917.6267986   | 1744.381818 | 1003.522228  |
| CCDC90B     | 218288_s_at | 0.0129516   | 477.0407407  | 141.4968748   | 557.4045455 | 129.2542879  |
| Ccl27       | 207955_at   | 0.0307038   | 36.15925926  | 20.88649286   | 25.45       | 20.46094421  |
| CCND3       | 201700_at   | 0.00341562  | 753.6259259  | 145.666425    | 633.6590909 | 109.0682078  |
| CCNF        | 204826_at   | 0.0104375   | 95.86666667  | 47.90720196   | 62.36818182 | 36.45072847  |
| ccno        | 210021_s_at | 0.0236863   | 309.2925926  | 75.14202412   | 250.8318182 | 87.13419528  |

| Gene symbol | Probeset    | P value    | Mean Control | STDEV Control | Mean Heroin | STDEV Heroin |
|-------------|-------------|------------|--------------|---------------|-------------|--------------|
| CCNT2       | 213743_at   | 0.0155604  | 137.7962963  | 53.89737743   | 165.9090909 | 47.85814265  |
| CCR5        | 206991_s_at | 0.0226545  | 53.57777778  | 44.56756611   | 32.74545455 | 16.26912727  |
| CCRL2       | 211434_s_at | 0.0104154  | 45.54444444  | 28.25578679   | 28.5        | 15.70040946  |
| CCT2        | 201947_s_at | 0.0223158  | 1063.4       | 257.9663559   | 1181.2      | 262.0044838  |
| CD2BP2      | 202257_s_at | 0.00493193 | 239.2        | 62.27305257   | 153.0818182 | 85.96337889  |
| CD300A      | 217072_at   | 0.0305683  | 28.54444444  | 18.66026905   | 18.48181818 | 11.4084612   |
| CD302       | 203799_at   | 0.0153714  | 104.3259259  | 35.95877546   | 144.5909091 | 45.02649917  |
| CD40        | 35150_at    | 0.0221499  | 325.3962963  | 65.86943076   | 296.9045455 | 84.83407602  |
| CD47        | 213055_at   | 0.0277624  | 204.462963   | 91.47103849   | 324.4227273 | 175.0018964  |
| Cd53        | 203416_at   | 0.0308855  | 312.5407407  | 96.02406853   | 267.3636364 | 75.15115274  |
| Cd55        | 201926_s_at | 0.0197871  | 75.98148148  | 52.17598945   | 46.00909091 | 30.05659597  |
| CD58        | 216942_s_at | 0.0131889  | 29.52592593  | 23.89611479   | 17.74090909 | 15.68923377  |
| Cd6         | 208602_x_at | 0.0251122  | 17.88518519  | 8.642146444   | 15.85454545 | 6.186908396  |
| CD63        | 200663_at   | 0.0027743  | 2111.744444  | 457.4110728   | 1674.459091 | 444.8527361  |
| CD81        | 200675_at   | 0.00112672 | 2828.514815  | 592.2170884   | 2504.740909 | 528.0457778  |
| Cd8a        | 205758_at   | 0.0330249  | 217.7518519  | 74.18045757   | 288.5909091 | 81.3824066   |
| Cdc123      | 201725_at   | 0.0321556  | 559.0740741  | 122.4908963   | 625.85      | 140.6294244  |
| CDC16       | 209659_s_at | 0.028426   | 554.6407407  | 111.6967745   | 630.8363636 | 116.4968651  |
| CDC37L1     | 219343_at   | 0.022472   | 135          | 29.66262865   | 157.1409091 | 43.01944919  |
| Cdc40       | 203376_at   | 0.0198276  | 609.1962963  | 179.9910008   | 766.7454545 | 183.7192883  |
| Cdc42ep2    | 209850_s_at | 0.00698405 | 148.5925926  | 82.36325696   | 81.76818182 | 61.95562457  |
| CDC42EP3    | 209288_s_at | 0.0223403  | 68.18148148  | 20.1712102    | 88.20909091 | 22.2321498   |
| CDC7        | 204510_at   | 0.00414524 | 165.1925926  | 42.75327181   | 215.3454545 | 54.42180697  |
| CDH11       | 207173_x_at | 0.0161202  | 409.6222222  | 156.8933355   | 549.5545455 | 177.7201243  |
| Cdh12       | 207149_at   | 0.00107432 | 116.2037037  | 40.57541394   | 164.4681818 | 45.17033778  |
| CDH13       | 204726_at   | 0.0322162  | 27.2037037   | 16.51932392   | 16.65       | 11.32522469  |
| Cdh15       | 206328_at   | 0.032816   | 11.21481481  | 7.598466632   | 16.61363636 | 19.42063938  |
| CDH8        | 210518_at   | 0.0325232  | 300.3222222  | 78.09266356   | 327.1318182 | 55.12756105  |
| Cdh9        | 207729_at   | 0.0251329  | 69.58148148  | 20.27319255   | 88.98636364 | 35.2244003   |
| Cdk1        | 210559_s_at | 0.0137982  | 32.61111111  | 20.96194965   | 26.28181818 | 21.26169452  |
| CDK13       | 207318_s_at | 0.00101006 | 305.3037037  | 82.00572908   | 432.3409091 | 125.336407   |
| Cdk17       | 221918_at   | 0.0168531  | 1317.511111  | 475.5486462   | 1785.495455 | 734.2324457  |
| CDKN2A      | 207039_at   | 0.0132818  | 50.38518519  | 28.53616738   | 35.34545455 | 16.91558108  |
| CDKN3       | 209714_s_at | 0.00367168 | 106.0925926  | 23.62780184   | 132.7772727 | 44.13283986  |
| CDO1        | 204154_at   | 0.00508682 | 519.7666667  | 229.2330457   | 720.5045455 | 272.2494138  |
| CEACAM7     | 211848_s_at | 0.011682   | 9.137037037  | 6.450828697   | 6.868181818 | 2.499216327  |
| CELF2       | 202156_s_at | 0.00790149 | 370.5888889  | 188.7388129   | 575.7772727 | 184.2583691  |
| CELF2       | 202157_s_at | 0.00449247 | 1671.396296  | 704.2852102   | 2499.304545 | 827.7051502  |
| CELF2       | 214405_at   | 0.00361492 | 49.43333333  | 32.03794625   | 100.2363636 | 60.65440388  |
| CEND1       | 219591_at   | 0.00923391 | 801.4037037  | 212.0917027   | 647.2681818 | 151.5446198  |

| Gene symbol | Probeset    | P value     | Mean Control | STDEV Control | Mean Heroin | STDEV Heroin |
|-------------|-------------|-------------|--------------|---------------|-------------|--------------|
| CENPC1      | 204739_at   | 0.00495314  | 65.55185185  | 23.63955893   | 85.82727273 | 19.73725464  |
| CEP170      | 207719_x_at | 0.00783428  | 582.8777778  | 132.5396032   | 732.55      | 174.5015452  |
| Cep68       | 212677_s_at | 0.0165303   | 508.037037   | 137.82432     | 539.3954545 | 101.9517135  |
| CEP76       | 52285_f_at  | 0.0307523   | 37.92222222  | 14.46856894   | 48.67727273 | 22.1812433   |
| CFH         | 213800_at   | 0.0253538   | 39.81111111  | 29.94569872   | 23.44090909 | 16.5877654   |
| CHAF1A      | 203975_s_at | 0.00103658  | 90.56296296  | 42.14596566   | 50.76818182 | 26.50479537  |
| chat        | 221197_s_at | 0.0234125   | 44.08888889  | 20.92115847   | 38.06363636 | 27.08395317  |
| CHCHD3      | 217972_at   | 0.0322109   | 283.8851852  | 49.94103218   | 324.5136364 | 59.24605911  |
| CHD1        | 204258_at   | 0.00340645  | 84.99259259  | 40.30560112   | 150.6954545 | 68.85782092  |
| CHD9        | 212616_at   | 0.000321711 | 269.3518519  | 103.655956    | 472.1681818 | 180.5165878  |
| CHL1        | 204591_at   | 0.0118573   | 587.8814815  | 203.7315523   | 795.8590909 | 275.8811194  |
| CHMP1B      | 218177_at   | 0.0305521   | 167.4703704  | 81.6521789    | 136.7590909 | 57.80468476  |
| CHMP2A      | 202121_s_at | 0.00403976  | 1143.87037   | 207.5094174   | 836.9136364 | 282.148332   |
| CHMP4A      | 218571_s_at | 0.0178954   | 840.1518519  | 289.9113145   | 593.9272727 | 191.1003705  |
| CHMP6       | 218743_at   | 0.0210188   | 197.4555556  | 45.24360842   | 155.3363636 | 48.65666445  |
| Chn2        | 213385_at   | 0.0221647   | 493.0296296  | 146.4184068   | 599.8909091 | 189.2833223  |
| CHORDC1     | 218566_s_at | 0.00573407  | 201.9259259  | 85.71778647   | 286.1863636 | 87.90733918  |
| CHRD        | 211248_s_at | 0.00991167  | 103          | 39.43936924   | 81.17727273 | 46.55714289  |
| CHRM3       | 214596_at   | 0.0240509   | 147.4074074  | 119.351607    | 196.3409091 | 112.5886726  |
| CHRNA6      | 207568_at   | 0.00450729  | 119.7407407  | 41.70717757   | 143.5681818 | 55.30061901  |
| CHRNA9      | 221107_at   | 0.00615913  | 85.97407407  | 36.49150157   | 115.7954545 | 56.11520868  |
| Chrb4       | 207516_at   | 0.0309191   | 33.38148148  | 18.24451524   | 21.05909091 | 19.4485563   |
| CIAPIN1     | 208968_s_at | 0.0245953   | 487.2962963  | 124.1237022   | 412.0363636 | 73.4115376   |
| CIB1        | 201953_at   | 0.000667348 | 419.3        | 79.74697486   | 354.4772727 | 101.859478   |
| CINP        | 217598_at   | 0.00871995  | 67.6037037   | 27.75669679   | 46.35909091 | 28.46295268  |
| Cirbp       | 200811_at   | 0.00691398  | 1760.762963  | 510.0851604   | 1455.622727 | 349.1984031  |
| Ciz1        | 211358_s_at | 0.00616193  | 173.5444444  | 44.8641825    | 135.7272727 | 42.910862    |
| Ckap2       | 218252_at   | 0.0226637   | 177.4222222  | 47.99943376   | 233.9863636 | 80.27783478  |
| CKB         | 200884_at   | 0.0115203   | 5215.8       | 1076.764488   | 4019.609091 | 1054.028231  |
| ckmt2       | 205295_at   | 0.0148102   | 131.4777778  | 31.60858371   | 111.9818182 | 21.24074334  |
| CLCA2       | 206166_s_at | 0.0163929   | 50.68888889  | 22.25439167   | 42.00909091 | 35.07227787  |
| Clcn3       | 201733_at   | 0.00735751  | 215.6074074  | 98.05216008   | 288.8045455 | 115.6923444  |
| Clcn3       | 201734_at   | 0.00185912  | 1004.292593  | 276.8798711   | 1399.068182 | 405.4753875  |
| Clcn3       | 201735_s_at | 0.0276323   | 347.237037   | 107.1679672   | 422.3772727 | 124.1342704  |
| CLCN7       | 38069_at    | 0.00415731  | 497.5666667  | 155.5779671   | 416.6863636 | 62.57600556  |
| CLDN5       | 204482_at   | 0.0110054   | 577.4296296  | 242.4794215   | 413.4545455 | 237.1992607  |
| CLEC5A      | 219890_at   | 0.0182993   | 63.62592593  | 26.95696845   | 56.90909091 | 31.53046764  |
| CLIC1       | 208659_at   | 0.00350071  | 198.0592593  | 67.36602236   | 132.5       | 56.91978483  |
| clint1      | 201769_at   | 0.0042545   | 298.1148148  | 81.38560024   | 415.95      | 138.6178053  |
| clu         | 208791_at   | 0.0166753   | 6950.288889  | 2190.52863    | 6267.890909 | 2442.857094  |

| Gene symbol | Probeset    | P value     | Mean Control | STDEV Control | Mean Heroin | STDEV Heroin |
|-------------|-------------|-------------|--------------|---------------|-------------|--------------|
| clu         | 208792_s_at | 0.00278639  | 6507.522222  | 1465.645808   | 5412.027273 | 1852.823151  |
| cndp2       | 217752_s_at | 0.0285243   | 1516.362963  | 345.0616379   | 1181.522727 | 378.8517714  |
| CNOT4       | 203291_at   | 0.00415125  | 230.9296296  | 58.98273421   | 284.0590909 | 52.65766945  |
| cnot8       | 202162_s_at | 0.023614    | 81.84074074  | 43.951409     | 67.65909091 | 35.94364185  |
| CNTNAP2     | 219301_s_at | 0.00242499  | 277.9703704  | 136.423393    | 330.4772727 | 128.1226307  |
| CNTNAP2     | 219302_s_at | 0.00659163  | 48.76296296  | 15.86379885   | 61.95       | 24.63904663  |
| Cobll1      | 203642_s_at | 0.0171337   | 79.74074074  | 33.13718872   | 115.8090909 | 69.54175799  |
| Cobll1      | 211032_at   | 0.00934245  | 6.781481481  | 10.04604924   | 3.354545455 | 4.433823167  |
| COG2        | 203073_at   | 0.0123443   | 344.8333333  | 70.84897263   | 307.1363636 | 82.68790172  |
| Cog4        | 212189_s_at | 0.0024709   | 293.2037037  | 82.92975935   | 218.3909091 | 68.4115829   |
| COL1A1      | 217430_x_at | 0.00239059  | 188.6555556  | 64.32104174   | 140.4681818 | 44.07861361  |
| COL6A1      | 212091_s_at | 0.00773355  | 17.20740741  | 7.942772521   | 12.98636364 | 6.934131968  |
| COL6A1      | 212938_at   | 0.0154192   | 51.28888889  | 24.64352518   | 42.76363636 | 43.09266367  |
| COL6A1      | 212939_at   | 0.00523132  | 10.06296296  | 5.659787176   | 7.622727273 | 2.228801048  |
| Col6a3      | 201438_at   | 0.0224092   | 20.3037037   | 13.70725472   | 10.82727273 | 5.985711703  |
| Commd3      | 218048_at   | 0.0270139   | 749.9925926  | 317.5337667   | 588         | 135.286289   |
| COMMMD4     | 206441_s_at | 0.000492255 | 184.4592593  | 52.33568616   | 123.5818182 | 69.33180151  |
| COMMMD4     | 209132_s_at | 0.0119644   | 255.0555556  | 60.72711556   | 187.4818182 | 62.99389718  |
| COMT        | 213981_at   | 0.00974655  | 78.6962963   | 20.93380559   | 59.52727273 | 25.13195996  |
| copA        | 214337_at   | 0.0109424   | 20.30740741  | 17.65942603   | 17.23181818 | 9.277540025  |
| COPG2IT1    | 213486_at   | 0.020686    | 834.1814815  | 422.5273665   | 1144.718182 | 441.9597974  |
| Cops6       | 201405_s_at | 0.0118693   | 1262.877778  | 345.7266921   | 1036.936364 | 235.1817181  |
| COQ3        | 221227_x_at | 0.00633625  | 239.0037037  | 41.80522126   | 258.2590909 | 32.11412179  |
| Coro1a      | 209083_at   | 0.0142618   | 243.9148148  | 99.27826745   | 175.0954545 | 73.22425748  |
| COX4I1      | 200086_s_at | 0.00291187  | 4979.314815  | 911.1425058   | 3773.763636 | 981.3293974  |
| COX4I1      | 202698_x_at | 0.0137224   | 8512.981481  | 1462.942645   | 6723.245455 | 1814.918893  |
| Cps1        | 217564_s_at | 0.0153135   | 31.55925926  | 22.54754394   | 21.56818182 | 19.90231828  |
| CREB1       | 204314_s_at | 0.0292732   | 80.84444444  | 26.04505465   | 96.81818182 | 26.6863196   |
| creb3       | 209432_s_at | 0.00340287  | 791.2888889  | 265.8211217   | 610.4090909 | 152.2678621  |
| Crebzf      | 202979_s_at | 0.000647846 | 40.62962963  | 12.81005659   | 59          | 18.95184373  |
| Crem        | 209967_s_at | 0.0183847   | 194.5740741  | 80.74654835   | 284.6454545 | 128.6447775  |
| crh         | 205630_at   | 0.0318601   | 168.2407407  | 79.01463477   | 223.1       | 109.9356955  |
| CRHR1       | 214619_at   | 0.0218602   | 99.46666667  | 36.43881067   | 78.97727273 | 33.53866187  |
| CRISP2      | 210262_at   | 0.000348697 | 15.51111111  | 12.96881862   | 27.44545455 | 20.64820359  |
| crk         | 202225_at   | 0.0282138   | 203.362963   | 62.76536985   | 253.7727273 | 66.23469945  |
| Crocc       | 216419_at   | 0.0108525   | 58.24814815  | 31.42567997   | 47.25909091 | 30.24493124  |
| CROCCL2     | 219139_s_at | 0.0300732   | 44.7         | 26.77911069   | 63.47272727 | 35.30777847  |
| CRYBA2      | 220136_s_at | 0.00222998  | 7.766666667  | 5.720543277   | 3.859090909 | 1.348247219  |
| csnk1a1     | 208866_at   | 0.00548661  | 85.62592593  | 27.28695931   | 110.2090909 | 24.0533318   |
| Csnk1g3     | 220768_s_at | 0.00792403  | 145.6814815  | 35.93259755   | 192.5       | 63.84654967  |

| Gene symbol | Probeset    | P value     | Mean Control | STDEV Control | Mean Heroin | STDEV Heroin |
|-------------|-------------|-------------|--------------|---------------|-------------|--------------|
| cspg4       | 214297_at   | 0.0222258   | 74.88888889  | 63.1009529    | 45.7        | 33.46164827  |
| CSRNP3      | 220462_at   | 0.000485314 | 565.3074074  | 178.367945    | 768.4727273 | 203.4341971  |
| CSRP1       | 200621_at   | 0.0115499   | 2898.544444  | 1265.110694   | 2293.318182 | 1080.282882  |
| cstA        | 204971_at   | 0.0309136   | 39.31111111  | 30.22932012   | 31.29545455 | 15.88291917  |
| CTAG1B      | 217339_x_at | 0.00242374  | 21.82222222  | 18.08629599   | 13.51363636 | 7.448444737  |
| Ctbp1       | 213980_s_at | 0.00120032  | 1422.888889  | 457.6670408   | 1077.636364 | 307.128288   |
| Ctdsp1      | 217844_at   | 0.0114472   | 357.9703704  | 99.37735702   | 288.8454545 | 102.1483036  |
| Ctnna2      | 205373_at   | 0.000872418 | 493.037037   | 145.9123476   | 624.7090909 | 165.9222908  |
| CTNBL1      | 221021_s_at | 0.00972852  | 245.7259259  | 43.65611767   | 205.1818182 | 30.27629336  |
| ctps2       | 219080_s_at | 0.0330733   | 62.43333333  | 27.62167488   | 54.22727273 | 23.93031912  |
| CUEDC2      | 218097_s_at | 0.0215896   | 1489.025926  | 370.3637532   | 1216.813636 | 285.9543442  |
| CUL4B       | 202214_s_at | 0.00598407  | 481          | 148.340816    | 664.6954545 | 228.8104029  |
| CUL5        | 203531_at   | 0.0113953   | 567.2481481  | 168.3920663   | 683.3909091 | 171.0561671  |
| CXorf1      | 206711_at   | 0.00320971  | 156.5222222  | 62.97238304   | 209.1090909 | 53.40660659  |
| CYB561      | 217200_x_at | 0.0224056   | 500.9074074  | 78.77295966   | 456.8954545 | 100.6122187  |
| CYB561D2    | 209665_at   | 0.0234692   | 241.2074074  | 49.66840759   | 186.5636364 | 65.44957743  |
| CYB5R1      | 202263_at   | 0.0216668   | 545.9777778  | 137.6170029   | 469.5636364 | 94.62376398  |
| CYBB        | 203922_s_at | 0.0133038   | 98.39259259  | 34.70470957   | 87.44090909 | 35.34008461  |
| CYCS        | 208905_at   | 0.0182437   | 2991.485185  | 833.6032513   | 3378.431818 | 775.8767289  |
| CYFIP2      | 220999_s_at | 0.007586    | 607.1111111  | 194.3445955   | 767.1636364 | 225.7618774  |
| CYLD        | 213295_at   | 0.000180164 | 552.3333333  | 160.1866844   | 756.2136364 | 172.3949267  |
| CYLD        | 39582_at    | 0.000137557 | 277.9296296  | 76.6117425    | 376.6272727 | 89.88178576  |
| CYP1B1      | 202436_s_at | 0.00605441  | 195.6740741  | 76.58083006   | 241.3818182 | 71.40106466  |
| cyp20a1     | 219565_at   | 0.0203232   | 3.492592593  | 1.214313965   | 4.972727273 | 2.382112272  |
| cyp2j2      | 205073_at   | 0.0255498   | 191.8666667  | 78.11200538   | 168.2681818 | 60.73667901  |
| cyr61       | 201289_at   | 0.0223627   | 125.2185185  | 72.2990586    | 186.9681818 | 78.90582323  |
| Cyth3       | 206523_at   | 0.0152714   | 9.544444444  | 11.08111121   | 5.895454545 | 2.746162218  |
| Dach1       | 205471_s_at | 0.0170013   | 229.5111111  | 72.63745237   | 289.1363636 | 105.9534064  |
| DAPK1       | 203139_at   | 0.0251031   | 814.5666667  | 208.433522    | 928.2045455 | 217.7226206  |
| DAPK2       | 206324_s_at | 0.0255508   | 59.32962963  | 34.73664453   | 39.98636364 | 31.63386214  |
| DAXX        | 216038_x_at | 0.00579885  | 122.7444444  | 45.92483268   | 95.84545455 | 36.28475644  |
| dcaf11      | 201886_at   | 0.00739632  | 438.2740741  | 104.2767715   | 336.7590909 | 93.03010603  |
| DCAF6       | 217908_s_at | 0.00944723  | 263.0703704  | 63.45770739   | 293.3136364 | 70.91459179  |
| DCLK1       | 205399_at   | 0.00450278  | 1751.048148  | 694.8817217   | 1999.027273 | 600.5437696  |
| DCLK1       | 215303_at   | 0.000259968 | 330.4407407  | 121.113044    | 479.0772727 | 189.4774266  |
| dcp2        | 212919_at   | 0.00302426  | 320.2666667  | 80.54461258   | 419.5909091 | 91.40505826  |
| dct         | 216512_s_at | 0.0275573   | 64.54814815  | 29.62303379   | 88.77727273 | 38.93285957  |
| Dctn5       | 209232_s_at | 0.0213724   | 274.4962963  | 79.92151189   | 201.5045455 | 70.03562683  |
| dcun1d4     | 212855_at   | 0.00414563  | 133.4259259  | 45.3706665    | 189.5636364 | 65.21146222  |
| dcun1d4     | 212851_at   | 0.0222436   | 149.2481481  | 38.98863119   | 181.4863636 | 41.42955347  |

| Gene symbol   | Probeset    | P value     | Mean Control | STDEV Control | Mean Heroin | STDEV Heroin |
|---------------|-------------|-------------|--------------|---------------|-------------|--------------|
| DCX           | 204850_s_at | 0.00417904  | 283.8777778  | 151.1781764   | 352.75      | 97.55621944  |
| DCX           | 204851_s_at | 0.000535947 | 135.2740741  | 59.47982588   | 204.8454545 | 72.20195702  |
| DCXR          | 217973_at   | 0.0205112   | 1014.255556  | 394.1864361   | 790.5136364 | 346.0840227  |
| DDHD2         | 212690_at   | 0.00112408  | 765.5777778  | 189.7512305   | 956.2409091 | 266.5604258  |
| DDOST         | 208675_s_at | 0.000933848 | 730.5666667  | 256.4379712   | 571.8181818 | 137.4967035  |
| DDOST         | 208674_x_at | 0.030759    | 546.3444444  | 141.8354717   | 453.6272727 | 75.47715632  |
| ddt           | 202929_s_at | 0.0218053   | 272.1703704  | 98.34015071   | 214.1727273 | 79.00531737  |
| ddx10         | 204977_at   | 0.0154772   | 316.5444444  | 51.20865562   | 365.1227273 | 48.20565993  |
| DDX18         | 208896_at   | 0.0160477   | 108.4592593  | 39.92224423   | 151.8545455 | 46.60946897  |
| DDX3X         | 201211_s_at | 0.0132246   | 44.5         | 28.88588956   | 29.80909091 | 22.58326201  |
| ddx56         | 217754_at   | 0.0251116   | 362.1148148  | 74.24183821   | 315.6727273 | 64.98169106  |
| dedD          | 215158_s_at | 0.0218535   | 362.9259259  | 111.2268389   | 309.8636364 | 68.63140018  |
| DEFA1         | 205033_s_at | 0.0170927   | 90.43703704  | 35.19665793   | 82.15454545 | 36.72908186  |
| dennd1a       | 219763_at   | 0.00452222  | 87.61111111  | 39.21056896   | 75.00909091 | 40.81226367  |
| DENND2A       | 53991_at    | 0.0120325   | 189.5703704  | 80.45654735   | 146.6090909 | 35.82875819  |
| DENND5B       | 215058_at   | 0.00884385  | 43.9037037   | 18.97325003   | 64.81818182 | 31.14604059  |
| Dgcr14        | 204383_at   | 0.0137431   | 165.5407407  | 39.67882849   | 145.0909091 | 36.09991306  |
| Dgcr14        | 216145_at   | 0.0213303   | 18.28518519  | 12.60737585   | 41.15454545 | 35.82225601  |
| DGKI          | 206806_at   | 0.0132298   | 167.7740741  | 60.69101183   | 235.3681818 | 86.59569651  |
| dhodh         | 213632_at   | 0.0183378   | 85.21481481  | 37.96538609   | 75.51363636 | 31.19786768  |
| dhps          | 207831_x_at | 0.0266291   | 382.9074074  | 184.7353199   | 268.1636364 | 112.7423255  |
| Dhrs4         | 218021_at   | 0.00613482  | 242.6666667  | 50.69998483   | 203.1636364 | 43.8054633   |
| dhrs9         | 219799_s_at | 0.0119369   | 212.1185185  | 75.98432549   | 166.0409091 | 68.93139902  |
| DHX8          | 203334_at   | 0.0254719   | 29.05925926  | 23.38647307   | 15.65454545 | 5.851473341  |
| DIAPH2        | 205726_at   | 0.000160629 | 475.6814815  | 145.2197778   | 673.3454545 | 141.8377266  |
| DICER1        | 212888_at   | 0.0254795   | 344.4666667  | 95.59832635   | 451.9727273 | 133.2726785  |
| Dimt1l        | 217106_x_at | 0.0190926   | 393.2814815  | 79.49027535   | 510.1363636 | 164.9459523  |
| Dimt1l        | 210801_at   | 0.027608    | 30.95925926  | 11.765571     | 33.18181818 | 11.33492859  |
| DIRAS2        | 219619_at   | 0.0234353   | 550.2185185  | 230.7467594   | 639.3727273 | 232.7333548  |
| DKFZP586K1520 | 217220_at   | 0.00875638  | 21.86296296  | 14.42012878   | 32.91363636 | 16.1205369   |
| dlaT          | 213149_at   | 0.00869479  | 225.0111111  | 60.60744644   | 257.4227273 | 70.09155191  |
| DLEU2L        | 216870_x_at | 0.00326565  | 82.92222222  | 28.48102382   | 126.6       | 48.9037344   |
| DLG1          | 202515_at   | 0.0149317   | 1497.533333  | 339.3344685   | 1718.390909 | 316.3590033  |
| DLGAP2        | 210227_at   | 0.00260781  | 454.6814815  | 146.9539568   | 609.1272727 | 160.6297938  |
| DLGAP2        | 216916_s_at | 0.00179491  | 13.94814815  | 4.070755966   | 18.14090909 | 6.284497865  |
| Dlx2          | 215685_s_at | 0.00867228  | 103.0148148  | 33.79980318   | 79.76818182 | 26.4138922   |
| dmd           | 203881_s_at | 0.00754232  | 207.0037037  | 56.45638535   | 289.7818182 | 105.7903346  |
| Dmp1          | 217067_s_at | 0.0299297   | 19.58888889  | 16.14690571   | 14.89545455 | 14.23049968  |
| Dmtf1         | 203301_s_at | 0.00253554  | 316.1074074  | 68.67527786   | 390.5909091 | 79.52337128  |
| DMXL2         | 212820_at   | 0.000347694 | 480.4074074  | 130.712088    | 620.5681818 | 138.1358351  |

| Gene symbol | Probeset    | P value     | Mean Control | STDEV Control | Mean Heroin | STDEV Heroin |
|-------------|-------------|-------------|--------------|---------------|-------------|--------------|
| Dnajb14     | 219237_s_at | 0.00410038  | 278.3037037  | 84.72711618   | 399.3545455 | 151.1367458  |
| dnajc12     | 218976_at   | 0.000209824 | 804.8148148  | 142.0135386   | 987.7045455 | 201.4433619  |
| DNAJC13     | 212467_at   | 0.00867015  | 121.8037037  | 46.11235844   | 152.8409091 | 42.67371957  |
| DNAJC17     | 219861_at   | 0.0268246   | 74.33703704  | 20.71408195   | 54.2        | 23.49569363  |
| DNAJC8      | 205545_x_at | 0.00914947  | 569.037037   | 93.68043531   | 501.7954545 | 70.07114396  |
| dnajc9      | 213088_s_at | 0.0264428   | 261.0888889  | 72.54140639   | 314.5863636 | 57.41227093  |
| DNM3        | 209839_at   | 0.00136204  | 710.3        | 237.6885211   | 1027.745455 | 382.5702546  |
| Dok1        | 216835_s_at | 0.0206372   | 125.6592593  | 46.54648842   | 110.0545455 | 37.24755955  |
| Dok4        | 209691_s_at | 0.02796     | 59.61111111  | 25.16078043   | 46.71363636 | 30.17118296  |
| dopey1      | 213271_s_at | 0.00213821  | 398.6925926  | 80.94393086   | 517.4363636 | 120.6668556  |
| DPH5        | 222360_at   | 0.0228205   | 91.91481481  | 27.585332     | 111.9863636 | 28.73755292  |
| dpm3        | 219373_at   | 0.0133535   | 374.1074074  | 125.2251355   | 271.1318182 | 117.4152354  |
| DPP4        | 211478_s_at | 0.0326563   | 12.33703704  | 13.55618361   | 24.17727273 | 20.31197001  |
| Dpp6        | 207789_s_at | 0.0157817   | 672.1296296  | 161.1946191   | 751.4090909 | 211.739559   |
| Dpp8        | 220939_s_at | 0.0121261   | 263.4259259  | 74.57067681   | 324.2818182 | 77.1784243   |
| DPY19L1     | 215433_at   | 0.0268262   | 36.84814815  | 15.96998074   | 52.24090909 | 24.21118709  |
| DPY19L2P2   | 215143_at   | 0.00623286  | 342.0851852  | 101.6818254   | 423.4818182 | 141.1379387  |
| DPYS        | 206065_s_at | 0.0310846   | 40.31481481  | 22.46329833   | 60.69545455 | 25.30182522  |
| DST         | 204455_at   | 0.0102862   | 22.41851852  | 21.21440072   | 33.42272727 | 20.40377957  |
| DSTYK       | 211515_s_at | 0.0260074   | 100.0555556  | 31.64388789   | 129.1363636 | 49.33530124  |
| DTNB        | 214253_s_at | 0.00436252  | 184.1259259  | 50.15948099   | 135.7954545 | 47.87066382  |
| DUX1        | 208176_at   | 0.00612909  | 17.94074074  | 9.801148255   | 14.4        | 6.100273218  |
| DYNC2H1     | 219469_at   | 0.0198221   | 124.4037037  | 44.67621533   | 158.2454545 | 38.40002142  |
| DYNC2LI1    | 203762_s_at | 0.0109485   | 124.8666667  | 48.33697422   | 157.6681818 | 29.569247    |
| DYNLT3      | 203303_at   | 0.00219189  | 1371.018519  | 386.3192373   | 1707.913636 | 431.5752898  |
| dyrk2       | 202971_s_at | 0.00603668  | 32.92962963  | 19.61543377   | 59.42727273 | 37.78504594  |
| Dyrk4       | 212954_at   | 0.0216518   | 247.162963   | 56.53725217   | 190.5954545 | 72.20002953  |
| DZIP1       | 204556_s_at | 0.0149864   | 237.2259259  | 61.08722385   | 305.9045455 | 76.6617585   |
| DZIP1       | 204557_s_at | 0.000397671 | 140.4259259  | 52.5816405    | 227.3272727 | 72.29983983  |
| DZIP3       | 207231_at   | 0.00912662  | 101.1037037  | 53.92706957   | 155.4772727 | 67.84355205  |
| E2F3        | 203692_s_at | 0.0087639   | 140.7333333  | 47.42778316   | 174.1090909 | 62.03753019  |
| E4F1        | 218524_at   | 0.0285037   | 151.7666667  | 49.44393873   | 116.8409091 | 44.85284574  |
| Echs1       | 201135_at   | 0.0234513   | 1864.159259  | 338.009256    | 1440.677273 | 415.1562035  |
| Ecsit       | 218225_at   | 0.0147098   | 494.4296296  | 152.8105836   | 344.7409091 | 137.1355175  |
| eda         | 206217_at   | 0.00427247  | 164.3592593  | 50.09150288   | 136.1818182 | 40.26706839  |
| EDNRA       | 204463_s_at | 0.00637917  | 17.94814815  | 13.75640747   | 36.34090909 | 27.84555464  |
| EEF1A1      | 213614_x_at | 0.019564    | 13009.12593  | 2577.413309   | 11626.14545 | 2616.396777  |
| EEF1D       | 203113_s_at | 0.00302121  | 1661.174074  | 525.05518     | 1117.140909 | 430.5480712  |
| EEF1D       | 214394_x_at | 0.00748064  | 2842.581481  | 1561.203968   | 1787.845455 | 849.5056824  |
| EFEMP2      | 206580_s_at | 0.000659537 | 453.4407407  | 145.911167    | 348.45      | 81.50538253  |



| Gene symbol | Probeset    | P value     | Mean Control | STDEV Control | Mean Heroin | STDEV Heroin |
|-------------|-------------|-------------|--------------|---------------|-------------|--------------|
| EFEMP2      | 209356_x_at | 0.00760661  | 201.937037   | 40.26716689   | 177.5       | 54.00534365  |
| EFR3A       | 212149_at   | 0.00262335  | 402.9777778  | 80.32616363   | 525.0909091 | 117.5439286  |
| EFR3A       | 212150_at   | 0.00103081  | 298.6148148  | 83.74746703   | 381.6227273 | 100.3343882  |
| Egr1        | 201693_s_at | 0.0212444   | 181.262963   | 64.79154235   | 258.5590909 | 146.1781974  |
| EHBP1       | 212653_s_at | 0.00132959  | 556.3555556  | 192.0173897   | 741.25      | 202.1905248  |
| EHD1        | 209037_s_at | 0.0145814   | 43.71851852  | 22.17703311   | 30.26363636 | 20.35484137  |
| Ehd2        | 221870_at   | 0.00934328  | 36.85925926  | 20.11633969   | 28.21818182 | 19.36903853  |
| EIF1AX      | 201017_at   | 0.00910618  | 172.0925926  | 97.78613999   | 294.0863636 | 185.3343113  |
| EIF2AK2     | 213294_at   | 0.000288753 | 358.7296296  | 102.73167     | 528.0909091 | 132.2995947  |
| EIF3B       | 203462_x_at | 0.00909066  | 922.2037037  | 195.6532814   | 709.1772727 | 192.4695818  |
| EIF3B       | 211501_s_at | 0.00929453  | 280.2518519  | 54.03182374   | 218.0272727 | 66.43850133  |
| Eif3e       | 208697_s_at | 0.00212201  | 1359.233333  | 330.194763    | 1681.677273 | 417.4736877  |
| Eif3f       | 200023_s_at | 0.0298279   | 1568.366667  | 546.9504217   | 1288.577273 | 297.5904727  |
| eif3g       | 208887_at   | 0.00686957  | 814.7        | 280.0454963   | 580.3409091 | 177.4840963  |
| EIF3J       | 208985_s_at | 0.0196975   | 347.9555556  | 94.75048339   | 411.8727273 | 73.13137677  |
| EIF3K       | 210501_x_at | 0.00754329  | 1980.422222  | 603.4051282   | 1500.463636 | 373.3456149  |
| EIF3K       | 212716_s_at | 0.00226817  | 2000.440741  | 456.011498    | 1470.772727 | 350.7147439  |
| EIF3K       | 221494_x_at | 0.00565705  | 2077.462963  | 472.8894448   | 1609.622727 | 339.2080636  |
| EIF4E2      | 209393_s_at | 0.0085636   | 100.8037037  | 37.22602978   | 78.46363636 | 34.39415157  |
| Eif4ebp2    | 208770_s_at | 0.00145664  | 242.2481481  | 54.63098142   | 190.8454545 | 39.87646074  |
| Eif4g1      | 208625_s_at | 0.0163341   | 346.7851852  | 83.99747571   | 319.8954545 | 69.40822291  |
| eIF6        | 210213_s_at | 0.00875552  | 498.1925926  | 168.2824776   | 376.3681818 | 84.51294849  |
| ELAVL3      | 206338_at   | 0.0138038   | 96.61111111  | 92.50999253   | 60.93181818 | 41.78728887  |
| elf3        | 201510_at   | 0.0192834   | 42.9         | 29.06036158   | 57.62272727 | 32.29220652  |
| ELOVL4      | 219532_at   | 0.000655297 | 256.2037037  | 88.28832784   | 306.2954545 | 92.87821251  |
| ELTD1       | 219134_at   | 0.00453092  | 43.81111111  | 23.88854462   | 28.72272727 | 12.1099696   |
| emd         | 209477_at   | 0.0303914   | 244.0444444  | 50.00087948   | 215.9136364 | 59.85249564  |
| EMG1        | 209233_at   | 0.0049765   | 319.9703704  | 99.28109207   | 247.2772727 | 77.4246788   |
| EML1        | 204797_s_at | 0.00505682  | 339.3666667  | 73.61241012   | 383.7727273 | 75.07328598  |
| Enc1        | 201340_s_at | 0.0234613   | 1108.222222  | 350.5681853   | 1366.095455 | 484.9265791  |
| ENG         | 201809_s_at | 0.00668957  | 184.2444444  | 47.52215947   | 136.8136364 | 50.19975617  |
| ENO3        | 204483_at   | 0.0108298   | 57.05925926  | 27.18676515   | 38.95454545 | 19.8471475   |
| entpd4      | 204076_at   | 0.00293187  | 454.1777778  | 171.8540108   | 582.8818182 | 240.1080246  |
| EPHA4       | 206114_at   | 0.00723632  | 325.4259259  | 105.695148    | 400.7772727 | 128.4256944  |
| EPM2AIP1    | 202909_at   | 0.00709135  | 423.9518519  | 124.4766965   | 533.0363636 | 126.9186186  |
| EPS15       | 217886_at   | 0.0258423   | 592          | 196.4175869   | 657.7681818 | 142.3690522  |
| EPS15L2     | 207750_at   | 0.0169562   | 4.837037037  | 8.230251335   | 1.818181818 | 0.928201725  |
| EPX         | 214627_at   | 0.0326953   | 89.53333333  | 63.05731825   | 128.7590909 | 76.97113658  |
| ErbB4       | 214053_at   | 0.00128884  | 764.862963   | 233.065077    | 1041.3      | 338.9480463  |
| ERC2        | 213938_at   | 0.00295353  | 254.0259259  | 73.21731927   | 356.6772727 | 116.4739617  |

| Gene symbol | Probeset    | P value    | Mean Control | STDEV Control | Mean Heroin | STDEV Heroin |
|-------------|-------------|------------|--------------|---------------|-------------|--------------|
| Erc1        | 203719_at   | 0.0294221  | 393.4666667  | 153.8637334   | 274.7590909 | 90.88621174  |
| ergic2      | 218135_at   | 0.0119027  | 156.5777778  | 55.15260182   | 213.1272727 | 74.9126487   |
| ERP29       | 201216_at   | 0.00478144 | 837.6037037  | 226.155594    | 608.75      | 210.396566   |
| ESPL1       | 204817_at   | 0.0144137  | 79.22592593  | 45.49203305   | 55.78636364 | 36.75123964  |
| Esr1        | 211235_s_at | 0.0266146  | 24.67777778  | 18.8959567    | 36.52272727 | 22.12664698  |
| etf1        | 201573_s_at | 0.017433   | 328.5814815  | 78.11305435   | 278.4272727 | 31.81440497  |
| etf1        | 201574_at   | 0.0100477  | 529.8148148  | 125.3502653   | 584.0909091 | 116.6775814  |
| etv1        | 221911_at   | 0.00291689 | 247.4518519  | 80.91065048   | 331.6727273 | 102.4763442  |
| ETV6        | 205585_at   | 0.0317399  | 28.86666667  | 12.27602416   | 36.26363636 | 14.67617264  |
| Evi2a       | 204774_at   | 0.0154904  | 921.637037   | 571.5519535   | 525.5363636 | 300.4724178  |
| EXOC3       | 212630_at   | 0.0046795  | 323.6518519  | 125.4665735   | 178.0818182 | 118.5120152  |
| Exosc4      | 218695_at   | 0.0146836  | 283.6740741  | 141.8114826   | 169.75      | 109.004752   |
| Exosc4      | 58696_at    | 0.00401899 | 520.8740741  | 170.3735502   | 380.8863636 | 107.7551426  |
| Exosc4      | 91684_g_at  | 0.00364589 | 193.4925926  | 76.15539238   | 150.7727273 | 43.14778791  |
| EXPH5       | 213929_at   | 0.0128687  | 53.57037037  | 20.25103634   | 74.18636364 | 38.65949394  |
| EXTL1       | 206329_at   | 0.0076416  | 72.11851852  | 27.137301     | 46.83181818 | 25.31802269  |
| EZH1        | 211310_at   | 0.0165112  | 10.83333333  | 8.672680359   | 20.71363636 | 18.14988641  |
| EZH1        | 32259_at    | 0.0250566  | 632.3111111  | 148.7603114   | 530.0590909 | 129.9248342  |
| EZR         | 217230_at   | 0.0253632  | 10.2962963   | 3.648127178   | 9.363636364 | 3.405114564  |
| F13A1       | 203305_at   | 0.0219525  | 152.8555556  | 30.76544432   | 132.5772727 | 53.52409277  |
| FAF1        | 218080_x_at | 0.0216413  | 263.9666667  | 55.51414234   | 233.2272727 | 32.96659466  |
| FAH         | 202862_at   | 0.0191857  | 154.1148148  | 38.06081878   | 133.4636364 | 47.52745117  |
| Fahd2a      | 218504_at   | 0.00240421 | 344.1518519  | 96.27436503   | 285.7590909 | 66.30361377  |
| Fam105a     | 214947_at   | 0.0263884  | 43.11111111  | 25.69753555   | 67.95       | 49.19661961  |
| fam107a     | 207547_s_at | 0.00589963 | 1994.866667  | 701.66607     | 1754.7      | 633.8392638  |
| fam107a     | 209074_s_at | 0.0201538  | 3593.622222  | 1095.497013   | 3075.845455 | 1068.533205  |
| FAM120A     | 200774_at   | 0.0181777  | 414.2740741  | 183.3823089   | 565.0227273 | 189.1067069  |
| FAM13B      | 218518_at   | 0.0186659  | 518.3407407  | 171.264845    | 619.4681818 | 225.1980512  |
| FAM153B     | 214945_at   | 0.0130756  | 350.1407407  | 219.8357871   | 494.6727273 | 214.8922503  |
| FAM169A     | 213954_at   | 0.0100069  | 198.2962963  | 63.43811934   | 287.4045455 | 121.6001663  |
| fam171a1    | 212771_at   | 0.0271603  | 2077.044444  | 444.5020527   | 2311.018182 | 495.6533126  |
| Fam175b     | 212835_at   | 0.0310072  | 107.3        | 32.72852202   | 130.0454545 | 34.60961506  |
| Fam175b     | 212837_at   | 0.0236696  | 283.5814815  | 88.40525148   | 322.2       | 63.89548013  |
| FAM179B     | 213304_at   | 0.00608161 | 448.4814815  | 150.2270744   | 599.6545455 | 181.3407756  |
| fam188a     | 218297_at   | 0.00307495 | 143.3851852  | 71.73237497   | 266.55      | 165.7024377  |
| fam18b      | 218446_s_at | 0.00300709 | 92.2037037   | 29.9468437    | 134.2363636 | 47.73171598  |
| FAM3A       | 38043_at    | 0.0242565  | 304.0407407  | 91.06270984   | 224.6909091 | 77.91446414  |
| FAM3C       | 201889_at   | 0.00811247 | 550.7        | 215.2742991   | 766.7136364 | 279.8984311  |
| FAM46C      | 220306_at   | 0.00973611 | 42.9037037   | 29.43795929   | 26.53181818 | 10.91994184  |
| Fam50a      | 203262_s_at | 0.0290633  | 516.937037   | 192.2779982   | 375.4318182 | 146.310467   |

| Gene symbol | Probeset    | P value    | Mean Control | STDEV Control | Mean Heroin | STDEV Heroin |
|-------------|-------------|------------|--------------|---------------|-------------|--------------|
| FAM65B      | 209829_at   | 0.00449419 | 213.6888889  | 89.00550257   | 327.4636364 | 100.3291181  |
| FAM8A1      | 203420_at   | 0.00130835 | 614.4481481  | 169.087816    | 814.1545455 | 181.1323056  |
| FARP1       | 201910_at   | 0.00386942 | 245.5111111  | 78.48165064   | 189.5318182 | 81.25057296  |
| farsa       | 202159_at   | 0.00663783 | 473.0296296  | 153.2609836   | 338.6636364 | 109.2166503  |
| FASTK       | 202676_x_at | 0.0141332  | 276.4111111  | 99.49436526   | 174.3909091 | 102.4436008  |
| FASTKD2     | 205976_at   | 0.0308079  | 40.79259259  | 16.76039117   | 50.74090909 | 23.15596517  |
| FBL         | 211623_s_at | 0.00421735 | 957.1777778  | 229.0671758   | 728.1090909 | 156.2867783  |
| Fbn1        | 202766_s_at | 0.0164261  | 97.78518519  | 34.75956652   | 132.8954545 | 49.07601953  |
| Fbxl15      | 218938_at   | 0.0133249  | 576.5259259  | 191.2382075   | 406.6409091 | 137.3611772  |
| Fbxl2       | 214436_at   | 0.00351436 | 411.9481481  | 63.27382112   | 492.6590909 | 89.42112065  |
| fbxo11      | 222119_s_at | 0.00497762 | 274.8925926  | 72.41651918   | 349.2090909 | 92.1459035   |
| Fbxo28      | 202271_at   | 0.0231605  | 423.037037   | 78.56870168   | 458.7227273 | 64.08307058  |
| Fbxo5       | 218875_s_at | 0.0302891  | 24.3037037   | 12.55282627   | 31.13181818 | 9.517672103  |
| Fbxw11      | 209455_at   | 0.00695191 | 755.1222222  | 225.1963064   | 895.6136364 | 242.1863023  |
| FBXW2       | 209630_s_at | 0.00990606 | 160.9185185  | 57.13036399   | 200.3181818 | 52.21734465  |
| FEN1        | 204768_s_at | 0.0169795  | 118.337037   | 23.95184509   | 98.43181818 | 26.88232534  |
| fgf12       | 214589_at   | 0.0328656  | 49.44074074  | 27.85341105   | 69.85       | 37.51113803  |
| FGF17       | 221376_at   | 0.0153604  | 44.83703704  | 24.24117838   | 59.82272727 | 26.8158967   |
| FGFR2       | 208225_at   | 0.00717526 | 7.025925926  | 5.788157179   | 4.990909091 | 2.400180368  |
| FIBP        | 202041_s_at | 0.00449846 | 931.0444444  | 267.2403101   | 701.6090909 | 172.6779549  |
| FIS1        | 218034_at   | 0.0268972  | 1848.159259  | 599.1713266   | 1393.795455 | 508.7450812  |
| fkbp4       | 200894_s_at | 0.0244804  | 166.737037   | 80.94186018   | 128.0954545 | 58.62696826  |
| FKBP5       | 204560_at   | 0.00891496 | 5.281481481  | 4.504018465   | 4.059090909 | 1.446394233  |
| FKBPL       | 219187_at   | 0.0176012  | 112.6222222  | 38.83927763   | 73.52272727 | 34.22818293  |
| FKTN        | 205283_at   | 0.0104667  | 183          | 47.35609781   | 228.6727273 | 54.35855548  |
| FLOT2       | 201350_at   | 0.0214147  | 648.4333333  | 160.0987412   | 564.6863636 | 136.847142   |
| FLRT2       | 204359_at   | 0.00228885 | 588.0222222  | 150.22941     | 885.8272727 | 316.4497044  |
| Flrt3       | 219250_s_at | 0.00186647 | 168.4481481  | 57.32339682   | 223.2045455 | 68.93246161  |
| FMR1        | 203689_s_at | 0.0209624  | 213.9481481  | 73.1284874    | 281.6272727 | 77.0622765   |
| FN3KRP      | 218210_at   | 0.0241293  | 501.4740741  | 92.97637662   | 440.6       | 88.11995072  |
| FNBP4       | 212232_at   | 0.0125505  | 187.6555556  | 66.97713923   | 256.4227273 | 77.19329438  |
| FNDC3A      | 202304_at   | 0.0198576  | 320.8888889  | 123.8847148   | 460.5818182 | 185.9926871  |
| FNDC3B      | 218618_s_at | 0.00399871 | 109.8296296  | 28.19960195   | 145.1863636 | 29.97764716  |
| FOLH1       | 217487_x_at | 0.0213181  | 191.0962963  | 81.4674474    | 134.8272727 | 60.54290239  |
| FOLR2       | 204829_s_at | 0.0159409  | 130.4814815  | 51.83868497   | 98.60454545 | 49.56821636  |
| foxg1       | 206018_at   | 0.00656791 | 1346.174074  | 329.7486591   | 1633.204545 | 338.2430212  |
| FOXP3       | 221333_at   | 0.0262893  | 15.08148148  | 12.43874335   | 10.60909091 | 7.716396216  |
| FPGS        | 202945_at   | 0.0293079  | 214.9333333  | 54.46833237   | 172.8636364 | 60.60735886  |
| Frmpd4      | 215052_at   | 0.0046885  | 135.7925926  | 57.24031612   | 177.5636364 | 58.09182834  |
| ftsj1       | 213937_s_at | 0.0323011  | 159.3074074  | 43.21742816   | 136.5954545 | 26.10089357  |

| Gene symbol | Probeset    | P value     | Mean Control | STDEV Control | Mean Heroin | STDEV Heroin |
|-------------|-------------|-------------|--------------|---------------|-------------|--------------|
| FUBP1       | 212847_at   | 0.00105625  | 123.2814815  | 42.33178509   | 174.8090909 | 41.91708265  |
| fus         | 200959_at   | 0.0052072   | 833.9666667  | 172.3392116   | 688.7       | 167.4928797  |
| FUT4        | 209893_s_at | 0.0119054   | 33.64814815  | 17.61907555   | 24.45909091 | 22.17782374  |
| FUT6        | 210398_x_at | 0.0212524   | 3.962962963  | 2.091953108   | 3.381818182 | 1.306626468  |
| fut9        | 207696_at   | 0.0177933   | 4.481481481  | 4.486821475   | 12.85909091 | 11.71298259  |
| fut9        | 214046_at   | 0.0041967   | 748.5518519  | 280.9466831   | 1062.927273 | 281.7116783  |
| FXYD5       | 218084_x_at | 0.00211653  | 258.1555556  | 73.62599005   | 222.6727273 | 77.44280336  |
| FZD7        | 203706_s_at | 0.00469514  | 123.6222222  | 34.40709155   | 180.5954545 | 84.2814247   |
| G6pc3       | 44654_at    | 0.0217418   | 611.2185185  | 158.5212823   | 517.2       | 141.1779492  |
| GAA         | 202812_at   | 0.0142527   | 347.7185185  | 83.41817288   | 288.7454545 | 69.1794542   |
| GABARAPL1   | 211457_at   | 0.00888353  | 43.75555556  | 27.90314751   | 62.18636364 | 39.36490213  |
| Gabbr2      | 209990_s_at | 0.00249864  | 310.1259259  | 80.50679184   | 391.3681818 | 86.03893021  |
| Gabra2      | 207014_at   | 0.000627091 | 680.8333333  | 323.0403964   | 1133.459091 | 512.4050023  |
| GABRA4      | 208463_at   | 0.021021    | 296.6259259  | 103.9962854   | 370.5318182 | 71.23807427  |
| GABRB1      | 207010_at   | 0.0176662   | 2574.340741  | 1196.623135   | 3518.677273 | 733.4017394  |
| Gad1        | 205278_at   | 0.00221925  | 2835.492593  | 613.5768511   | 3351.445455 | 1060.592985  |
| gal3st4     | 219815_at   | 0.0107936   | 196.0407407  | 51.96020118   | 164.4090909 | 83.10605908  |
| GALC        | 204417_at   | 0.0144828   | 376.4962963  | 90.2503334    | 443.3909091 | 80.00918941  |
| GALNT1      | 201724_s_at | 0.00334571  | 190.2333333  | 71.14336014   | 223.6818182 | 57.59117522  |
| GALNT10     | 207357_s_at | 0.0318228   | 70.37037037  | 44.81308887   | 49.7        | 24.03497452  |
| Galnt7      | 218313_s_at | 0.0091284   | 145.3222222  | 47.17330025   | 184.6318182 | 55.33908794  |
| GALR1       | 220821_at   | 0.0286052   | 12.93703704  | 14.15010596   | 7.386363636 | 8.044181302  |
| Gamt        | 205354_at   | 0.000159712 | 252.4407407  | 82.18527034   | 177.5772727 | 53.16704074  |
| Gas2        | 205848_at   | 0.0125069   | 50.72592593  | 21.52001917   | 65.99090909 | 23.2539379   |
| GATA3       | 209603_at   | 0.0308835   | 11.3037037   | 9.449724517   | 20.35       | 21.63026429  |
| GBA         | 210589_s_at | 0.00952336  | 429.1666667  | 186.0868201   | 256.7363636 | 127.5619608  |
| gcat        | 205164_at   | 0.00500687  | 122.1259259  | 71.07497446   | 54.10454545 | 34.40090637  |
| GCC2        | 202832_at   | 0.000124452 | 606.2888889  | 145.3026691   | 803.0454545 | 134.8680051  |
| gcdH        | 203500_at   | 0.00281397  | 249.8666667  | 59.55697337   | 196.5818182 | 83.01201081  |
| gcdH        | 208369_s_at | 0.00509274  | 238.9444444  | 56.53841671   | 198.7045455 | 50.99949092  |
| GCH1        | 204224_s_at | 0.00339458  | 132.4592593  | 45.7567251    | 188.6954545 | 53.48556082  |
| GDF1        | 206397_x_at | 0.0121789   | 3239.111111  | 1553.920841   | 2176.018182 | 1108.941723  |
| GDI1        | 201864_at   | 0.0093167   | 6545.237037  | 2005.216722   | 5135.540909 | 1889.992316  |
| GDI2        | 200009_at   | 0.0264151   | 1751.885185  | 494.5504833   | 1453.977273 | 309.9033243  |
| GFAP        | 203540_at   | 0.00349542  | 5976.17037   | 2636.191613   | 4014.195455 | 1862.719416  |
| GFM1        | 220903_at   | 0.00479821  | 16.54074074  | 11.6789508    | 29.38636364 | 17.38045688  |
| GFPT1       | 202722_s_at | 0.00794445  | 118.0481481  | 29.54499008   | 139.9863636 | 35.95165134  |
| Ggct        | 215380_s_at | 0.0206484   | 450.5814815  | 165.485219    | 507.9818182 | 140.6409702  |
| GGNBP2      | 218079_s_at | 0.0208108   | 548.5962963  | 170.0819994   | 682.8863636 | 151.7741659  |
| GGT5        | 205582_s_at | 0.0280582   | 67.52962963  | 37.70120193   | 45.19090909 | 26.32246748  |

| Gene symbol | Probeset    | P value     | Mean Control | STDEV Control | Mean Heroin | STDEV Heroin |
|-------------|-------------|-------------|--------------|---------------|-------------|--------------|
| GHR         | 205498_at   | 0.0127568   | 51.21111111  | 18.83442702   | 69.15454545 | 20.10952694  |
| GIMAP5      | 218805_at   | 0.00337524  | 200.8592593  | 69.03954975   | 152.7363636 | 43.0540142   |
| GIMAP5      | 64064_at    | 0.000501391 | 298.5074074  | 70.90142087   | 251.7772727 | 76.99774846  |
| GIMAP6      | 219777_at   | 0.0115532   | 58.88148148  | 26.20242263   | 41.69090909 | 23.2202069   |
| GIPC1       | 207525_s_at | 0.017336    | 555.1925926  | 136.6009768   | 453.0272727 | 151.0874587  |
| GIT1        | 218030_at   | 0.032881    | 417.2851852  | 165.2709493   | 340.7590909 | 131.7192673  |
| GIT2        | 209876_at   | 0.0028877   | 28.61481481  | 31.99599378   | 78.06818182 | 58.03008568  |
| GK3P        | 217167_x_at | 0.00840891  | 17.22222222  | 11.15607228   | 32.47727273 | 20.07737252  |
| Glb1        | 201576_s_at | 0.0138995   | 289.7666667  | 86.18179801   | 259.3727273 | 38.59746083  |
| GLB1L2      | 213713_s_at | 0.0139944   | 206.6111111  | 72.81805743   | 166.25      | 39.23415361  |
| GLRB        | 205280_at   | 0.0321947   | 339.7740741  | 120.5282112   | 421.1       | 163.6348636  |
| glrx3       | 207506_at   | 0.0104842   | 84.52222222  | 33.99842002   | 67.24090909 | 25.93650964  |
| GLS         | 203159_at   | 0.00265337  | 1492.885185  | 447.4839307   | 1842.818182 | 442.3200809  |
| GLS         | 203157_s_at | 0.0236182   | 260.6814815  | 130.0900192   | 355.55      | 139.4312862  |
| GLT8D2      | 221447_s_at | 0.0193948   | 107.7259259  | 31.13708638   | 123.2227273 | 24.5884009   |
| gm2a        | 35820_at    | 0.0260851   | 194.7        | 83.02576523   | 130.9136364 | 73.35386052  |
| gmfb        | 202544_at   | 0.00703704  | 1291.311111  | 287.2368954   | 1583.936364 | 365.9732836  |
| gmpr        | 204187_at   | 0.00416322  | 165.8888889  | 81.21433339   | 122.5       | 49.06162306  |
| GNAO1       | 204762_s_at | 0.0137807   | 1091.655556  | 295.5865204   | 1411.909091 | 501.2483596  |
| GOLGA6L5    | 213212_x_at | 0.0119061   | 97.46296296  | 34.50770425   | 135.8772727 | 50.22007692  |
| GOLGA8A     | 208798_x_at | 0.00211953  | 445.6111111  | 226.4980002   | 677.4454545 | 268.0214361  |
| GOSR2       | 210009_s_at | 0.0272651   | 91.8         | 45.32367356   | 61.56363636 | 31.42620298  |
| GPBR        | 222227_at   | 0.00526218  | 21.89259259  | 13.10824538   | 35.37727273 | 18.96791606  |
| GPHN        | 215578_at   | 0.01361     | 44.57407407  | 24.02613309   | 65.46818182 | 21.51790808  |
| Gpld1       | 215554_at   | 0.0119185   | 22.65185185  | 15.33320606   | 38.75       | 17.45562401  |
| GPR135      | 211659_at   | 0.0284498   | 12.98148148  | 9.654494252   | 9.540909091 | 5.21304765   |
| GPR161      | 206972_s_at | 0.0312942   | 11.76296296  | 13.21462326   | 22.25       | 19.75157016  |
| GPR161      | 214104_at   | 0.0278322   | 94.01481481  | 54.49361786   | 80.58181818 | 44.42373493  |
| GPR172A     | 222155_s_at | 0.0267674   | 56.05555556  | 34.85288128   | 35.14545455 | 32.19103287  |
| GPR32       | 221469_at   | 0.000210545 | 39.12962963  | 23.46960088   | 65.49090909 | 41.26623097  |
| GPR44       | 206361_at   | 0.00636689  | 131.0111111  | 44.78645342   | 96.93636364 | 24.51109652  |
| GPR88       | 220313_at   | 0.019194    | 2165.559259  | 1161.468295   | 2746.504545 | 1172.884193  |
| GPRASP1     | 204793_at   | 0.00206305  | 1427.088889  | 342.7734252   | 1703.663636 | 343.5487677  |
| Gprc5a      | 203108_at   | 0.027323    | 10.1037037   | 3.775577539   | 13.45       | 7.508772647  |
| GPS1        | 217782_s_at | 0.00326112  | 304.262963   | 101.6761834   | 238.9045455 | 56.74334429  |
| GPX1        | 200736_s_at | 0.000737143 | 1135.981481  | 440.7706678   | 785.8590909 | 258.6469641  |
| GPX4        | 201106_at   | 0.014395    | 3233.688889  | 1194.703523   | 2623.027273 | 718.1097729  |
| Grb14       | 206204_at   | 0.0316425   | 38.01111111  | 20.14895174   | 32.85       | 15.62070512  |
| grem2       | 220794_at   | 0.0269003   | 150.237037   | 53.08230292   | 177.6090909 | 49.80238959  |
| GRIA1       | 209793_at   | 0.0159211   | 475.462963   | 121.8759494   | 568.4681818 | 171.8538454  |

| Gene symbol | Probeset    | P value     | Mean Control | STDEV Control | Mean Heroin | STDEV Heroin |
|-------------|-------------|-------------|--------------|---------------|-------------|--------------|
| GRIA2       | 205358_at   | 0.000990271 | 2855.959259  | 1135.297169   | 4014.290909 | 1071.269333  |
| GRM3        | 205814_at   | 0.0129243   | 1286.711111  | 429.3276222   | 1487.495455 | 371.292428   |
| Grm5        | 214217_at   | 0.000219711 | 418.5740741  | 146.6915959   | 670.9727273 | 246.8708071  |
| grn         | 211284_s_at | 0.0119632   | 152.1851852  | 40.56364139   | 112.2272727 | 46.6151537   |
| GRPEL1      | 212432_at   | 0.0160403   | 231.662963   | 59.31869694   | 187.4863636 | 61.25002076  |
| Grsf1       | 221917_s_at | 0.0310719   | 89.62962963  | 20.50628074   | 106.0363636 | 31.83067621  |
| GSDMB       | 219233_s_at | 0.0281452   | 76.78148148  | 58.65218887   | 113.9590909 | 46.10685993  |
| GSTM5       | 205752_s_at | 0.0131218   | 513.8148148  | 250.251968    | 423.5636364 | 172.9668687  |
| GSTO1       | 201470_at   | 0.00897318  | 3017.677778  | 849.0169679   | 2229.081818 | 560.5820272  |
| GSTP1       | 200824_at   | 0.0163644   | 675.3592593  | 157.4980446   | 579.0545455 | 145.4657339  |
| GTF2F1      | 202355_s_at | 0.0297691   | 347.1592593  | 64.95807085   | 273.8454545 | 88.94638689  |
| gtf2h2      | 215470_at   | 0.00626298  | 40.84074074  | 26.72842421   | 54.86363636 | 21.29013958  |
| GTF3C1      | 202320_at   | 0.0204332   | 537.8407407  | 151.2685265   | 461.4681818 | 103.9080609  |
| GTPBP1      | 205274_at   | 0.0315531   | 17.05925926  | 9.154496972   | 14.27272727 | 7.72264338   |
| GUK1        | 200075_s_at | 0.0191364   | 1651.57037   | 465.3758364   | 1406.318182 | 387.2253468  |
| GYG1        | 211275_s_at | 0.00354765  | 1038.9       | 242.6478582   | 805.4045455 | 142.5499694  |
| GYPB        | 216833_x_at | 0.0028565   | 91.04074074  | 35.46016464   | 77.80909091 | 24.88380443  |
| GYPB        | 216398_at   | 0.0270289   | 127.9888889  | 39.04628746   | 171.1636364 | 83.09550183  |
| H2afx       | 205436_s_at | 0.0248925   | 690.0074074  | 147.8270245   | 593.6954545 | 116.3641758  |
| H2AFY       | 220375_s_at | 0.0183627   | 180.4        | 58.97047501   | 202.5681818 | 69.11108647  |
| h3f3a       | 209069_s_at | 0.02523     | 1815.8       | 597.2497757   | 1566.236364 | 467.0539456  |
| H3f3b       | 211997_x_at | 0.0186929   | 3480.848148  | 1220.016587   | 2975.840909 | 808.8116066  |
| HADHA       | 208630_at   | 0.00605163  | 431.3259259  | 93.21266253   | 342.5636364 | 99.46269722  |
| hbd         | 206834_at   | 0.0283952   | 98.26666667  | 60.99435661   | 82.55       | 41.46670207  |
| HBG1        | 204848_x_at | 0.0197624   | 75.47037037  | 100.1155518   | 56.70909091 | 83.44184122  |
| HDAC5       | 202455_at   | 0.00291869  | 363.9814815  | 84.16721926   | 301.0045455 | 62.87764746  |
| HDGFRP3     | 209524_at   | 0.00333559  | 473.2259259  | 94.10016591   | 619.6863636 | 170.7648182  |
| HDGFRP3     | 209526_s_at | 0.0100144   | 267.937037   | 108.512506    | 404.7818182 | 200.9089219  |
| HEATR6      | 65493_at    | 0.0220293   | 139.9481481  | 45.17081572   | 115.3863636 | 24.34643409  |
| helz        | 203674_at   | 0.0275552   | 278.6296296  | 72.5336835    | 337.65      | 76.56288265  |
| hemK1       | 218620_s_at | 0.00778203  | 46.41851852  | 36.08610469   | 17.84545455 | 16.3471485   |
| HERC1       | 218306_s_at | 0.00361079  | 489.7666667  | 125.8405034   | 615.7       | 171.7740515  |
| HERC2       | 217902_s_at | 0.00244171  | 371.3185185  | 85.86702616   | 436.4727273 | 86.29856911  |
| HERPUD1     | 217168_s_at | 0.0189813   | 669.6666667  | 214.1755732   | 539.1727273 | 146.8349517  |
| hes1        | 203394_s_at | 0.0259964   | 84.9962963   | 21.64971987   | 123.0727273 | 58.23111737  |
| hexA        | 201765_s_at | 0.00500222  | 339.0148148  | 105.4169951   | 237.1227273 | 97.91658711  |
| HFE         | 211863_x_at | 0.011744    | 119.7333333  | 34.87866882   | 97.53181818 | 41.57750521  |
| HFE         | 206086_x_at | 0.0277876   | 107.8444444  | 41.04264511   | 95.42727273 | 45.34461885  |
| hgd         | 214307_at   | 0.00273177  | 29.35925926  | 16.35364601   | 49.53181818 | 27.93547644  |
| HIRIP3      | 204504_s_at | 0.0203012   | 242.037037   | 67.16510168   | 184.4045455 | 65.60035915  |

| Gene symbol | Probeset    | P value     | Mean Control | STDEV Control | Mean Heroin | STDEV Heroin |
|-------------|-------------|-------------|--------------|---------------|-------------|--------------|
| HIST2H2AA3  | 214290_s_at | 0.0184996   | 232.1296296  | 74.36182755   | 179.8363636 | 66.21718627  |
| hivep2      | 212641_at   | 0.0287601   | 324.4703704  | 130.8503544   | 376.0590909 | 122.8481395  |
| HLA-A       | 213932_x_at | 0.00326315  | 3722.62963   | 1044.313932   | 2909.404545 | 961.9141321  |
| HLA-B       | 209140_x_at | 0.00570526  | 1818.503704  | 789.7906064   | 1344.236364 | 412.2331801  |
| HLA-B       | 216526_x_at | 0.00187327  | 2597.985185  | 883.7499123   | 1909.459091 | 629.9224666  |
| HLA-B       | 208729_x_at | 0.0282133   | 585.0555556  | 328.4003108   | 456.1636364 | 144.6752901  |
| hla-drb1    | 204670_x_at | 0.0251224   | 549.8148148  | 234.4456386   | 459.5818182 | 155.455811   |
| HLA-DRB3    | 221491_x_at | 0.0224369   | 47.52962963  | 18.7035335    | 55.50909091 | 21.95111255  |
| HLA-DRB4    | 208306_x_at | 0.0101052   | 527.5259259  | 292.5040468   | 389.6636364 | 128.0666216  |
| HLA-DRB4    | 209312_x_at | 0.0102727   | 497.6592593  | 232.9229408   | 367.4590909 | 108.31935    |
| HLA-DRB6    | 217362_x_at | 0.0223799   | 204.5666667  | 54.10280812   | 180.9727273 | 86.00671171  |
| HLA-E       | 200904_at   | 0.000590518 | 303.7666667  | 84.25516191   | 220.5409091 | 86.06249479  |
| HLA-G       | 211528_x_at | 0.0048467   | 966.6518519  | 248.3447238   | 845.5727273 | 230.9652482  |
| HLA-G       | 211530_x_at | 0.00923944  | 230.3        | 122.532203    | 181.1727273 | 77.81568689  |
| HLF         | 204753_s_at | 0.0118303   | 348.4296296  | 86.32828583   | 421.7363636 | 82.46024465  |
| HLF         | 204754_at   | 0.00319617  | 352.2333333  | 71.38232921   | 407.2227273 | 80.2555735   |
| hlf         | 202983_at   | 0.00948244  | 356.0518519  | 116.0353009   | 470.8545455 | 110.3889346  |
| HMGB1       | 216508_x_at | 0.0203591   | 550.6518519  | 300.7983446   | 409.0636364 | 126.7695417  |
| HMGB3       | 203744_at   | 0.0220023   | 336.9148148  | 86.7688162    | 386.0363636 | 57.77630545  |
| hmgcl       | 202772_at   | 0.0171085   | 396.862963   | 78.75628008   | 330.7818182 | 94.02389583  |
| HMGCR       | 202540_s_at | 0.0263613   | 430.9814815  | 133.310436    | 487.8727273 | 161.8147565  |
| HMGN1       | 200944_s_at | 0.0191426   | 724.2962963  | 269.8003243   | 906.9       | 320.130042   |
| HMGN2       | 208668_x_at | 0.0194      | 2889.748148  | 876.872624    | 2505.531818 | 569.8210834  |
| HMGN5       | 221238_at   | 0.00847221  | 60.22592593  | 22.25515658   | 93.06363636 | 51.36538157  |
| HMGN5       | 221606_s_at | 0.0119107   | 41.41851852  | 20.00282744   | 58.05454545 | 19.57719099  |
| Hmox2       | 218120_s_at | 0.0304017   | 583.4444444  | 221.6052629   | 466.2090909 | 161.3320117  |
| HNRNPA1     | 221919_at   | 0.0132352   | 77.21481481  | 37.91471912   | 113.9136364 | 40.77967859  |
| Hnrnpa3     | 211929_at   | 0.00388334  | 881.6814815  | 318.0300482   | 1159.963636 | 427.7194269  |
| HNRNPD      | 213359_at   | 0.00658296  | 66.98518519  | 41.88843886   | 116.8181818 | 59.83028884  |
| HNRPDL      | 212454_x_at | 0.00477907  | 812.4851852  | 297.9686918   | 1073.963636 | 255.8071512  |
| HOMER1      | 213793_s_at | 0.0210738   | 732.0481481  | 313.7184681   | 855.1818182 | 194.5966124  |
| HOMER3      | 204647_at   | 0.0133867   | 226.4444444  | 111.27818     | 162.6       | 57.51185385  |
| HPRT1       | 202854_at   | 0.0121996   | 884.9296296  | 331.2695647   | 1116.663636 | 390.2054752  |
| HS1BP3      | 219020_at   | 0.00647765  | 263.0407407  | 51.95669987   | 218.1045455 | 45.41150974  |
| Hs2st1      | 203284_s_at | 0.00751992  | 314.6111111  | 75.48174172   | 395.3409091 | 82.97309753  |
| Hs2st1      | 203285_s_at | 0.0023462   | 182.4925926  | 50.08398275   | 231.6181818 | 55.08006844  |
| HSD17B10    | 202282_at   | 0.000997461 | 665.8        | 167.6867111   | 507.3181818 | 140.5874161  |
| HSD17B8     | 213540_at   | 0.0197403   | 258.7444444  | 68.40329127   | 206.5681818 | 39.63737277  |
| hsf1        | 202344_at   | 0.000117778 | 151.0777778  | 45.16132053   | 104.4454545 | 41.49986491  |
| hsf2        | 211220_s_at | 0.0135346   | 22.9037037   | 12.2883147    | 31.2        | 13.46052429  |

| Gene symbol | Probeset    | P value    | Mean Control | STDEV Control | Mean Heroin | STDEV Heroin |
|-------------|-------------|------------|--------------|---------------|-------------|--------------|
| HSPA4       | 208814_at   | 0.0165234  | 266.662963   | 85.55640581   | 363.1590909 | 133.7098374  |
| HSPA4       | 211015_s_at | 0.00442018 | 82.73333333  | 28.66082827   | 64.23181818 | 27.00046536  |
| hspc159     | 219998_at   | 0.0205364  | 82.3037037   | 62.43708514   | 56.99545455 | 38.85621207  |
| htatsf1     | 202602_s_at | 0.0145384  | 479.362963   | 164.7065576   | 571.5272727 | 181.9072505  |
| HTR1D       | 207368_at   | 0.0317143  | 28.61111111  | 24.57799725   | 20.36363636 | 14.35915323  |
| HUS1        | 204884_s_at | 0.0167035  | 22.52592593  | 12.01750622   | 32.60454545 | 23.21570645  |
| HYAL2       | 206855_s_at | 0.0274001  | 167.9444444  | 53.36484246   | 149.7318182 | 32.75416929  |
| icmt        | 201611_s_at | 0.00313976 | 306.0296296  | 90.68471933   | 386.35      | 81.55472454  |
| ICOSLG      | 213450_s_at | 0.0271457  | 151.262963   | 58.71829192   | 109.3727273 | 50.76023173  |
| IDI1        | 208881_x_at | 0.0263114  | 604.7555556  | 215.79624     | 696.5772727 | 283.222924   |
| ids         | 202439_s_at | 0.028722   | 656.9888889  | 287.2501059   | 950.6772727 | 329.3883176  |
| ldua        | 205059_s_at | 0.0249751  | 120.4074074  | 49.38202667   | 149.0681818 | 51.9758679   |
| lfitm1      | 201601_x_at | 0.00875867 | 412.7555556  | 165.089473    | 326.1727273 | 89.77636332  |
| lfitm3      | 212203_x_at | 0.0103614  | 1159.085185  | 559.7684815   | 865.6272727 | 365.264309   |
| IFT74       | 61732_r_at  | 0.0332683  | 11.82962963  | 7.672318615   | 14.97272727 | 8.296366492  |
| IGBP1       | 202105_at   | 0.00368875 | 537.4296296  | 97.96637105   | 459.3545455 | 91.18195168  |
| Igf2r       | 201393_s_at | 0.0291158  | 99.14074074  | 40.37580444   | 122.85      | 39.38558777  |
| IGFBP5      | 211958_at   | 0.0233038  | 110.8148148  | 26.45625858   | 93.98181818 | 27.74002843  |
| IGFBP6      | 203851_at   | 0.00101843 | 387.5259259  | 101.6680254   | 301.9318182 | 75.04867237  |
| IGHM        | 217035_at   | 0.00437539 | 94.92962963  | 72.21507841   | 55.51363636 | 40.59999174  |
| Igkc        | 221671_x_at | 0.00619612 | 31.48888889  | 11.03791833   | 26.61363636 | 8.902770861  |
| IGLJ3       | 211881_x_at | 0.0271333  | 47.9         | 23.38924802   | 41.32272727 | 24.00698176  |
| igsf3       | 202421_at   | 0.00795947 | 316.0185185  | 79.8389631    | 381.3954545 | 74.83960294  |
| IHH         | 215420_at   | 0.0210619  | 57.48518519  | 29.18583302   | 48.28636364 | 38.13731201  |
| IL13RA1     | 211612_s_at | 0.0257462  | 76.0962963   | 21.1014123    | 67.86818182 | 30.31011754  |
| IL16        | 209827_s_at | 0.0298089  | 148.9        | 35.70380286   | 137.1227273 | 66.46210472  |
| IL4         | 207538_at   | 0.007542   | 24.46296296  | 18.81442058   | 18.22272727 | 17.91264336  |
| IL4         | 207539_s_at | 0.00682171 | 12.43333333  | 11.86235156   | 5.313636364 | 4.982378038  |
| ILVBL       | 210624_s_at | 0.0189969  | 592.6703704  | 102.6506915   | 484.9590909 | 148.74491    |
| ILVBL       | 216270_at   | 0.0177559  | 7.459259259  | 4.386715896   | 5.722727273 | 2.042624786  |
| IMMP2L      | 216564_at   | 0.00304948 | 35.27037037  | 26.5023049    | 20.25909091 | 12.10181644  |
| IMP4        | 212411_at   | 0.0261526  | 594.4518519  | 130.9656601   | 482.7045455 | 128.5527073  |
| impact      | 218637_at   | 0.0171807  | 126.8259259  | 43.69067488   | 167.8045455 | 53.01031775  |
| INADL       | 214705_at   | 0.0184184  | 8.274074074  | 9.129099399   | 17.04545455 | 12.34730459  |
| INPP4A      | 204553_x_at | 0.0109584  | 77.27037037  | 49.025204     | 118.3954545 | 47.83795542  |
| INPP4A      | 208363_s_at | 0.00648973 | 93.69259259  | 37.24080605   | 140.9909091 | 58.04279135  |
| INPP4A      | 204552_at   | 0.0271398  | 296.7666667  | 128.9235522   | 387.75      | 167.2932747  |
| Insig2      | 209566_at   | 0.0040675  | 105.8074074  | 40.20373046   | 141.8227273 | 43.68887765  |
| INS-IGF2    | 202409_at   | 0.0174263  | 139.3296296  | 45.80039314   | 165.3136364 | 53.49340231  |
| INS-IGF2    | 210881_s_at | 0.013571   | 9.47037037   | 3.061524861   | 12.75909091 | 6.184285699  |



| Gene symbol | Probeset    | P value     | Mean Control | STDEV Control | Mean Heroin | STDEV Heroin |
|-------------|-------------|-------------|--------------|---------------|-------------|--------------|
| INTS1       | 212212_s_at | 0.0150001   | 363.7222222  | 154.6810921   | 257.6363636 | 98.67386659  |
| IP6K1       | 212439_at   | 0.0189474   | 712.0888889  | 212.7121825   | 592.8636364 | 108.0247659  |
| IPO5        | 211954_s_at | 0.0230818   | 388.7777778  | 67.5859358    | 324.8681818 | 68.33085747  |
| IPO7        | 200994_at   | 0.000282877 | 429.3185185  | 91.52573844   | 615.1545455 | 168.1292069  |
| IPO7        | 200995_at   | 0.00803399  | 342.137037   | 70.71272407   | 411.2227273 | 95.11991395  |
| Ipo9        | 213785_at   | 0.00302291  | 163.6        | 76.26741415   | 209.9090909 | 59.07348055  |
| IQCB1       | 211707_s_at | 0.015329    | 119.6333333  | 32.65982006   | 153.5863636 | 44.96565139  |
| Iqcg        | 221185_s_at | 0.0291493   | 106.5        | 26.23108843   | 128.9136364 | 37.25709003  |
| IRF8        | 204057_at   | 0.0015438   | 130.037037   | 54.96593454   | 85.95909091 | 61.24000139  |
| irs2        | 209185_s_at | 0.00240925  | 1262.277778  | 335.4141875   | 1622.159091 | 435.9666159  |
| ISOC1       | 218170_at   | 0.0159498   | 233.8222222  | 67.66758873   | 297.2363636 | 74.36035519  |
| isoc2       | 218893_at   | 0.0327719   | 293.9703704  | 81.53457886   | 231.0909091 | 74.2787729   |
| ITGA3       | 201474_s_at | 0.0235581   | 99.72222222  | 35.38328955   | 70.34090909 | 36.63101287  |
| Ilgav       | 202351_at   | 0.0240002   | 868.062963   | 251.4527974   | 1081.95     | 314.0590311  |
| ITGB1BP2    | 219829_at   | 0.0286135   | 8.67037037   | 3.536275182   | 13.03636364 | 8.614580412  |
| ITGB2       | 202803_s_at | 0.0328581   | 173.237037   | 66.34696763   | 143.6       | 35.00391815  |
| itih5       | 219064_at   | 0.0144518   | 261.1296296  | 72.89229048   | 197.1681818 | 58.62772289  |
| Itpkb       | 203723_at   | 0.0260256   | 673.8074074  | 321.7699978   | 549.2090909 | 225.2387832  |
| ITPR1       | 203710_at   | 0.012853    | 910.5777778  | 326.6960118   | 1091.35     | 357.077969   |
| ITSN1       | 209297_at   | 0.0186173   | 159.8259259  | 94.17645301   | 241.3772727 | 106.3338047  |
| IVNS1ABP    | 201362_at   | 0.0301801   | 476.9333333  | 222.656448    | 509.6727273 | 215.6995004  |
| Jak2        | 205842_s_at | 0.0224333   | 77.37777778  | 24.25146044   | 100.5772727 | 31.97801226  |
| JMJD1C      | 221763_at   | 0.0088146   | 124.9148148  | 52.92389822   | 200.8181818 | 95.26455712  |
| KAL1        | 205206_at   | 0.0179746   | 507.9851852  | 179.0595533   | 858.4590909 | 485.8238704  |
| kat5        | 214258_x_at | 0.0277607   | 559.8851852  | 184.5461245   | 464.1681818 | 155.9860323  |
| KCNB1       | 211006_s_at | 0.0142768   | 405.9703704  | 129.4818277   | 505.7090909 | 132.2100598  |
| KCND2       | 207103_at   | 0.00883437  | 252.4222222  | 80.94383776   | 312.05      | 115.4295776  |
| Kcnd3       | 213832_at   | 0.00284012  | 534.7222222  | 183.9606215   | 749.9772727 | 204.9635599  |
| KCNE1L      | 220010_at   | 0.0122423   | 96.29259259  | 46.30122881   | 57.09090909 | 37.89560735  |
| KCNJ15      | 211806_s_at | 0.0256682   | 177.2        | 55.53763797   | 166.3181818 | 73.52385189  |
| KCNK1       | 204678_s_at | 0.0207278   | 320.4185185  | 84.83515707   | 366.7772727 | 132.51719    |
| KCNQ1       | 204486_at   | 0.0306919   | 7.351851852  | 4.73346274    | 12.74090909 | 13.00365     |
| kctd12      | 212192_at   | 0.0094585   | 815.7666667  | 282.3498852   | 1112.895455 | 292.6525446  |
| Khdrbs1     | 201488_x_at | 0.0150436   | 586.7518519  | 96.90777285   | 700.3863636 | 173.0497074  |
| Khk         | 211028_s_at | 0.00379706  | 186.8259259  | 79.57809223   | 114.9727273 | 39.5974047   |
| kiaa0174    | 200851_s_at | 0.00387288  | 944.9851852  | 123.3952988   | 773.7636364 | 179.3613181  |
| kiaa0415    | 209913_x_at | 0.0292205   | 96.42962963  | 38.97766436   | 81.16363636 | 33.04378834  |
| KIAA0427    | 204303_s_at | 0.0303099   | 378.7222222  | 136.0939673   | 299.1318182 | 112.6080704  |
| KIAA0564    | 214231_s_at | 0.00558786  | 28.74814815  | 15.8142431    | 37.50454545 | 11.8404262   |
| KIAA0564    | 212946_at   | 0.0230498   | 244.6925926  | 51.78072054   | 345.5409091 | 149.3799172  |

| Gene symbol | Probeset    | P value     | Mean Control | STDEV Control | Mean Heroin | STDEV Heroin |
|-------------|-------------|-------------|--------------|---------------|-------------|--------------|
| KIAA0652    | 203364_s_at | 0.0256416   | 525.6851852  | 133.6594458   | 452.9363636 | 71.8557586   |
| KIAA0753    | 204711_at   | 0.0186358   | 252.6888889  | 93.02255861   | 319.4909091 | 61.46632767  |
| KIAA0754    | 215268_at   | 0.00992789  | 30.84814815  | 26.23654777   | 53.62272727 | 26.04942065  |
| KIAA0776    | 212633_at   | 0.0311625   | 207.3814815  | 54.40250303   | 268.6090909 | 82.94421481  |
| kiaa0907    | 202220_at   | 0.00855608  | 446.2222222  | 91.64666821   | 550.5227273 | 96.34439184  |
| KIAA0913    | 214867_at   | 0.00490353  | 46.34444444  | 20.57714067   | 81.76363636 | 40.75269837  |
| KIAA0947    | 209654_at   | 0.0108901   | 336.2296296  | 85.7139869    | 392.6727273 | 78.57015174  |
| KIAA1012    | 207305_s_at | 0.00365688  | 734.0037037  | 133.7040316   | 900.5909091 | 205.4951996  |
| KIAA1109    | 212779_at   | 0.0325398   | 483.5740741  | 132.566963    | 611.9272727 | 192.560299   |
| KIAA1467    | 213234_at   | 0.0129327   | 514.162963   | 104.4933827   | 592.8727273 | 126.5726036  |
| KIDINS220   | 212163_at   | 0.00101599  | 622.2111111  | 225.3427327   | 832.0227273 | 197.3869657  |
| KIF16B      | 219570_at   | 0.00322179  | 71.7962963   | 22.6637033    | 90.31818182 | 20.06483862  |
| KIF25       | 207682_s_at | 0.0167171   | 12.9         | 11.44700162   | 20.95       | 14.42497008  |
| Kif3a       | 213623_at   | 0.0260322   | 272.8777778  | 121.0776907   | 378.5181818 | 175.5841642  |
| KIF5C       | 203129_s_at | 0.0119589   | 812.4740741  | 286.4850481   | 962.9772727 | 225.2714678  |
| KIF5C       | 203130_s_at | 0.00158561  | 3611.025926  | 1495.561571   | 4342.5      | 1217.712756  |
| KIT         | 205051_s_at | 0.00331124  | 264.5407407  | 107.8333624   | 371.7954545 | 131.059156   |
| kif8        | 219930_at   | 0.0257631   | 17.7962963   | 15.19090015   | 11.68181818 | 6.628555568  |
| KLHL3       | 221221_s_at | 0.0093163   | 513.2481481  | 171.0079943   | 579.4181818 | 115.0681439  |
| Klh35       | 214208_at   | 0.0109369   | 14.97407407  | 6.991015806   | 24.38636364 | 18.68837926  |
| KLRD1       | 207795_s_at | 0.00796495  | 24.4037037   | 14.38921823   | 37.26818182 | 25.23203531  |
| kpna3       | 221502_at   | 0.000634535 | 624.862963   | 126.4675731   | 833.1454545 | 197.8440818  |
| Kras        | 204009_s_at | 3.55599E-05 | 556.6037037  | 159.5958923   | 755.5181818 | 162.5478146  |
| Kras        | 214352_s_at | 0.00249354  | 901.5259259  | 299.0080737   | 1169.55     | 287.9096663  |
| KRR1        | 203202_at   | 0.0267319   | 248.8481481  | 142.2642838   | 302.6363636 | 94.64657338  |
| krt24       | 220267_at   | 0.0333049   | 40.65925926  | 16.26871134   | 37          | 24.10249938  |
| lamb2       | 216264_s_at | 0.0194587   | 211.5851852  | 49.87521123   | 169.3954545 | 45.51457618  |
| LAMC3       | 219407_s_at | 0.0305093   | 104.5851852  | 35.57520424   | 81.15454545 | 51.91058913  |
| lamp1       | 201553_s_at | 0.0324092   | 5897.374074  | 2892.819965   | 4138.259091 | 1621.14995   |
| LAPTM5      | 201721_s_at | 0.0119984   | 738.9        | 454.2946172   | 490.8954545 | 194.4140047  |
| LASS4       | 218922_s_at | 0.00673474  | 116.4814815  | 63.51044152   | 62.65       | 49.24801906  |
| LASS6       | 212442_s_at | 0.0110142   | 576.2444444  | 164.9074667   | 644.4090909 | 152.7681028  |
| LAT2        | 221581_s_at | 0.00682436  | 78.42592593  | 40.87693155   | 47.75454545 | 26.67113166  |
| Lbx1        | 208380_at   | 0.0197061   | 3.422222222  | 2.135115442   | 2.95        | 1.865667249  |
| Ldlr        | 202067_s_at | 0.0259326   | 7.703703704  | 2.583748243   | 9.936363636 | 5.393695213  |
| LEMD3       | 218604_at   | 0.0122762   | 397.6481481  | 85.90959636   | 504.4181818 | 148.364996   |
| LEPROTL1    | 202594_at   | 0.00481491  | 747.7518519  | 126.0911708   | 869.1136364 | 184.846068   |
| LGALS1      | 201105_at   | 0.00545535  | 1245.3       | 606.7922341   | 891.8181818 | 633.7377132  |
| Igi1        | 206349_at   | 0.00254855  | 840.6666667  | 275.9293945   | 1108.018182 | 263.4899486  |
| Lhb         | 214471_x_at | 0.0243642   | 179.0888889  | 103.2794206   | 220.4409091 | 76.51139759  |

| Gene symbol  | Probeset    | P value     | Mean Control | STDEV Control | Mean Heroin | STDEV Heroin |
|--------------|-------------|-------------|--------------|---------------|-------------|--------------|
| LILRA1       | 207872_s_at | 0.0198435   | 37.16666667  | 24.52577922   | 28.05909091 | 22.08077507  |
| LIN37        | 213526_s_at | 0.00466969  | 217.1703704  | 55.04317057   | 172.0545455 | 43.43845923  |
| Lin7b        | 219760_at   | 0.0173073   | 600.237037   | 172.1562509   | 448.3136364 | 165.3201895  |
| LIPF         | 206334_at   | 0.0318756   | 26.83703704  | 23.07087988   | 20.51818182 | 14.83745699  |
| Llgl1        | 206123_at   | 0.0207515   | 60.76296296  | 35.80676932   | 39.74545455 | 26.62082477  |
| Lman2        | 200805_at   | 0.00542854  | 241.1185185  | 56.4262012    | 189.2       | 38.46610134  |
| LMF1         | 46142_at    | 0.0155256   | 219.7777778  | 70.39680573   | 165.0363636 | 59.26300979  |
| Imf2         | 31837_at    | 0.0285315   | 328.4888889  | 70.19405702   | 274.9318182 | 92.42185572  |
| Imna         | 212086_x_at | 0.00784913  | 248.0074074  | 84.59792653   | 214.2454545 | 81.71499092  |
| LMNB1        | 203276_at   | 0.0268559   | 33.39259259  | 22.58832111   | 49.64545455 | 25.73168747  |
| LMO3         | 204424_s_at | 0.0162162   | 5190.7       | 1711.256288   | 5741.604545 | 1479.981905  |
| Lmo4         | 209205_s_at | 0.00911317  | 515.5703704  | 190.2001311   | 648.2863636 | 234.8628116  |
| LOC100127998 | 220405_at   | 0.0278293   | 219.8148148  | 96.8028079    | 276.7318182 | 78.45233546  |
| LOC100128836 | 213356_x_at | 0.0118404   | 6488.388889  | 1530.254556   | 6877.804545 | 1623.819648  |
| LOC100130401 | 220612_at   | 0.026202    | 92.2         | 29.04390576   | 120.6681818 | 44.24915804  |
| LOC220594    | 213510_x_at | 0.00229422  | 434.6037037  | 121.4545768   | 626.7363636 | 205.9434054  |
| LOC257152    | 215302_at   | 0.0133518   | 53.4962963   | 28.88997007   | 50.56363636 | 22.08474038  |
| LOC284244    | 214162_at   | 0.00531684  | 24.55185185  | 18.356038     | 38.23181818 | 22.73963157  |
| LOC441347    | 214949_at   | 0.00350549  | 178.5481481  | 59.0990913    | 250.7818182 | 96.23411254  |
| LOC442497    | 200924_s_at | 0.000546145 | 354.7185185  | 103.3078485   | 286.2954545 | 75.48125265  |
| lonp1        | 209017_s_at | 0.0103724   | 618.7333333  | 159.4331859   | 477.1136364 | 188.8097109  |
| LONP2        | 221834_at   | 0.0225909   | 270.7888889  | 118.7326581   | 366.2772727 | 148.287205   |
| Lpcat3       | 202793_at   | 0.000480101 | 31.32592593  | 15.41075031   | 18.37272727 | 8.345468221  |
| LPHN2        | 206953_s_at | 0.000531591 | 132.8592593  | 32.08038293   | 189.4136364 | 47.41348307  |
| Lpl          | 203548_s_at | 0.0286321   | 872.4111111  | 366.5692603   | 1218.795455 | 707.1670763  |
| Lpl          | 203549_s_at | 0.0250384   | 2044.051852  | 1166.239717   | 2510.586364 | 1028.302077  |
| Lppr1        | 219732_at   | 0.000628431 | 884.8444444  | 208.5927894   | 1182.136364 | 336.7307933  |
| LRCH4        | 90610_at    | 0.0151351   | 277.8111111  | 102.1092376   | 230.25      | 76.84822859  |
| LRP12        | 220253_s_at | 0.0237214   | 59.07777778  | 25.10034222   | 105.2863636 | 76.16299749  |
| LRP6         | 205606_at   | 0.0091809   | 102.0074074  | 67.22042344   | 183.4590909 | 95.39456238  |
| LRP8         | 205282_at   | 0.0130056   | 106.4703704  | 25.80531869   | 140.6818182 | 39.69831034  |
| lrpprc       | 211615_s_at | 0.00769137  | 608.1666667  | 128.3467629   | 688.2772727 | 199.7121284  |
| LRRC49       | 219338_s_at | 0.0322348   | 369.1111111  | 152.9664175   | 420.1363636 | 110.8188679  |
| LRRC8B       | 212978_at   | 0.00445457  | 271.7740741  | 57.28818909   | 317.6272727 | 66.43715385  |
| LRRC8B       | 212976_at   | 0.0199415   | 176.3185185  | 72.85890494   | 204.1272727 | 76.61589529  |
| LRRN2        | 216164_at   | 0.0153405   | 178.9592593  | 39.32460826   | 152.1       | 69.36843663  |
| lrm3         | 209840_s_at | 0.00413842  | 600.762963   | 177.4070204   | 772.9681818 | 162.8376942  |
| lrm3         | 209841_s_at | 0.0101944   | 994.5814815  | 260.5337289   | 1274.986364 | 275.5670367  |
| Lrrtm2       | 206408_at   | 0.00010373  | 836.1185185  | 345.4680694   | 1215.345455 | 331.1292033  |
| LRRTM4       | 220345_at   | 0.00783258  | 89.15925926  | 27.99362921   | 123.1818182 | 36.62232778  |

| Gene symbol | Probeset    | P value     | Mean Control | STDEV Control | Mean Heroin | STDEV Heroin |
|-------------|-------------|-------------|--------------|---------------|-------------|--------------|
| Ism14a      | 222099_s_at | 0.0149876   | 401.9740741  | 101.4200579   | 444.3727273 | 66.69545699  |
| LSM2        | 209449_at   | 0.00187465  | 208.5037037  | 69.18854108   | 177.9318182 | 42.69165622  |
| LSM4        | 202736_s_at | 0.0141128   | 449.6333333  | 221.5750281   | 346.8590909 | 139.8615494  |
| LSM4        | 202737_s_at | 0.00306566  | 946.0259259  | 241.6065088   | 727.9090909 | 227.5136478  |
| Ism7        | 204559_s_at | 0.0236497   | 504.4814815  | 118.814118    | 429.8227273 | 113.3309227  |
| Isr         | 208190_s_at | 0.00353717  | 32.91111111  | 23.05185348   | 14.72272727 | 11.32380265  |
| LSS         | 211018_at   | 0.0184412   | 49.43703704  | 20.17022078   | 35.16818182 | 21.93875428  |
| LTB4R       | 216388_s_at | 0.0304477   | 44.66666667  | 35.19164018   | 68.94545455 | 37.61387443  |
| LTF         | 202018_s_at | 0.0011797   | 11.14444444  | 4.707141329   | 9.15        | 4.672487866  |
| LUZP1       | 221831_at   | 0.0139487   | 176.1481481  | 84.41863798   | 225.2681818 | 76.15356282  |
| Luzp2       | 215323_at   | 0.0194863   | 92.08888889  | 48.53352793   | 151.7954545 | 75.39088916  |
| LY96        | 206584_at   | 0.0269219   | 62.79259259  | 36.07197853   | 52.40909091 | 34.00425616  |
| LYN         | 210754_s_at | 0.00387816  | 86.93333333  | 26.05035065   | 72.90909091 | 30.51026227  |
| LYN         | 202625_at   | 0.0299683   | 42.44074074  | 22.4132217    | 35.05       | 14.78412115  |
| LYPD3       | 204952_at   | 0.00181451  | 27.18518519  | 13.33081173   | 21.25       | 6.771772645  |
| LYST        | 203518_at   | 0.00783448  | 158.5851852  | 52.07995852   | 220.0181818 | 82.56357802  |
| LYVE1       | 219059_s_at | 0.0186247   | 73.90740741  | 49.28148292   | 46.68181818 | 38.98938361  |
| lzt1        | 221722_x_at | 0.0138174   | 7.440740741  | 5.876763844   | 5.690909091 | 3.703011527  |
| MAD1L1      | 204857_at   | 0.00144244  | 138.9185185  | 71.45123693   | 91.05       | 40.00798432  |
| Mag         | 216617_s_at | 0.0253368   | 427.2925926  | 293.8231806   | 243.6545455 | 150.0109511  |
| MALT1       | 208309_s_at | 0.00790049  | 12.52222222  | 9.032221523   | 8.436363636 | 4.013019936  |
| MAMLD1      | 205088_at   | 0.000305986 | 198.0444444  | 39.80738561   | 251.5681818 | 38.87725968  |
| MAN1A1      | 221760_at   | 0.00225008  | 664.9037037  | 253.0865092   | 978.4727273 | 344.4956606  |
| MAN1A2      | 217922_at   | 0.000109243 | 739.7851852  | 245.9607109   | 1028.190909 | 189.3073915  |
| Man1b1      | 65884_at    | 0.00115524  | 298.1592593  | 67.98185991   | 230.1045455 | 55.59706636  |
| Man1b1      | 218636_s_at | 0.0321028   | 272.9259259  | 114.1268646   | 187.7181818 | 75.21334504  |
| MAP2K4      | 203266_s_at | 0.00289262  | 445.2814815  | 112.5375973   | 547.2318182 | 119.7569896  |
| MAP3K7      | 206853_s_at | 0.0183143   | 291.9444444  | 81.61268441   | 365.9454545 | 117.8577744  |
| MAP4        | 243_g_at    | 0.00501431  | 769.3703704  | 317.5963304   | 524.0909091 | 140.4534728  |
| MAP4        | 212567_s_at | 0.0267481   | 743.3814815  | 307.7136544   | 558.8772727 | 229.9417544  |
| MAP4        | 33850_at    | 0.0213182   | 589.1296296  | 263.9529384   | 415.0909091 | 174.8443087  |
| map4k3      | 218311_at   | 0.028282    | 84.14074074  | 28.4192007    | 115.5227273 | 37.63349486  |
| MAPK12      | 206106_at   | 0.0176649   | 193.5962963  | 60.81327968   | 152.4227273 | 49.13955764  |
| MAPK11P1L   | 212643_at   | 0.0134377   | 1193.244444  | 311.402646    | 1412.327273 | 276.5902542  |
| MAPK4       | 204707_s_at | 0.0162311   | 56.58518519  | 26.34678062   | 49.72727273 | 23.32266794  |
| MAPKAPK5    | 212871_at   | 0.0177362   | 87.97037037  | 33.92718237   | 101.1909091 | 28.06287005  |
| MARCKS      | 201670_s_at | 0.00652283  | 623.1444444  | 202.1620073   | 876.0545455 | 268.5450813  |
| MARK1       | 221047_s_at | 0.00268172  | 217.0481481  | 39.43224345   | 273.8863636 | 74.05919959  |
| masp1       | 213749_at   | 0.00759258  | 63.33703704  | 48.24689028   | 39.83181818 | 31.99942539  |
| mat1a       | 205813_s_at | 0.0208354   | 11.72222222  | 4.213379179   | 9.827272727 | 4.584153016  |

| Gene symbol | Probeset    | P value     | Mean Control | STDEV Control | Mean Heroin | STDEV Heroin |
|-------------|-------------|-------------|--------------|---------------|-------------|--------------|
| matK        | 206267_s_at | 0.00775356  | 254.4740741  | 70.15587366   | 193.6954545 | 56.90930527  |
| MATR3       | 200626_s_at | 0.0270047   | 1561.840741  | 559.6755862   | 1947.090909 | 540.1925591  |
| MAX         | 209332_s_at | 0.0283614   | 1098.018519  | 200.8823039   | 965.3545455 | 164.0095547  |
| MBD3        | 41160_at    | 0.0109025   | 909.2185185  | 369.0907935   | 679.9090909 | 143.1866711  |
| Mbnl1       | 201152_s_at | 0.00438623  | 564.1444444  | 155.2027665   | 803.1454545 | 307.1236244  |
| Mbnl1       | 201153_s_at | 0.0129767   | 465.3296296  | 131.9101      | 618.9772727 | 168.4969971  |
| Mboat2      | 213288_at   | 0.0126961   | 381.4666667  | 110.2853676   | 483.2227273 | 110.0845603  |
| MBP         | 216567_at   | 0.021563    | 5.266666667  | 2.561399858   | 4.1         | 1.304570719  |
| MCM3APAS    | 220459_at   | 0.0186614   | 68.9037037   | 29.48066487   | 91.05454545 | 32.73976361  |
| Mcm5        | 216237_s_at | 0.00408545  | 45.34814815  | 32.73758567   | 15.57727273 | 6.672896981  |
| mcoln1      | 219952_s_at | 0.00743378  | 128.9111111  | 87.29707605   | 78.24090909 | 54.25168559  |
| MCTP1       | 220122_at   | 0.00133426  | 246.4259259  | 129.1777684   | 651.3772727 | 535.0833108  |
| MCTS1       | 218163_at   | 0.0312418   | 401.2074074  | 100.786606    | 426.5545455 | 138.8589134  |
| Mdk         | 209035_at   | 0.0249072   | 71.34074074  | 30.57333251   | 56.46818182 | 24.18687929  |
| ME1         | 204059_s_at | 0.0254257   | 501.2444444  | 95.98351354   | 640.2818182 | 188.9308557  |
| mecp2       | 202617_s_at | 0.00928481  | 149.8111111  | 54.33995791   | 195.5545455 | 48.9134194   |
| MED13       | 201986_at   | 0.0316463   | 232.937037   | 53.7435946    | 298.2136364 | 88.33284616  |
| Med13l      | 212209_at   | 0.0123103   | 250.837037   | 92.49649951   | 329.7681818 | 104.7967802  |
| med18       | 221650_s_at | 0.0102739   | 98.73333333  | 43.02632468   | 74.99090909 | 40.57849429  |
| MED23       | 218846_at   | 0.0319116   | 143.7851852  | 38.29033523   | 166.8227273 | 47.56077748  |
| med4        | 217843_s_at | 0.0232938   | 97.52222222  | 29.90257685   | 128.5818182 | 34.48982785  |
| Med7        | 204349_at   | 0.0185169   | 146.8666667  | 68.98584024   | 97.68181818 | 34.02812053  |
| MEF2A       | 212535_at   | 0.00739622  | 618.1962963  | 133.2180788   | 754.0909091 | 181.4328314  |
| MEF2C       | 209199_s_at | 0.015413    | 241.8222222  | 70.6084781    | 314.3954545 | 100.6226448  |
| MEF2C       | 209200_at   | 0.000759155 | 273.4037037  | 91.48482212   | 380.2863636 | 99.35132609  |
| Meis2       | 207480_s_at | 0.00825626  | 2407.488889  | 752.9868194   | 2983.709091 | 627.3177838  |
| mest        | 202016_at   | 0.0211948   | 354.6777778  | 100.5729713   | 452.4681818 | 106.3325349  |
| metap2      | 213899_at   | 0.00106687  | 39.23703704  | 14.67006759   | 56.05       | 17.59203689  |
| METTL13     | 212407_at   | 0.0270682   | 235.8074074  | 45.44788161   | 199.2590909 | 38.57274709  |
| MFNG        | 204153_s_at | 0.020597    | 118.0037037  | 39.04658442   | 99.20909091 | 38.07518763  |
| mfsd5       | 212861_at   | 0.0325104   | 286.8925926  | 45.55963063   | 260.9772727 | 51.03792177  |
| MFSD6       | 219858_s_at | 0.0313959   | 40.35925926  | 14.73050888   | 52.01818182 | 18.20459482  |
| MGA         | 212945_s_at | 0.00045475  | 69.94444444  | 32.57685981   | 110.4454545 | 35.89326409  |
| MGAT4C      | 207447_s_at | 0.00494801  | 55.52592593  | 18.19238202   | 83.90909091 | 38.03831288  |
| MIA3        | 212310_at   | 0.0109613   | 268.0518519  | 78.49398003   | 341.0681818 | 96.07658843  |
| MINA        | 213189_at   | 0.0270355   | 198.1925926  | 66.15773067   | 244.8272727 | 84.81595302  |
| MKI67       | 212021_s_at | 0.0011872   | 110.037037   | 34.75483528   | 81.79090909 | 29.4639232   |
| MKI67       | 212023_s_at | 0.0135367   | 54.4         | 25.85579834   | 36.36363636 | 25.06252268  |
| MKKS        | 218138_at   | 0.027233    | 521.4592593  | 105.5668591   | 566.5       | 112.4190714  |
| MKRN1       | 209845_at   | 0.00369483  | 534.0814815  | 154.4627663   | 655.5318182 | 171.175475   |

| Gene symbol | Probeset    | P value     | Mean Control | STDEV Control | Mean Heroin | STDEV Heroin |
|-------------|-------------|-------------|--------------|---------------|-------------|--------------|
| MLLT3       | 204917_s_at | 0.000483566 | 193.4888889  | 53.53842857   | 282.75      | 84.9403362   |
| MLST8       | 220587_s_at | 0.0157768   | 380.9        | 111.0358362   | 290.7363636 | 110.7723128  |
| Mmp28       | 219909_at   | 0.00352596  | 86.87407407  | 48.35755921   | 58.37727273 | 29.97516324  |
| Mnat1       | 203565_s_at | 0.000137528 | 83.55185185  | 52.73736356   | 134.7045455 | 39.72786568  |
| Moap1       | 212508_at   | 0.0196982   | 1936.311111  | 460.5236771   | 2100.222727 | 480.9296018  |
| MOBKL3      | 202919_at   | 0.00952192  | 630.0962963  | 167.2018276   | 829.6       | 271.3237655  |
| Mocs1       | 211673_s_at | 0.0174711   | 110.1962963  | 44.57199432   | 88.35909091 | 30.29195491  |
| Mocs1       | 213181_s_at | 0.0284509   | 51.68518519  | 28.28103066   | 37.35454545 | 21.12522138  |
| MOCS2       | 218212_s_at | 0.00349281  | 223.4        | 71.41462358   | 312.8181818 | 134.2930968  |
| MON2        | 212755_at   | 0.00766647  | 16.43333333  | 11.31316456   | 26.42272727 | 15.71208003  |
| mpg         | 203686_at   | 0.0294647   | 305.2703704  | 78.33139568   | 258.6454545 | 72.55557953  |
| MPHOSPH9    | 215731_s_at | 0.0153868   | 106.1        | 64.86673914   | 118.9590909 | 42.60048803  |
| MPHOSPH9    | 221965_at   | 0.0015147   | 186.1814815  | 38.17299727   | 239.9409091 | 50.83824637  |
| mpl         | 207550_at   | 0.031009    | 19.61481481  | 17.59691196   | 10.15909091 | 8.928587532  |
| MPPE1       | 214071_at   | 0.00417736  | 1909.351852  | 554.489421    | 2450.686364 | 609.6296513  |
| MPPED2      | 205413_at   | 0.0146102   | 390.9444444  | 116.7651862   | 489.2272727 | 155.2927594  |
| Mpst        | 203524_s_at | 0.00118777  | 387.8037037  | 101.5812387   | 275.05      | 98.45279144  |
| MRM1        | 219967_at   | 0.0267418   | 80.06296296  | 24.88333004   | 61.05454545 | 28.42768147  |
| Mrpl24      | 218270_at   | 0.001717    | 660.2296296  | 196.765518    | 502.85      | 128.5674577  |
| mrpl28      | 204599_s_at | 0.01228     | 666.937037   | 146.4098913   | 525.8181818 | 153.02446    |
| Mrpl3       | 208787_at   | 0.0182792   | 487.9555556  | 180.2583559   | 627.8590909 | 184.3932177  |
| MRPS11P1    | 217386_at   | 0.00775714  | 42.75555556  | 20.76013809   | 38.75909091 | 35.89538582  |
| mRpS12      | 204331_s_at | 0.00798643  | 284.5481481  | 149.2261278   | 213.7954545 | 62.32498908  |
| mrps18a     | 218385_at   | 0.00852943  | 418.0925926  | 187.474991    | 282.2636364 | 122.4591926  |
| MRPS2       | 218001_at   | 0.00180614  | 271.1962963  | 57.86137599   | 199.3954545 | 53.71898199  |
| MRPS34      | 218112_at   | 0.00372163  | 247.5592593  | 77.37936646   | 191.1454545 | 58.59530883  |
| MRPS7       | 217932_at   | 0.019728    | 403.8        | 114.8369513   | 336.8       | 108.9996898  |
| mrto4       | 220688_s_at | 0.0332379   | 282.6185185  | 75.99502027   | 218.7590909 | 91.65575689  |
| msh3        | 210947_s_at | 0.0270298   | 109.3481481  | 28.70438683   | 130.9318182 | 30.69286231  |
| Msl1        | 212708_at   | 0.0285451   | 622.1148148  | 157.6690538   | 739.3772727 | 212.4517692  |
| Mst4        | 218499_at   | 0.00268942  | 137.0814815  | 53.38727187   | 203.15      | 74.33103402  |
| MT1F        | 210524_x_at | 0.00997164  | 1199.933333  | 502.8743382   | 1044.290909 | 365.3104484  |
| MT1F        | 213629_x_at | 0.0101016   | 1720.977778  | 711.1488875   | 1492.418182 | 581.06632    |
| MT1F        | 217165_x_at | 0.0320051   | 1355.744444  | 910.7122886   | 1159.604545 | 637.5540145  |
| MT1G        | 204745_x_at | 0.00755937  | 1624.140741  | 699.8649278   | 1366.709091 | 558.8982673  |
| MT1H        | 206461_x_at | 0.00702458  | 2858.644444  | 1263.144082   | 2424.872727 | 1049.841766  |
| MT1X        | 204326_x_at | 0.0204046   | 2181.337037  | 1699.802108   | 1749.331818 | 1135.343001  |
| MT1X        | 208581_x_at | 0.0320482   | 3644.903704  | 2003.696675   | 3213.040909 | 1473.468335  |
| MT3         | 205970_at   | 0.0127675   | 6353.27037   | 1355.519882   | 5140.368182 | 1902.231473  |
| MTDH        | 212248_at   | 0.00129158  | 343.6        | 81.33171867   | 444.4318182 | 108.1533981  |

| Gene symbol | Probeset    | P value    | Mean Control | STDEV Control | Mean Heroin | STDEV Heroin |
|-------------|-------------|------------|--------------|---------------|-------------|--------------|
| MTF2        | 209705_at   | 0.00752646 | 337.9555556  | 96.21729148   | 456.6136364 | 138.7180673  |
| mtg1        | 212767_at   | 0.0261828  | 141.9333333  | 54.09195874   | 95.06363636 | 46.56409352  |
| mtmr3       | 202198_s_at | 0.0153104  | 76.13333333  | 44.00057692   | 59.46818182 | 30.58946888  |
| mtmr3       | 211507_s_at | 0.0316295  | 20.0037037   | 18.08683077   | 15.02727273 | 8.274929539  |
| Mtus2       | 214961_at   | 0.0012307  | 57.65925926  | 32.03170616   | 79.74090909 | 29.13343128  |
| MTX2        | 203517_at   | 0.00078689 | 261.0962963  | 76.71271323   | 331.3954545 | 84.73175869  |
| MUC4        | 204895_x_at | 0.00362958 | 16.33703704  | 15.31713842   | 9.581818182 | 3.834509513  |
| mudeng      | 218139_s_at | 0.01749    | 356.3962963  | 84.17323017   | 462.9636364 | 145.5839982  |
| MUL1        | 218246_at   | 0.00232526 | 251.7666667  | 49.78189353   | 202.1363636 | 43.85982591  |
| mybbp1a     | 219098_at   | 0.0136317  | 304.8777778  | 62.13261458   | 236.6227273 | 65.37556651  |
| MYBPC1      | 214087_s_at | 0.00534914 | 549.6222222  | 249.3013782   | 444.7909091 | 159.3242633  |
| MYBPC3      | 208040_s_at | 0.0257052  | 52.62222222  | 28.88418962   | 39.22272727 | 19.64297843  |
| MYCBP2      | 201960_s_at | 0.0115605  | 2472.622222  | 1297.091594   | 2620.922727 | 914.1951094  |
| MYCBP2      | 201959_s_at | 0.0303808  | 658.4296296  | 205.5611734   | 713.7090909 | 175.8860966  |
| MYF6        | 206372_at   | 0.033408   | 23.16666667  | 23.7942624    | 43.22272727 | 31.11923202  |
| myh10       | 212372_at   | 0.00324402 | 1084.818519  | 414.2788498   | 1475.768182 | 518.0168773  |
| MYH8        | 206717_at   | 0.0162164  | 29.37037037  | 19.21979778   | 19.63636364 | 14.15511166  |
| MYH8        | 34471_at    | 0.0182134  | 21.68148148  | 14.92981109   | 37.98181818 | 24.63506282  |
| MYL6B       | 212082_s_at | 0.00205945 | 3893.533333  | 1067.590592   | 2744.813636 | 977.7425288  |
| MYLK        | 202555_s_at | 0.029287   | 303.8        | 102.6738376   | 227.1409091 | 78.46104074  |
| MYO5A       | 204527_at   | 0.0245532  | 157.5        | 28.33075252   | 190.2227273 | 41.91626496  |
| MYST4       | 212462_at   | 0.0268172  | 256.8296296  | 75.51645676   | 320.3954545 | 73.52098163  |
| MYST4       | 214496_x_at | 0.0258786  | 208.3222222  | 45.81430188   | 272.3       | 97.15249672  |
| MYT1L       | 210016_at   | 0.00534352 | 1820.333333  | 697.9613688   | 2383.354545 | 662.5065892  |
| N4BP2L1     | 213375_s_at | 0.0108905  | 418.6296296  | 140.3895372   | 549.5045455 | 180.3930378  |
| N4BP2L2     | 202259_s_at | 0.0125489  | 156.6222222  | 55.3234568    | 206.7454545 | 56.06471369  |
| NAA10       | 203025_at   | 0.00250034 | 379.2222222  | 99.53184776   | 275.4863636 | 75.96274961  |
| naa15       | 219158_s_at | 0.02078    | 116.962963   | 29.29685134   | 146.3318182 | 40.56124571  |
| naa50       | 217745_s_at | 0.0136827  | 382.237037   | 132.9906103   | 443.65      | 126.5403145  |
| NAAA        | 215178_x_at | 0.0323094  | 170.3851852  | 47.04757579   | 148.0136364 | 64.45145309  |
| NACA2       | 222018_at   | 0.0305259  | 49.65185185  | 30.48462879   | 68.22727273 | 25.89624319  |
| Nae1        | 202268_s_at | 0.0188153  | 441.3851852  | 125.2866213   | 523.8227273 | 119.0313201  |
| nagA        | 202943_s_at | 0.0270023  | 217.2592593  | 45.09026212   | 212.0045455 | 72.54877819  |
| NAMPT       | 217738_at   | 0.0123789  | 210.0851852  | 80.31135423   | 299.2090909 | 109.6734673  |
| NANS        | 218189_s_at | 0.0274755  | 272.7148148  | 61.4535954    | 212.3136364 | 50.15393728  |
| NAP1L1      | 212967_x_at | 0.0152149  | 2262.177778  | 708.9503456   | 2519.836364 | 659.3398188  |
| NAP1L1      | 208752_x_at | 0.0244715  | 2418.707407  | 692.020526    | 2648.263636 | 642.9279805  |
| NAP1L2      | 219368_at   | 0.0058633  | 700.5851852  | 181.0021944   | 885.9       | 290.4456412  |
| nap1l4      | 201414_s_at | 0.0142833  | 597.9962963  | 161.8449055   | 523.5636364 | 76.11755661  |
| Nars        | 200027_at   | 0.00601558 | 1909.4       | 422.4594828   | 2246.086364 | 466.7928186  |

| Gene symbol | Probeset    | P value     | Mean Control | STDEV Control | Mean Heroin | STDEV Heroin |
|-------------|-------------|-------------|--------------|---------------|-------------|--------------|
| Nat9        | 204382_at   | 0.0198767   | 208.9111111  | 52.56117559   | 179.4727273 | 40.19931511  |
| NAV3        | 204823_at   | 0.0029929   | 399.8444444  | 97.0417687    | 508.35      | 119.6141286  |
| NBEA        | 221207_s_at | 0.017819    | 628.2296296  | 299.3053584   | 739.5818182 | 302.8930593  |
| Nbl1        | 37005_at    | 0.0270619   | 1395.014815  | 367.8448667   | 1094.227273 | 316.3514459  |
| NBN         | 202907_s_at | 0.0237531   | 437.6407407  | 110.5725006   | 551.5636364 | 141.9277299  |
| NBPF1       | 213612_x_at | 0.0252434   | 1418.181481  | 570.3570056   | 1807.604545 | 262.7932149  |
| NBPF8       | 201103_x_at | 0.00781884  | 1150.937037  | 480.9664598   | 1564.909091 | 310.5769606  |
| Ncam1       | 217359_s_at | 0.0252565   | 229.6592593  | 93.10660251   | 179.1090909 | 83.45512001  |
| ncapd3      | 212789_at   | 0.00749314  | 58.91851852  | 20.75520393   | 75.18181818 | 19.63584275  |
| ncaph2      | 205086_s_at | 0.0261064   | 150.8962963  | 43.46716251   | 111.4545455 | 41.34085639  |
| ncf1        | 214084_x_at | 0.0305583   | 15.77777778  | 11.44597119   | 10.31818182 | 5.526010906  |
| ncl         | 200610_s_at | 0.0237478   | 1695.081481  | 535.5642941   | 1403.840909 | 438.4870956  |
| NCOA1       | 209106_at   | 0.00278102  | 718.9851852  | 196.108174    | 932.2136364 | 279.5563378  |
| NCOA1       | 210249_s_at | 0.0279886   | 406.2407407  | 64.72172539   | 480.1454545 | 95.22282003  |
| NCOA3       | 211352_s_at | 0.000711752 | 6.066666667  | 3.218336885   | 12.27727273 | 7.093587434  |
| NCOR1       | 200854_at   | 0.0044064   | 370.6592593  | 83.17678698   | 465.2272727 | 85.73880147  |
| Ncr1        | 217088_s_at | 0.0289044   | 17.64074074  | 17.22456339   | 11.83636364 | 10.18339196  |
| ndp         | 206022_at   | 0.012708    | 382.1814815  | 104.2156567   | 324.2136364 | 66.63396314  |
| Ndrp2       | 206453_s_at | 0.00727242  | 5699.422222  | 1465.594389   | 4397.963636 | 1584.630018  |
| NDRG3       | 221082_s_at | 0.0014794   | 340.037037   | 92.29127031   | 259.0318182 | 46.75086336  |
| Ndufa13     | 220864_s_at | 0.0263245   | 4369.422222  | 1593.729411   | 3178.177273 | 1288.280411  |
| Ndufb7      | 202839_s_at | 0.00830398  | 597.6518519  | 213.8378616   | 414.4181818 | 171.7268724  |
| NDUFS6      | 203606_at   | 0.0316107   | 1738.066667  | 614.8066306   | 1228.795455 | 492.9918733  |
| NDUFS7      | 211752_s_at | 0.0200295   | 1020.837037  | 337.5049357   | 773.2681818 | 212.0876108  |
| Ndufs8      | 203190_at   | 0.00426607  | 1702.155556  | 519.3160475   | 1221.809091 | 349.0025991  |
| Ndufv1      | 208714_at   | 0.00704187  | 2303.818519  | 665.9827966   | 1589.068182 | 581.94297    |
| NECAB3      | 210720_s_at | 0.00351736  | 303.6777778  | 57.11141832   | 263.3045455 | 56.99974501  |
| NECAP2      | 220731_s_at | 0.00267525  | 196.9925926  | 41.48733751   | 166.5       | 39.00828972  |
| nek1        | 213331_s_at | 0.0128023   | 184.7444444  | 50.6675312    | 239.6863636 | 76.57330316  |
| NENF        | 218406_x_at | 0.0248874   | 127.4851852  | 52.41102867   | 100.1818182 | 64.10873677  |
| NETO2       | 218888_s_at | 0.00148953  | 579.8037037  | 230.9257964   | 866.1909091 | 314.754114   |
| Neu1        | 208926_at   | 0.0160723   | 191.4851852  | 80.96479626   | 155.3954545 | 50.07560453  |
| NF1         | 212678_at   | 0.0214496   | 165.3481481  | 68.46779912   | 229.0681818 | 85.41454313  |
| NFAT5       | 208003_s_at | 0.00676358  | 367.9555556  | 111.64608     | 525.5772727 | 217.8120442  |
| NFKBIB      | 214062_x_at | 0.00838013  | 34.87407407  | 24.10430208   | 23.68181818 | 16.36289753  |
| NFYB        | 218128_at   | 0.00623552  | 69.73703704  | 20.93282568   | 98.90454545 | 36.49553759  |
| NFYB        | 218127_at   | 0.0236719   | 494.4555556  | 143.3724315   | 579.9227273 | 142.9052631  |
| Ngfr        | 205858_at   | 0.0171769   | 27.69259259  | 19.71884936   | 17.23636364 | 9.865598983  |
| NHP2L1      | 201076_at   | 0.0235461   | 1182.196296  | 234.2313673   | 884.1727273 | 310.9519718  |
| nipbl       | 213918_s_at | 0.0060853   | 83.84074074  | 37.84092473   | 112.3454545 | 27.10959639  |



| Gene symbol | Probeset    | P value     | Mean Control | STDEV Control | Mean Heroin | STDEV Heroin |
|-------------|-------------|-------------|--------------|---------------|-------------|--------------|
| NKAIN1      | 219438_at   | 0.0117389   | 217.6259259  | 60.11390849   | 162.3863636 | 57.61898906  |
| Nkiras2     | 222105_s_at | 0.0161633   | 161.7185185  | 59.63210311   | 122.1545455 | 50.75906419  |
| NKRF        | 205004_at   | 0.0265833   | 330.3518519  | 58.21064779   | 363.1636364 | 66.21460453  |
| NKTR        | 202380_s_at | 0.0284952   | 143.5925926  | 67.68729529   | 197.9136364 | 51.97939423  |
| nlg1        | 205893_at   | 0.00132289  | 160.8444444  | 36.97237361   | 221.7272727 | 68.6637853   |
| NLGN4X      | 221933_at   | 0.0156731   | 308.3888889  | 164.155989    | 501.6454545 | 278.0373985  |
| NLRP2       | 221690_s_at | 0.0188628   | 59.75925926  | 37.169914     | 83.54545455 | 48.86561482  |
| Nme1        | 201268_at   | 0.00586983  | 2079.22963   | 533.3835738   | 1572.527273 | 404.7202869  |
| NME7        | 216070_at   | 0.0040344   | 23.63333333  | 15.27967479   | 42.75454545 | 19.53989149  |
| NMT1        | 201157_s_at | 0.00950116  | 243.3666667  | 48.02858924   | 203.4954545 | 47.85937215  |
| NMT2        | 215743_at   | 0.0140372   | 88.6037037   | 34.66784679   | 124.1954545 | 42.89695824  |
| NMUR1       | 221383_at   | 0.00739087  | 14.67407407  | 17.59599151   | 9.040909091 | 7.131797282  |
| noc2l       | 202115_s_at | 0.000408836 | 238.4333333  | 38.64362819   | 186.9272727 | 52.57698376  |
| Noc4l       | 218860_at   | 0.032703    | 126.6037037  | 58.80371836   | 74.94545455 | 51.71186405  |
| Nol4        | 206045_s_at | 0.000996062 | 98.01111111  | 27.88000846   | 130.4681818 | 32.05384438  |
| NOL8        | 218244_at   | 0.00431369  | 93.4         | 46.28617504   | 117.0181818 | 43.92161455  |
| Nomo1       | 221853_s_at | 0.0213227   | 1795.381481  | 734.7033933   | 1383.431818 | 566.6234043  |
| nosip       | 217950_at   | 0.00782822  | 691.6222222  | 243.1099298   | 463.8772727 | 180.7511863  |
| NOX3        | 221089_at   | 0.0159956   | 7.125925926  | 7.967269226   | 4.004545455 | 1.780175827  |
| NPAS2       | 213462_at   | 0.00967169  | 461.6777778  | 120.4830608   | 578.7136364 | 151.5812254  |
| Nploc4      | 217796_s_at | 0.0330292   | 513.7185185  | 112.3092949   | 442.4772727 | 79.52528159  |
| NPPA        | 209957_s_at | 0.0153401   | 165.1259259  | 59.85239275   | 212.1590909 | 103.9356424  |
| NPRL3       | 214273_x_at | 0.00343058  | 320.5259259  | 92.53590818   | 261.8090909 | 77.70801827  |
| NPY         | 206001_at   | 0.00170038  | 1454.974074  | 468.0301968   | 1768.209091 | 500.3834938  |
| Npy1r       | 205440_s_at | 0.000981546 | 143.3444444  | 36.40422982   | 205.05      | 58.59031084  |
| NQO2        | 203814_s_at | 0.0225766   | 267.1703704  | 78.74450806   | 199.3363636 | 98.13652563  |
| NR1D2       | 209750_at   | 0.00816493  | 288.3333333  | 93.36505276   | 417.4090909 | 146.1135009  |
| NR1H3       | 203920_at   | 0.0175212   | 222.7777778  | 53.21730729   | 178.7681818 | 53.65180853  |
| NR3C1       | 216321_s_at | 0.0312343   | 561.9259259  | 211.0794247   | 636.4954545 | 169.3807362  |
| NR3C2       | 205259_at   | 0.00816716  | 253.3111111  | 73.68063274   | 342.7681818 | 112.4575577  |
| nrbf2       | 221803_s_at | 0.0108624   | 50.55555556  | 22.8450017    | 65.39090909 | 20.0814036   |
| NRIP1       | 202599_s_at | 0.000996849 | 330.7888889  | 83.60516792   | 470.2681818 | 124.7130703  |
| NRIP1       | 202600_s_at | 0.00871199  | 189.4592593  | 65.14953367   | 282.7727273 | 105.195189   |
| NRIP2       | 215104_at   | 0.0211284   | 112.9407407  | 65.73432109   | 63.34090909 | 42.58051935  |
| NRXN1       | 209914_s_at | 0.0167878   | 396.362963   | 147.2870357   | 493.5636364 | 72.17466608  |
| Nrxn3       | 205795_at   | 0.00672653  | 98.89259259  | 61.47012361   | 154.8590909 | 76.98241394  |
| Nrxn3       | 215021_s_at | 0.0121773   | 10.92592593  | 5.488000378   | 18.61363636 | 11.82613311  |
| nsfl1c      | 220248_x_at | 0.0153713   | 679.5259259  | 236.5113131   | 564.2863636 | 152.5713238  |
| NT5C        | 219214_s_at | 0.00142903  | 99.68888889  | 28.1936072    | 80.63181818 | 23.96597561  |
| nt5m        | 219708_at   | 0.0132711   | 103.4666667  | 58.01403013   | 70.20454545 | 31.68258463  |

| Gene symbol | Probeset    | P value     | Mean Control | STDEV Control | Mean Heroin | STDEV Heroin |
|-------------|-------------|-------------|--------------|---------------|-------------|--------------|
| nth1        | 209731_at   | 0.0107192   | 294.1925926  | 83.01374273   | 214.8136364 | 56.48208562  |
| NTRK3       | 213960_at   | 2.11708E-05 | 764.5296296  | 257.242736    | 1046.509091 | 211.7424827  |
| NTRK3       | 215311_at   | 0.00482121  | 1043.777778  | 396.3627712   | 1222.745455 | 229.1469766  |
| NUBP2       | 218227_at   | 0.00206251  | 218.7555556  | 86.66578747   | 161.85      | 53.34984938  |
| nudC        | 201173_x_at | 0.000146762 | 1235.118519  | 170.9428088   | 958.9772727 | 188.5699818  |
| nudC        | 210574_s_at | 0.00068796  | 1024.066667  | 132.2366817   | 841.4772727 | 171.593459   |
| NUDT11      | 219855_at   | 0.0118881   | 799.5851852  | 180.9022977   | 978.25      | 235.5635103  |
| Nudt18      | 219665_at   | 0.00320209  | 176.2703704  | 58.48647322   | 122.6045455 | 41.30991438  |
| NUDT3       | 211973_at   | 0.0205512   | 492.0592593  | 188.1195922   | 733.2227273 | 354.8558821  |
| NUDT4       | 212181_s_at | 0.0282557   | 512.2148148  | 113.7349507   | 582.1272727 | 141.7815092  |
| NUFIP1      | 205136_s_at | 0.00185507  | 185.8481481  | 57.0609955    | 242.4545455 | 57.21169317  |
| NUP188      | 214675_at   | 0.0152715   | 43.77037037  | 41.88637391   | 21.27272727 | 14.58499496  |
| nupl1       | 204435_at   | 0.0320058   | 210.5111111  | 77.52516878   | 256.85      | 90.20482381  |
| nupr1       | 209230_s_at | 0.00122029  | 285.1777778  | 83.76606314   | 211.1818182 | 74.81500127  |
| oaz1        | 215952_s_at | 0.0312106   | 1864.17037   | 818.5289722   | 1546.777273 | 635.9205266  |
| OCA2        | 206498_at   | 0.00996736  | 189.6518519  | 73.88122157   | 246.2681818 | 92.31910697  |
| ODC1        | 200790_at   | 0.021194    | 493.4296296  | 178.9872617   | 431.3181818 | 86.31704923  |
| Ogt         | 209240_at   | 0.000577659 | 1242.733333  | 272.9182633   | 1558.063636 | 413.672687   |
| Ola1        | 219293_s_at | 0.00732211  | 1332.377778  | 252.2375717   | 1489.422727 | 285.5610233  |
| omd         | 205907_s_at | 0.0264777   | 84.85185185  | 47.63479958   | 72.42272727 | 44.77924617  |
| Opa1        | 212213_x_at | 0.000188044 | 879.4333333  | 168.8793721   | 1125.831818 | 206.7946448  |
| Opa1        | 212214_at   | 0.00205893  | 483.3074074  | 129.8753187   | 625.0409091 | 189.2816411  |
| Opa1        | 214306_at   | 0.00161998  | 578.6518519  | 252.6631786   | 700.1318182 | 183.0725835  |
| OPA3        | 206357_at   | 0.0215938   | 33.64814815  | 17.00984716   | 45.80454545 | 17.00793869  |
| OPCML       | 214111_at   | 0.00377702  | 551.062963   | 229.3900527   | 663.6545455 | 243.0211469  |
| OR2H1       | 216817_s_at | 0.0177537   | 75.25925926  | 45.50307056   | 46.89090909 | 25.48685766  |
| OR5V1       | 221431_s_at | 0.0289156   | 56.65925926  | 27.62528467   | 74.81818182 | 46.70664923  |
| OSBPL8      | 212582_at   | 0.00149798  | 1502.937037  | 522.8920098   | 2122.35     | 600.060442   |
| OSBPL9      | 218047_at   | 0.0203341   | 274.9111111  | 78.06486126   | 356.2863636 | 87.25632353  |
| OSGIN1      | 219475_at   | 0.0148288   | 72.37407407  | 38.6086538    | 55.30909091 | 26.78133517  |
| oxct1       | 202780_at   | 0.000451054 | 618.2259259  | 210.934094    | 798.2       | 224.5434182  |
| p4hb        | 200656_s_at | 0.0167412   | 294.3037037  | 128.0619126   | 258.2863636 | 105.5251191  |
| p4hb        | 200654_at   | 0.0228799   | 1105.892593  | 430.2401654   | 975.5181818 | 319.2252879  |
| PABPC1      | 215823_x_at | 0.0301238   | 1265.362963  | 367.7423901   | 1634.336364 | 317.0318214  |
| Pacrg       | 214204_at   | 0.0163594   | 180.4222222  | 50.02961687   | 225.4409091 | 56.91753148  |
| paf1        | 202093_s_at | 0.00541661  | 382.2111111  | 111.2205098   | 271.6681818 | 86.78801973  |
| Pafah1b1    | 200816_s_at | 0.00452016  | 1393.685185  | 451.1636107   | 1641.122727 | 470.6019711  |
| PAFAH1B3    | 203228_at   | 0.0233705   | 286.9592593  | 128.6470851   | 209.0681818 | 94.72228775  |
| Paip1       | 208051_s_at | 0.0127753   | 466.6333333  | 120.0287466   | 592.7818182 | 167.2491146  |
| Paip1       | 209064_x_at | 0.000669377 | 656.5222222  | 171.3029555   | 878.4363636 | 194.0530721  |

| Gene symbol | Probeset    | P value     | Mean Control | STDEV Control | Mean Heroin | STDEV Heroin |
|-------------|-------------|-------------|--------------|---------------|-------------|--------------|
| Pak3        | 214078_at   | 0.0134751   | 64.38148148  | 35.34816976   | 88.31363636 | 27.22181015  |
| Pak3        | 214607_at   | 0.00219269  | 887.1407407  | 315.8005666   | 1123.322727 | 211.9575203  |
| pak7        | 213990_s_at | 0.00768676  | 142.3777778  | 38.50394918   | 184         | 39.51563886  |
| palld       | 200897_s_at | 0.0280808   | 429.0185185  | 134.5704706   | 587.1090909 | 161.9514798  |
| PANK3       | 218433_at   | 0.0128357   | 128.3407407  | 39.40932396   | 170.9772727 | 60.06057206  |
| PAOX        | 50400_at    | 0.0254002   | 127.2592593  | 39.77307032   | 100.0227273 | 32.55047263  |
| PAPSS2      | 203058_s_at | 0.0139958   | 101.0222222  | 50.02099047   | 74.45454545 | 27.83346268  |
| PARD6A      | 205245_at   | 0.00234354  | 358.7333333  | 77.42913385   | 291.4272727 | 41.28644632  |
| parp6       | 219639_x_at | 0.0282237   | 981.0074074  | 121.4438678   | 873.3909091 | 92.35229086  |
| PARVB       | 216253_s_at | 0.00581607  | 50.05555556  | 21.9056602    | 36.22727273 | 18.92524597  |
| PATZ1       | 209431_s_at | 0.00558904  | 173.3962963  | 55.49718968   | 126.7318182 | 42.9532014   |
| PATZ1       | 210581_x_at | 0.0275097   | 80.05185185  | 34.92717005   | 70.56363636 | 37.04426625  |
| pbrm1       | 220355_s_at | 0.00822954  | 238.4148148  | 57.96984431   | 300.4681818 | 70.61227727  |
| PBX1        | 212148_at   | 0.00390681  | 628.8259259  | 166.9632308   | 795.6818182 | 165.7736427  |
| PBX1        | 212151_at   | 0.00170508  | 810.5148148  | 150.279851    | 994.7227273 | 133.537289   |
| PCBP2       | 213264_at   | 0.0265855   | 69.84074074  | 37.08354662   | 48.21818182 | 27.07190841  |
| PCDH1       | 203918_at   | 0.02889     | 77.34074074  | 29.60649954   | 51.44090909 | 31.88749059  |
| PCDH9       | 216456_at   | 0.0218645   | 105.9962963  | 59.48816612   | 166.7136364 | 62.46355353  |
| pcdha13     | 210674_s_at | 0.00112672  | 365.3296296  | 73.46393053   | 473.6045455 | 120.1915593  |
| PCDHB17     | 216355_at   | 0.0323034   | 61.65185185  | 27.82099885   | 59.58181818 | 27.60754963  |
| PCDHGB6     | 221682_s_at | 0.0233157   | 21.1         | 22.79613665   | 12.83636364 | 14.00467764  |
| PCIF1       | 222045_s_at | 0.0083298   | 47.48148148  | 37.80981799   | 25.66818182 | 14.06939896  |
| PCLO        | 213558_at   | 0.00561053  | 1164.025926  | 447.7714712   | 1481.227273 | 323.3350189  |
| pcm1        | 214118_x_at | 0.0178852   | 418.4888889  | 144.6597529   | 516.6136364 | 119.2403587  |
| pcm1        | 214937_x_at | 0.0272715   | 370.3703704  | 129.1438787   | 444.1590909 | 96.27715775  |
| pcmt2       | 212406_s_at | 0.0173291   | 314.2962963  | 114.5178739   | 424.6909091 | 151.3906266  |
| PCNT        | 203660_s_at | 0.0316703   | 485.9074074  | 208.8727657   | 586.4909091 | 116.6115975  |
| PCSK5       | 205559_s_at | 0.0103754   | 32.95185185  | 16.12311695   | 44.11363636 | 14.55872494  |
| PCYT2       | 209577_at   | 0.00546591  | 371.5851852  | 94.31290271   | 298.0954545 | 84.25713183  |
| PDAP1       | 202290_at   | 0.000864111 | 219.4962963  | 65.25126277   | 165.1363636 | 59.97543581  |
| PDE3B       | 222330_at   | 0.00185479  | 13.60740741  | 9.897044078   | 28.93181818 | 16.41095413  |
| PDE4DIP     | 205872_x_at | 0.00812493  | 577.0444444  | 269.806183    | 722.9681818 | 281.2508106  |
| PDE4DIP     | 213388_at   | 0.0161011   | 308.1222222  | 111.7826439   | 399.8681818 | 105.0305551  |
| PDE4DIP     | 214129_at   | 0.014375    | 161.1407407  | 37.31469353   | 136.9636364 | 48.15849374  |
| Pde6a       | 206623_at   | 0.00615209  | 25.52962963  | 11.92185501   | 45.1        | 26.80007107  |
| Pdgfb       | 217112_at   | 0.0272403   | 12.16666667  | 7.626925986   | 21.56818182 | 17.94166172  |
| PDGFC       | 218718_at   | 0.00300091  | 286.4592593  | 56.54650407   | 367.3863636 | 95.04019348  |
| pdgfra      | 203131_at   | 0.0123004   | 453.0851852  | 181.0089346   | 610.7772727 | 231.434946   |
| Pdha1       | 200979_at   | 0.0261715   | 416.2592593  | 95.3354977    | 466.0636364 | 97.89734441  |
| PDHX        | 203067_at   | 1.90714E-05 | 329.5592593  | 91.50781496   | 488.5954545 | 137.2156921  |

| Gene symbol | Probeset    | P value     | Mean Control | STDEV Control | Mean Heroin | STDEV Heroin |
|-------------|-------------|-------------|--------------|---------------|-------------|--------------|
| PDIA3       | 208612_at   | 0.00809159  | 587.3185185  | 205.8843907   | 457.1772727 | 155.698206   |
| Pdia4       | 208658_at   | 0.0287278   | 259.6888889  | 75.59043658   | 212.6227273 | 87.54733105  |
| PDS5A       | 217331_at   | 0.0175755   | 59.48888889  | 39.13963497   | 83.28636364 | 38.45612584  |
| pdxK        | 202671_s_at | 0.00251715  | 488.3851852  | 112.5221917   | 375.1590909 | 113.9445172  |
| pdxK        | 218019_s_at | 0.0243032   | 2347.755556  | 763.6293328   | 1866.822727 | 588.2341143  |
| Pdzd2       | 209493_at   | 0.0106524   | 712.5740741  | 270.4992416   | 1020.509091 | 340.4380468  |
| PECI        | 218025_s_at | 0.00377964  | 609.1444444  | 221.406779    | 494.9681818 | 129.5211304  |
| pef1        | 217923_at   | 0.00448422  | 1036.585185  | 349.4792331   | 766.5954545 | 253.3402765  |
| PEG10       | 212092_at   | 0.007902    | 444.0074074  | 316.1883372   | 878.8090909 | 656.5997824  |
| PEG10       | 212094_at   | 0.0200674   | 2143.344444  | 957.7735794   | 2951.336364 | 1087.29981   |
| PEG3        | 209243_s_at | 0.0231055   | 993.2074074  | 561.5193578   | 1586.522727 | 968.034713   |
| pelp1       | 215354_s_at | 0.0104223   | 242.6703704  | 65.76923418   | 200.2863636 | 65.38190587  |
| PES1        | 202212_at   | 0.00557398  | 226.3296296  | 96.24840784   | 138.0772727 | 62.16648869  |
| Pex16       | 221604_s_at | 0.00355721  | 316.8925926  | 80.19340528   | 245.2772727 | 72.70145693  |
| Pex16       | 49878_at    | 0.000128853 | 1109.859259  | 308.1108857   | 839.0136364 | 125.85519    |
| pex3        | 203969_at   | 0.00690227  | 55.18518519  | 41.14488195   | 73.18636364 | 41.56555689  |
| pfkp        | 201037_at   | 0.00160472  | 727.8555556  | 193.7870071   | 592.5954545 | 136.1110978  |
| PGAP1       | 213469_at   | 0.00512978  | 251.6296296  | 74.53540106   | 347.0454545 | 113.8057774  |
| PGAP1       | 220576_at   | 0.00326981  | 94.45185185  | 35.15616119   | 143.3045455 | 45.62207566  |
| Pgcp        | 208454_s_at | 0.0186501   | 70.73333333  | 47.17870282   | 50.64090909 | 29.98246565  |
| pgls        | 218387_s_at | 0.00450102  | 419.3444444  | 106.8408462   | 312.6681818 | 88.96039454  |
| PGRMC2      | 213227_at   | 0.0094906   | 326.2222222  | 62.47537566   | 373.6090909 | 92.32286468  |
| PHACTR2     | 204049_s_at | 0.00707955  | 57.06666667  | 23.06819322   | 82.15       | 23.97891435  |
| Phb         | 200658_s_at | 0.00925199  | 346.9259259  | 98.87831135   | 273.4590909 | 102.4922049  |
| Phb         | 200659_s_at | 0.00630919  | 188.7851852  | 51.97499919   | 133.4863636 | 52.90327468  |
| PHF14       | 204525_at   | 0.0177606   | 50.0037037   | 16.45818668   | 57.27272727 | 13.82524199  |
| phf20       | 209423_s_at | 0.0255624   | 86.2962963   | 43.41071723   | 66.35909091 | 45.4878284   |
| PHF20L1     | 222133_s_at | 0.00939875  | 75.45555556  | 20.19562659   | 98.89545455 | 30.9097993   |
| PHF3        | 217954_s_at | 0.0028114   | 265.1666667  | 84.82487843   | 352.1818182 | 80.69868493  |
| PHGDH       | 201397_at   | 0.00719635  | 797.7        | 286.5126162   | 605.8818182 | 217.8610864  |
| phlda1      | 217997_at   | 0.0270878   | 433.8814815  | 90.02282632   | 513.3318182 | 134.9296832  |
| PI4KB       | 206138_s_at | 0.00357346  | 820.4740741  | 162.2102282   | 658.5545455 | 177.0295959  |
| PIAS1       | 217863_at   | 0.00620119  | 215.3888889  | 54.42485528   | 288.7       | 83.83812066  |
| PIAS1       | 217862_at   | 0.0212043   | 323.7037037  | 90.54264818   | 426.0636364 | 141.639773   |
| PIAS4       | 212881_at   | 0.00711412  | 196.4703704  | 78.71695553   | 146.9227273 | 55.12671923  |
| PICALM      | 212511_at   | 0.00130876  | 289.237037   | 89.55206542   | 379.5272727 | 119.8752216  |
| PIGG        | 218652_s_at | 0.0329427   | 356.9037037  | 83.94690392   | 407.5818182 | 90.63471235  |
| Pigt        | 217770_at   | 0.0113633   | 545.6333333  | 173.6752584   | 377.0090909 | 130.3244848  |
| PIH1D1      | 217872_at   | 0.00514305  | 676.6925926  | 143.5381454   | 548.0863636 | 114.3538214  |
| Pik3cb      | 212688_at   | 0.0309527   | 643.2851852  | 185.6765647   | 674.4727273 | 149.0877791  |

| Gene symbol | Probeset    | P value     | Mean Control | STDEV Control | Mean Heroin | STDEV Heroin |
|-------------|-------------|-------------|--------------|---------------|-------------|--------------|
| Pikfyve     | 213111_at   | 0.0168224   | 205.7481481  | 69.45552739   | 269.5818182 | 74.0275601   |
| PION        | 222150_s_at | 0.007497    | 81.82592593  | 20.07741924   | 110.3363636 | 31.88730969  |
| PION        | 213142_x_at | 0.0332104   | 82.97407407  | 24.17765326   | 120.6272727 | 51.29987637  |
| PITPNB      | 202522_at   | 0.00398569  | 1027.977778  | 248.8235447   | 1168.277273 | 172.4767698  |
| pitX1       | 208502_s_at | 0.0219056   | 4.492592593  | 3.989305504   | 3.090909091 | 0.867349049  |
| pja2        | 201133_s_at | 0.0206906   | 1109.681481  | 400.1176625   | 1514.431818 | 625.5883428  |
| PKIA        | 204612_at   | 0.0106376   | 1209.796296  | 281.2274531   | 1471.740909 | 331.159935   |
| PKP4        | 214874_at   | 0.0219974   | 327.1814815  | 64.33586174   | 376.3090909 | 128.198681   |
| PLAGL1      | 209318_x_at | 0.00582737  | 116.5222222  | 34.44977764   | 155.0909091 | 39.79204167  |
| PLCB1       | 213222_at   | 0.00529849  | 1709.981481  | 694.1408874   | 2234.118182 | 933.6525359  |
| Plcd1       | 205125_at   | 0.0243454   | 349.037037   | 105.4928767   | 293.5045455 | 116.8989775  |
| PLCL2       | 213309_at   | 0.0055843   | 392.7555556  | 157.9510862   | 456.8363636 | 130.8015274  |
| plekha1     | 219024_at   | 0.0259571   | 118.5814815  | 46.59380973   | 140.9681818 | 51.831305    |
| PLEKHA5     | 220952_s_at | 0.00704832  | 592.8555556  | 303.0597356   | 728.85      | 241.1356677  |
| PLEKHA5     | 214989_x_at | 0.0201931   | 453.5185185  | 205.9364167   | 584.9090909 | 211.3810099  |
| PLEKHG3     | 217044_s_at | 0.0130701   | 100.8        | 59.54594219   | 71.80909091 | 37.83076235  |
| PLEKHO1     | 218223_s_at | 0.0155666   | 292.6814815  | 88.29192853   | 234.6590909 | 79.54466645  |
| PLIN1       | 205913_at   | 0.00401749  | 38.52592593  | 30.57254415   | 23.35454545 | 13.03985565  |
| PLIN2       | 209122_at   | 0.00754039  | 150.4777778  | 49.30971455   | 117.6636364 | 36.47969488  |
| PLXNA1      | 221538_s_at | 0.0126255   | 99.95555556  | 58.45689624   | 139.6545455 | 42.61271582  |
| Plxna2      | 213030_s_at | 0.00287209  | 288.9333333  | 77.9092322    | 363.5363636 | 50.27829737  |
| plxnc1      | 213241_at   | 0.000616043 | 178.1222222  | 48.45816858   | 261.6       | 69.71380952  |
| Plxnd1      | 212235_at   | 0.0069182   | 40.93333333  | 25.55651355   | 23.10909091 | 9.609861457  |
| PML         | 211013_x_at | 0.0119987   | 19.03333333  | 12.16792758   | 13.50454545 | 4.866941669  |
| PMPCA       | 212088_at   | 0.00438036  | 342.9703704  | 115.1575637   | 273.1909091 | 71.83080589  |
| Pms1        | 213677_s_at | 0.00113762  | 264.1518519  | 48.26090447   | 328.7818182 | 71.61642294  |
| PMS2L1      | 216843_x_at | 0.0221284   | 386.3296296  | 70.14024311   | 447.1863636 | 62.10758174  |
| PMS2L1      | 217485_x_at | 0.0272993   | 662.4777778  | 152.8672862   | 586.7545455 | 118.2363079  |
| PMS2L2      | 215410_at   | 0.0178343   | 33.15185185  | 22.03380917   | 23.86818182 | 16.98827008  |
| PNLIPRP1    | 206694_at   | 0.00026794  | 62.58888889  | 40.19883593   | 34.32272727 | 20.15475678  |
| PNMA1       | 218224_at   | 0.0296014   | 1534.418519  | 448.4542881   | 1786.05     | 522.0754486  |
| PNMA2       | 209598_at   | 0.0169585   | 2894.959259  | 949.2569751   | 3747.436364 | 1130.907476  |
| PNMAL1      | 218824_at   | 0.000995335 | 1579.207407  | 396.7974264   | 1900.736364 | 523.3867991  |
| Pnmt        | 206793_at   | 0.00401379  | 367.537037   | 99.05655008   | 275.5363636 | 90.27371365  |
| pnpla3      | 220675_s_at | 0.0141124   | 18.37407407  | 17.83383976   | 12.17272727 | 8.182337646  |
| Pofut1      | 212349_at   | 0.0213767   | 27.94814815  | 17.81966007   | 21.07272727 | 17.17457095  |
| Pold2       | 201115_at   | 0.010032    | 406.6925926  | 91.71500979   | 317.8318182 | 94.69285882  |
| POLDIP2     | 217806_s_at | 0.0211809   | 815.9592593  | 196.6718162   | 669.8090909 | 127.6478448  |
| POLG        | 203366_at   | 0.026301    | 159.4592593  | 37.26049939   | 140.2181818 | 42.26881814  |
| POLR1D      | 218258_at   | 0.0219044   | 603.0148148  | 320.8739109   | 457.4318182 | 112.9625871  |

| Gene symbol | Probeset    | P value    | Mean Control | STDEV Control | Mean Heroin | STDEV Heroin |
|-------------|-------------|------------|--------------|---------------|-------------|--------------|
| POLR2E      | 213887_s_at | 0.0248458  | 280.8555556  | 144.8813688   | 224.0636364 | 109.9997989  |
| POLR3C      | 209382_at   | 0.0145062  | 269.9037037  | 116.606404    | 203.7909091 | 63.11129179  |
| POLR3C      | 210573_s_at | 0.0245183  | 205.0185185  | 86.7507439    | 155.1272727 | 32.20418757  |
| Polr3d      | 208361_s_at | 0.010942   | 74.78518519  | 29.44393243   | 62.71363636 | 24.34428251  |
| POMGNT1     | 217944_at   | 0.0164445  | 288.7444444  | 92.90969285   | 231.1181818 | 52.69564576  |
| por         | 208928_at   | 0.0256405  | 245.5814815  | 97.88589133   | 204.6136364 | 66.36976718  |
| POU3F3      | 208563_x_at | 0.0168421  | 50.55925926  | 27.60049135   | 69.51818182 | 32.27398534  |
| POU4F1      | 206940_s_at | 0.0267537  | 80.55555556  | 32.80982889   | 69.63181818 | 28.97528317  |
| ppan        | 221649_s_at | 0.0276895  | 185.0222222  | 62.23960113   | 140.8090909 | 47.38755019  |
| PPARA       | 206870_at   | 0.0217517  | 46.62962963  | 19.91340513   | 64.3        | 33.10261103  |
| PPARGC1A    | 219195_at   | 0.018884   | 70.05185185  | 26.67518828   | 92.10909091 | 32.10761531  |
| ppiB        | 200967_at   | 0.00120163 | 988.1740741  | 281.988679    | 741.7       | 213.9308633  |
| ppiB        | 200968_s_at | 0.00586939 | 871.0148148  | 228.5172468   | 710.1772727 | 212.5658664  |
| ppie        | 210502_s_at | 0.0163175  | 270.862963   | 43.234247     | 216.7681818 | 74.27164034  |
| Ppih        | 204228_at   | 0.00145408 | 181.7592593  | 52.14778747   | 134.6863636 | 49.17839533  |
| PPM1B       | 209296_at   | 0.024124   | 503.1444444  | 168.6993738   | 598.8136364 | 159.9347286  |
| Ppp1ca      | 200846_s_at | 0.0315772  | 634.5925926  | 351.6893504   | 457.0090909 | 207.5173542  |
| PPP1R12A    | 201603_at   | 0.00274427 | 248.8703704  | 96.78529694   | 326.9181818 | 108.879215   |
| PPP1R12A    | 201602_s_at | 0.0237944  | 264.8666667  | 118.6094107   | 333.7727273 | 107.7949605  |
| PPP1R12A    | 201604_s_at | 0.0300222  | 93.05925926  | 45.35965896   | 133.8272727 | 57.5672541   |
| PPP1R12B    | 201957_at   | 0.00621492 | 353.2703704  | 82.11072175   | 420.7181818 | 75.71671286  |
| PPP1R15A    | 202014_at   | 0.0187697  | 104.437037   | 52.58394862   | 83.70454545 | 34.43723728  |
| PPP1R2P9    | 207377_at   | 0.0180078  | 4.97037037   | 2.562272851   | 6.472727273 | 2.750096417  |
| ppp2r3c     | 218852_at   | 0.0257054  | 255.3148148  | 66.53966257   | 225.5227273 | 45.37884898  |
| PPP2R5C     | 201877_s_at | 0.0113822  | 726.237037   | 167.5574601   | 907.0681818 | 250.694233   |
| PPP2R5E     | 203338_at   | 0.00132651 | 205.6296296  | 56.7596472    | 280.5818182 | 88.84063654  |
| ppp3ca      | 202429_s_at | 0.00877559 | 4333.866667  | 1627.699854   | 5493.363636 | 1593.91902   |
| ppp3ca      | 202457_s_at | 0.0133229  | 5360.481481  | 2052.18388    | 6536.65     | 1670.026643  |
| PPP3CC      | 207000_s_at | 0.0264522  | 57.60740741  | 21.67369774   | 48.07272727 | 24.56005626  |
| PPPDE1      | 212371_at   | 0.00535329 | 330.2481481  | 100.9190474   | 431.7727273 | 81.62301369  |
| PQBP1       | 207769_s_at | 0.00202526 | 274.3851852  | 103.8600601   | 195.7863636 | 66.73113285  |
| PQBP1       | 214527_s_at | 0.0116757  | 401.962963   | 234.2219101   | 271.6227273 | 130.7782344  |
| PRAMEF11    | 217365_at   | 0.00347349 | 86.97777778  | 31.31838159   | 72.21363636 | 32.56595206  |
| PRDM2       | 216433_s_at | 0.0259492  | 5.551851852  | 6.579827585   | 3.681818182 | 2.270438675  |
| PRDX1       | 208680_at   | 0.00467737 | 2313.181481  | 691.9172744   | 1894.777273 | 519.1615979  |
| Prdx4       | 201923_at   | 0.00399271 | 492.2518519  | 169.2075839   | 384.6363636 | 87.4769877   |
| PRIM2       | 205628_at   | 0.0125095  | 25.97407407  | 17.31503554   | 19.79545455 | 12.61939087  |
| PRKAB1      | 201834_at   | 0.00428539 | 147.037037   | 48.34924348   | 103.0954545 | 42.9606739   |
| PRKACB      | 202741_at   | 0.00909168 | 5028.659259  | 997.9669477   | 6166.945455 | 1534.274477  |
| PRKACB      | 202742_s_at | 0.027255   | 944.4555556  | 332.0341958   | 1402.968182 | 722.3714843  |

| Gene symbol | Probeset    | P value     | Mean Control | STDEV Control | Mean Heroin | STDEV Heroin |
|-------------|-------------|-------------|--------------|---------------|-------------|--------------|
| PRKAR1A     | 200603_at   | 0.0113734   | 1960.181481  | 391.7150859   | 2271.481818 | 494.5126371  |
| prkar2b     | 203680_at   | 0.00320184  | 622.1407407  | 284.9749966   | 964.15      | 354.1755561  |
| PRKCB       | 207957_s_at | 0.0196179   | 1944.025926  | 939.3735489   | 2415.440909 | 962.3638227  |
| PRKCB       | 209685_s_at | 0.0273809   | 1100.77037   | 465.2784607   | 1437.595455 | 620.8745809  |
| Prkce       | 216753_at   | 0.00529442  | 68.91481481  | 31.38870085   | 55.99545455 | 20.39361425  |
| PRKCI       | 209678_s_at | 0.00035437  | 824.5259259  | 268.1529079   | 1230.795455 | 331.4291097  |
| PRKCI       | 213518_at   | 0.000469291 | 188.4444444  | 67.43924521   | 269.2909091 | 77.30373557  |
| PRKCI       | 209677_at   | 0.0281476   | 22.47777778  | 12.66464896   | 35.05454545 | 15.66335509  |
| Prosapip1   | 204447_at   | 0.030674    | 1610.388889  | 393.73382     | 1760.104545 | 371.2208795  |
| prpf4b      | 202127_at   | 0.00991357  | 163.362963   | 50.60551162   | 211.6863636 | 51.07904514  |
| PRPF6       | 208880_s_at | 0.0290265   | 578.237037   | 199.036831    | 388.5318182 | 195.2185525  |
| PRPS1       | 215486_at   | 0.0216161   | 26.80740741  | 22.06683774   | 36.70454545 | 20.19777162  |
| Prr16       | 220014_at   | 0.0293477   | 24.11851852  | 12.66084324   | 37.33636364 | 20.61563312  |
| Prx         | 222255_at   | 0.0114023   | 5.111111111  | 4.351333424   | 3.422727273 | 1.85727189   |
| PRY         | 208332_at   | 0.00964011  | 105.5333333  | 46.04831075   | 85.86363636 | 50.86554213  |
| PSD3        | 203354_s_at | 0.00529537  | 892.9333333  | 343.7866434   | 1566.322727 | 892.3632796  |
| PSD3        | 218613_at   | 0.00109207  | 1174.551852  | 380.5160225   | 1563.668182 | 376.0263268  |
| PSD3        | 203355_s_at | 0.0262506   | 384.0185185  | 112.8154246   | 474.85      | 162.6504981  |
| Psd4        | 215923_s_at | 0.0297192   | 35.9962963   | 30.58203949   | 28.86818182 | 21.41213244  |
| psen2       | 204262_s_at | 0.00483705  | 106.4555556  | 25.650676     | 89.74090909 | 20.72120283  |
| PSIP1       | 209337_at   | 0.0114422   | 708.1666667  | 214.5472854   | 922.1227273 | 307.9435275  |
| PSIP1       | 205961_s_at | 0.0325491   | 176.2888889  | 93.34501072   | 253.7227273 | 109.2389645  |
| psmb1       | 214289_at   | 0.0113838   | 36.15925926  | 22.99577318   | 61.98636364 | 32.81176176  |
| psmb9       | 204279_at   | 0.000854807 | 181.2703704  | 46.24396688   | 144.7545455 | 35.86993339  |
| psmc3       | 201267_s_at | 0.0181701   | 688.7518519  | 534.5097188   | 426.6136364 | 244.8319643  |
| psmc4       | 201252_at   | 0.006574    | 191.2777778  | 99.71159694   | 133.5454545 | 55.59001904  |
| Psmc11      | 208776_at   | 0.0116848   | 228.3037037  | 60.97988623   | 268.6681818 | 95.20081225  |
| PSMD4       | 200882_s_at | 0.0188747   | 2086.381481  | 375.097048    | 1635.763636 | 525.0120584  |
| PSMD4       | 210460_s_at | 0.00767721  | 1156.648148  | 409.4625355   | 813.9727273 | 327.9316482  |
| PSMD4       | 211609_x_at | 0.00241096  | 1572.088889  | 416.585354    | 1171.945455 | 374.838342   |
| PSMD8       | 200820_at   | 0.0330367   | 631.2037037  | 320.4182333   | 460.2227273 | 159.830538   |
| PSME3       | 200987_x_at | 0.0253145   | 259.7888889  | 98.16056444   | 207.9727273 | 58.09649757  |
| Psmc4       | 212222_at   | 0.0218301   | 410.3740741  | 99.50446682   | 464.6045455 | 111.2664519  |
| PSORS1C2    | 220635_at   | 0.0315349   | 22.61111111  | 7.345398001   | 29.09545455 | 11.53113703  |
| PSPC1       | 218371_s_at | 0.0171976   | 207.7555556  | 38.10898676   | 238.5454545 | 69.3541136   |
| PSPN        | 221373_x_at | 0.00590427  | 22.71111111  | 20.69768351   | 15.31363636 | 6.477749128  |
| PTDSS2      | 221005_s_at | 0.00626717  | 206.4222222  | 76.27360837   | 151.2454545 | 51.72634704  |
| ptgds       | 211663_x_at | 0.0264295   | 3720.137037  | 1416.782739   | 3262.640909 | 1615.840523  |
| Ptger4      | 204897_at   | 0.0215703   | 29.92592593  | 18.98249381   | 39.79090909 | 18.11442228  |
| PTH1R       | 205911_at   | 1.38696E-05 | 248.7037037  | 67.61496467   | 173.0454545 | 54.3350341   |

| Gene symbol | Probeset    | P value     | Mean Control | STDEV Control | Mean Heroin | STDEV Heroin |
|-------------|-------------|-------------|--------------|---------------|-------------|--------------|
| PTMA        | 200773_x_at | 0.00514876  | 3651.625926  | 875.1051583   | 3168.204545 | 748.8638407  |
| PTMA        | 211921_x_at | 0.00649965  | 2580.433333  | 1760.819832   | 1376.322727 | 507.5783467  |
| PTMA        | 200772_x_at | 0.0214542   | 2191.951852  | 1425.836905   | 1328.445455 | 425.8546295  |
| PTMAP7      | 208549_x_at | 0.011942    | 839.4074074  | 565.7985677   | 489.6636364 | 182.4983224  |
| PTN         | 208408_at   | 0.00989909  | 33.77037037  | 21.05138064   | 65.90909091 | 63.24626779  |
| PTPLA       | 219654_at   | 0.00136777  | 40.31851852  | 24.93966623   | 70.07727273 | 36.51578826  |
| ptplb       | 212640_at   | 0.0307853   | 1079.603704  | 240.2042248   | 1242.609091 | 273.6502267  |
| PTPN11      | 212610_at   | 0.0333857   | 1213.640741  | 344.7708127   | 1470.736364 | 415.7045752  |
| PTPN2       | 213136_at   | 0.00803189  | 164.1962963  | 69.36402571   | 244.5681818 | 85.87218845  |
| PTPN6       | 206687_s_at | 0.00456914  | 85.94074074  | 14.30968632   | 76.52727273 | 17.2893356   |
| PTPRT       | 205948_at   | 0.00970632  | 177.6555556  | 34.87075404   | 217.5545455 | 62.65960746  |
| PTTG1       | 203554_x_at | 0.0255044   | 426.9925926  | 108.9125193   | 379.7590909 | 56.12093794  |
| PUF60       | 209899_s_at | 0.023104    | 1820.996296  | 375.2928841   | 1393.722727 | 453.9978308  |
| PUM1        | 201165_s_at | 0.00818734  | 671.737037   | 150.2848223   | 827.3863636 | 160.6289996  |
| PUM2        | 216221_s_at | 0.000812839 | 841.6592593  | 180.2551466   | 1089.077273 | 221.1151756  |
| PUM2        | 201493_s_at | 0.0201982   | 296.0481481  | 82.50385711   | 392.2181818 | 118.5483853  |
| purA        | 204020_at   | 0.00329319  | 578.2333333  | 201.34267     | 811.8681818 | 196.546106   |
| PWP1        | 201607_at   | 0.0074101   | 327.937037   | 70.05835012   | 277.7909091 | 56.02193371  |
| pycard      | 221666_s_at | 0.0146069   | 39.85185185  | 27.49891425   | 19.92727273 | 13.64506476  |
| PYROXD1     | 219802_at   | 0.0200269   | 132.0925926  | 58.90174299   | 155.3772727 | 54.70638451  |
| QARS        | 217846_at   | 0.0120424   | 897.5185185  | 164.1974492   | 731.0909091 | 135.6949201  |
| Qpctl       | 220438_at   | 0.0252346   | 47.95555556  | 33.35590518   | 28.79090909 | 16.06951889  |
| R3HCC1      | 212866_at   | 0.00739113  | 364.0851852  | 112.9293438   | 269.2136364 | 80.45327716  |
| R3HCC1      | 35156_at    | 0.00656913  | 793.137037   | 172.3724013   | 618.9227273 | 124.0950171  |
| R3hdm1      | 202754_at   | 0.0128435   | 479.7814815  | 108.9374981   | 573.2045455 | 125.0031104  |
| Rab11fip2   | 203883_s_at | 0.00725913  | 350.8555556  | 103.7314704   | 468.9045455 | 137.0209455  |
| Rab11fip2   | 203884_s_at | 0.0200563   | 279.2666667  | 73.3147797    | 344.1227273 | 92.60324962  |
| RAB1A       | 213440_at   | 0.00717151  | 376.962963   | 124.1864732   | 455.5       | 137.3155005  |
| rab21       | 203885_at   | 0.00402234  | 347.5148148  | 82.58071438   | 426.4272727 | 107.3569799  |
| RAB22A      | 213405_at   | 0.00245395  | 514.6444444  | 153.6277627   | 681.7181818 | 201.2245077  |
| RAB22A      | 218360_at   | 0.026273    | 148.0703704  | 36.09260328   | 186.7681818 | 54.32702902  |
| RAB27B      | 207017_at   | 0.0177829   | 4.744444444  | 2.999786317   | 7.345454545 | 4.470722459  |
| RAB28       | 209084_s_at | 0.00643453  | 112.9185185  | 32.30816802   | 153.3772727 | 41.80569489  |
| Rab3gap1    | 213531_s_at | 0.00787257  | 1672.396296  | 698.4908862   | 1804.668182 | 437.4103145  |
| RAB40AL     | 215782_at   | 0.0241275   | 10.57407407  | 9.684269266   | 20.99090909 | 18.29121332  |
| rab40b      | 204547_at   | 0.000244673 | 1771.674074  | 312.6229107   | 2057.968182 | 528.5320735  |
| RAB6A       | 210406_s_at | 0.0118406   | 962.8296296  | 313.513269    | 1186.390909 | 347.4537817  |
| RAB6A       | 201047_x_at | 0.0221695   | 1160.211111  | 294.9118608   | 1349.131818 | 385.5365332  |
| Rabgap1l    | 203020_at   | 5.08183E-05 | 747.0407407  | 130.7621395   | 947.3590909 | 151.5182518  |
| Rabif       | 204478_s_at | 0.0203079   | 271.0481481  | 53.19160844   | 237.1818182 | 43.80661655  |



| Gene symbol | Probeset    | P value     | Mean Control | STDEV Control | Mean Heroin | STDEV Heroin |
|-------------|-------------|-------------|--------------|---------------|-------------|--------------|
| RALBP1      | 202845_s_at | 0.0150958   | 329.5185185  | 115.6133711   | 426.4909091 | 177.3319484  |
| ralgapa1    | 213049_at   | 0.00183843  | 474.9925926  | 143.9981729   | 621.0090909 | 177.445852   |
| ralyl       | 213967_at   | 0.0134953   | 893.4481481  | 159.0486799   | 964.8045455 | 136.7829267  |
| RANBP6      | 213019_at   | 0.00152115  | 397.837037   | 146.705991    | 451.0272727 | 84.56924006  |
| RAP2A       | 221830_at   | 0.0231771   | 1677.62963   | 554.4063178   | 2051.509091 | 501.3869088  |
| RAPGEF2     | 203097_s_at | 0.00689568  | 1554.103704  | 342.8189189   | 1873.904545 | 509.413612   |
| Rarb        | 208412_s_at | 0.00160732  | 7.237037037  | 3.606527005   | 15.38181818 | 10.81505284  |
| RARRES2     | 209496_at   | 0.00918039  | 250.6444444  | 108.0385947   | 179.2772727 | 55.61881261  |
| Rasa1       | 202677_at   | 0.0197041   | 637.4962963  | 147.4285263   | 759.6318182 | 157.0656168  |
| Rasa1       | 210621_s_at | 0.0238995   | 147.1333333  | 50.58068193   | 196.85      | 62.48380171  |
| rasal1      | 219752_at   | 0.0108736   | 465.1037037  | 88.158535     | 370.7772727 | 91.32916882  |
| RASAL2      | 219026_s_at | 0.0293379   | 23.8962963   | 19.58359756   | 45.92727273 | 32.09871948  |
| RASL12      | 219167_at   | 0.00411206  | 243.2        | 88.36584791   | 204.9636364 | 88.08128576  |
| RB1CC1      | 202033_s_at | 0.0324892   | 445.9555556  | 192.8327101   | 689.0454545 | 333.1183655  |
| RBM25       | 212030_at   | 0.00277201  | 163.8148148  | 64.25026611   | 253.1818182 | 112.8871608  |
| RBM25       | 212031_at   | 0.00156671  | 141.2888889  | 46.7970605    | 192.8454545 | 60.90427092  |
| RBM25       | 212033_at   | 0.00095582  | 374.2481481  | 110.4175062   | 600.2045455 | 241.6859995  |
| RBM26       | 220509_at   | 0.00657725  | 44.95925926  | 19.60687201   | 58.50454545 | 24.4505814   |
| Rbm39       | 207941_s_at | 0.0077578   | 1112.355556  | 443.0904443   | 1272.845455 | 376.3587583  |
| rbm42       | 205740_s_at | 0.0142406   | 481.1407407  | 134.0814599   | 367.5363636 | 127.6503951  |
| RBM9        | 216215_s_at | 0.00707015  | 636.537037   | 151.3252334   | 729.5136364 | 139.719291   |
| RBMS2P1     | 34187_at    | 0.00890695  | 29.61111111  | 13.49490882   | 20.11818182 | 11.64656648  |
| RCN2        | 201485_s_at | 0.0100517   | 695.0888889  | 232.7355834   | 1042.654545 | 510.8946874  |
| Rdh8        | 220683_at   | 0.0327587   | 46.06296296  | 35.68280288   | 34.34545455 | 21.32996388  |
| RECK        | 205407_at   | 0.0124753   | 74.23703704  | 25.69892467   | 99.28181818 | 37.55352544  |
| Recql5      | 34063_at    | 0.00391358  | 57.78518519  | 15.78981424   | 46.50909091 | 18.55562831  |
| REEP1       | 204365_s_at | 0.000917884 | 1138.655556  | 209.3804953   | 1331.204545 | 279.9963834  |
| REEP5       | 208873_s_at | 0.00424455  | 2399.688889  | 856.291127    | 2786.35     | 869.3831386  |
| REG1A       | 207778_at   | 0.0287911   | 24.91851852  | 15.89523482   | 24.01363636 | 24.37979834  |
| RELN        | 205923_at   | 0.00443261  | 544.2111111  | 167.5276173   | 681.35      | 211.3082735  |
| REPS2       | 220873_at   | 0.010207    | 57.61111111  | 22.74536865   | 70.38181818 | 32.92864777  |
| RER1        | 202296_s_at | 0.0143803   | 374.5888889  | 112.0514797   | 316.2954545 | 81.05859419  |
| REV3L       | 208070_s_at | 0.0141846   | 195.337037   | 71.8259978    | 273.0454545 | 91.15429477  |
| RFK         | 203224_at   | 0.000443788 | 629.2037037  | 151.7424526   | 828.0272727 | 208.5898143  |
| RFK         | 203225_s_at | 0.0079328   | 399.3        | 109.1301728   | 512.8590909 | 194.4983698  |
| RFPL1S      | 214120_at   | 0.00282872  | 516.6148148  | 174.5324693   | 688.95      | 228.3951354  |
| rfx3        | 217671_at   | 0.0157506   | 156.5555556  | 63.36708885   | 226.1681818 | 73.07081618  |
| RFX7        | 218430_s_at | 0.00862872  | 27.96296296  | 20.40230281   | 44.70909091 | 19.918355    |
| rfxank      | 202758_s_at | 0.00023841  | 237.3851852  | 47.80389994   | 166.4045455 | 60.7860297   |
| Rgl2        | 209110_s_at | 0.0298764   | 471.1666667  | 100.9344685   | 529.8636364 | 134.3967068  |

| Gene symbol | Probeset    | P value     | Mean Control | STDEV Control | Mean Heroin | STDEV Heroin |
|-------------|-------------|-------------|--------------|---------------|-------------|--------------|
| RGPD6       | 212842_x_at | 6.81379E-05 | 825.2222222  | 230.2100301   | 1188.654545 | 276.0842603  |
| RHOD        | 31846_at    | 0.0135841   | 455.8296296  | 80.10484867   | 405.2954545 | 96.74119858  |
| rhoq        | 212120_at   | 0.0228277   | 710.3962963  | 205.7111576   | 886.2727273 | 248.2366731  |
| RHOQP2      | 212119_at   | 0.0114881   | 1388.648148  | 324.8954677   | 1748.709091 | 566.4753447  |
| RHOT1       | 218323_at   | 0.031861    | 570.9407407  | 160.5261715   | 661.9727273 | 218.009334   |
| RING1       | 35685_at    | 0.00275727  | 678.9740741  | 162.8719993   | 579.8863636 | 110.9905457  |
| RNASE1      | 201785_at   | 0.0248208   | 1364.025926  | 660.8083753   | 877.75      | 413.3343219  |
| RNASET2     | 217983_s_at | 0.0274103   | 530.6185185  | 273.5850986   | 396.2136364 | 180.4179072  |
| RNF114      | 200867_at   | 0.00899106  | 228.7481481  | 62.57907841   | 184.0090909 | 44.97477504  |
| RNF126      | 215031_x_at | 0.0197175   | 223.6666667  | 36.07853613   | 187.4       | 52.01621542  |
| RNF138      | 218738_s_at | 0.00991901  | 166.5444444  | 59.43688529   | 222.9090909 | 73.00831596  |
| Rnf144a     | 204040_at   | 0.0139326   | 427.5037037  | 81.45237155   | 514.0727273 | 102.8632202  |
| RNF17       | 221033_s_at | 0.022022    | 43.96296296  | 19.1466034    | 62.68181818 | 38.42908914  |
| Rnf38       | 218528_s_at | 0.0164531   | 378.037037   | 76.25055938   | 474.6954545 | 119.9487687  |
| RNF44       | 203286_at   | 0.00954758  | 349.3925926  | 77.28238393   | 408.9363636 | 81.85281532  |
| Rnf8        | 203161_s_at | 0.0246489   | 8.096296296  | 3.369031073   | 7.572727273 | 2.751481301  |
| rnh1        | 206050_s_at | 0.0329068   | 877.5259259  | 287.326007    | 678.3772727 | 206.4438144  |
| rnmt        | 202683_s_at | 0.0274396   | 361.1814815  | 66.51701365   | 422.4363636 | 88.3105966   |
| RNMTL1      | 218993_at   | 0.00826201  | 285.0259259  | 46.76813998   | 225.0909091 | 57.18763527  |
| RNPEPL1     | 218301_at   | 0.0282808   | 137.2925926  | 44.12853539   | 120.1409091 | 28.52570535  |
| RNU2-2      | 214349_at   | 0.0115461   | 106.1925926  | 35.7079815    | 88.78636364 | 26.95909239  |
| ROCK2       | 202762_at   | 0.000342789 | 289.3481481  | 151.5904588   | 498.4272727 | 181.7459954  |
| ROD1        | 207223_s_at | 0.00603803  | 63.65185185  | 31.02035771   | 101.0818182 | 40.84477744  |
| Rom1        | 205806_at   | 0.0147894   | 110.5851852  | 39.82870731   | 87.85909091 | 37.78361523  |
| RORB        | 206443_at   | 0.00813135  | 16.37407407  | 19.40766289   | 7.540909091 | 3.609730117  |
| rp2         | 205191_at   | 0.0275626   | 18.48518519  | 7.662882753   | 26.53181818 | 9.247310361  |
| RPA1        | 201529_s_at | 0.0151504   | 208.2444444  | 91.30878858   | 178.0954545 | 50.57793117  |
| RPL13AP7    | 200715_x_at | 0.0125292   | 2296.362963  | 696.9838019   | 1796.813636 | 402.4725691  |
| RPL18       | 200022_at   | 0.00196323  | 5200.366667  | 1431.74008    | 4173.463636 | 1236.548971  |
| RPL18AP3    | 200869_at   | 0.0162005   | 4142.248148  | 1972.707039   | 3298.213636 | 1296.991024  |
| RPL35P2     | 200002_at   | 0.0157467   | 5154.622222  | 2227.195561   | 4035.409091 | 1562.976057  |
| rpl36       | 219762_s_at | 0.00970292  | 2573.537037  | 813.5424078   | 1909.85     | 644.4656397  |
| RPL8P2      | 200936_at   | 0.0109946   | 4225.92963   | 1370.24882    | 3326.827273 | 1073.457973  |
| RPN1        | 201011_at   | 0.0265958   | 489.7037037  | 140.6298318   | 403.7818182 | 81.03629778  |
| Rprd1a      | 218209_s_at | 0.0258977   | 212.1296296  | 51.5394458    | 270.4272727 | 91.53312792  |
| rps10       | 200095_x_at | 0.0210782   | 17174.36296  | 4758.118347   | 13735.48182 | 4101.217103  |
| rps21       | 214097_at   | 0.0309413   | 84.32592593  | 62.01174574   | 49.13636364 | 61.81876388  |
| RPS26P8     | 217753_s_at | 0.00824865  | 3114.125926  | 1148.903827   | 2321.404545 | 866.1296777  |
| RPS27AP11   | 217144_at   | 0.0172355   | 746.6407407  | 197.1128772   | 635.9545455 | 132.3408109  |
| RPS28       | 208904_s_at | 0.0166419   | 12200.34074  | 4191.784137   | 9464        | 2881.24645   |

| Gene symbol | Probeset    | P value     | Mean Control | STDEV Control | Mean Heroin | STDEV Heroin |
|-------------|-------------|-------------|--------------|---------------|-------------|--------------|
| RPS3P3      | 208692_at   | 0.0106407   | 6977.666667  | 1984.797032   | 5533.045455 | 1818.965969  |
| RPS6        | 201254_x_at | 0.020224    | 9090.277778  | 1727.311258   | 7747.918182 | 1592.102068  |
| RPS6KA2     | 204906_at   | 0.0266329   | 514.8407407  | 178.7813109   | 411.6454545 | 115.1528952  |
| Rps6ka3     | 203843_at   | 0.0111893   | 136.2814815  | 35.12071531   | 173.0318182 | 43.83365077  |
| RPS6KA5     | 204633_s_at | 0.000209791 | 460.5814815  | 85.17820251   | 597.2090909 | 147.6870079  |
| RPS6P1      | 200081_s_at | 0.00403217  | 5395.062963  | 1239.448367   | 4223.045455 | 1235.883524  |
| RPS9P4      | 214317_x_at | 0.0157474   | 2611.518519  | 1140.413329   | 1869.268182 | 640.9797466  |
| RPS9P4      | 217747_s_at | 0.00386083  | 4354.455556  | 1324.16571    | 3161.172727 | 1285.87279   |
| RRBP1       | 201205_at   | 0.000215844 | 144.6407407  | 38.29679902   | 112.1818182 | 45.01294667  |
| RRP7A       | 202937_x_at | 0.00480403  | 214.4777778  | 94.01459925   | 116.5227273 | 69.69107295  |
| RRP7A       | 33307_at    | 0.0137276   | 222.6296296  | 77.61561508   | 155.7727273 | 36.08921725  |
| RSBN1       | 213694_at   | 0.00660353  | 181.4740741  | 48.07466623   | 246.3681818 | 72.11871421  |
| Rsl1d1      | 212018_s_at | 0.0195146   | 221.3740741  | 55.41866939   | 193.95      | 38.33404244  |
| RSRC2       | 202302_s_at | 0.00499949  | 464.4703704  | 136.4417227   | 621.8363636 | 201.990779   |
| Rtf1        | 212301_at   | 0.000836058 | 384.2259259  | 88.59285261   | 470.1454545 | 80.36653371  |
| RTN1        | 210222_s_at | 0.0199725   | 2403.422222  | 833.612381    | 2845.572727 | 984.6463412  |
| RUFY3       | 203724_s_at | 0.0260296   | 757.1518519  | 232.0158671   | 895.8363636 | 300.4932636  |
| RUNDC3B     | 215321_at   | 0.00249182  | 288.2481481  | 77.49106336   | 395.3454545 | 116.6118785  |
| RUNX1T1     | 205528_s_at | 0.0173214   | 44.05555556  | 17.39233548   | 60.98181818 | 21.41280517  |
| RYBP        | 201845_s_at | 0.0155873   | 421.0851852  | 109.2622382   | 494.3727273 | 113.2803441  |
| RYR2        | 214044_at   | 0.0173287   | 534.6740741  | 208.0859264   | 653.2227273 | 219.9230687  |
| S100A13     | 202598_at   | 0.0190628   | 2067.525926  | 546.1733978   | 1663.259091 | 831.312463   |
| S100P       | 204351_at   | 0.0103179   | 15.46666667  | 9.772488857   | 10.93636364 | 6.674082456  |
| S100PBP     | 218370_s_at | 0.0280178   | 272.4481481  | 91.64583322   | 314.3681818 | 98.54510394  |
| SAC3D1      | 205449_at   | 0.0138128   | 296.9925926  | 93.77965962   | 193.4045455 | 98.7400024   |
| SACS        | 213262_at   | 0.0121442   | 483.6444444  | 206.6398192   | 595.6636364 | 178.0895001  |
| SAE1        | 217946_s_at | 0.0236818   | 627.8740741  | 132.6686114   | 520.6954545 | 131.2837983  |
| Sap30bp     | 217965_s_at | 0.0253945   | 243.0925926  | 49.88241501   | 195.1454545 | 70.13179245  |
| SARS        | 200802_at   | 0.00816424  | 1405.659259  | 429.3924162   | 1115.718182 | 300.4681231  |
| SARS2       | 218702_at   | 0.0274056   | 197.6851852  | 58.70977971   | 162.7727273 | 45.55107214  |
| Satb1       | 203408_s_at | 0.0236996   | 365.7740741  | 102.9430634   | 467.2681818 | 133.040815   |
| SC5DL       | 211423_s_at | 0.0175676   | 591.862963   | 183.7174799   | 743.0454545 | 192.7382897  |
| SCAMP1      | 212416_at   | 0.000321787 | 1366.340741  | 233.1046963   | 1634.022727 | 253.6876293  |
| SCAMP1      | 212425_at   | 4.68022E-05 | 350.7148148  | 93.60697584   | 495.9954545 | 109.3925369  |
| Scand1      | 218206_x_at | 0.000614165 | 1005.988889  | 319.2696333   | 656.6681818 | 211.0744766  |
| SCARB1      | 215834_x_at | 0.0246025   | 15.58148148  | 15.18425391   | 11.03181818 | 3.84563901   |
| Scin        | 222272_x_at | 0.0316085   | 74.47777778  | 32.11429508   | 90.85454545 | 48.93419028  |
| SCLY        | 219808_at   | 0.00285272  | 52.22592593  | 37.877247     | 79.60454545 | 46.13092628  |
| Scn1a       | 210383_at   | 0.0215057   | 136.0444444  | 43.88661381   | 175.7181818 | 66.06848277  |
| SCN3A       | 210432_s_at | 0.000245903 | 537.6333333  | 266.9810437   | 943.3       | 361.8074824  |

| Gene symbol | Probeset    | P value     | Mean Control | STDEV Control | Mean Heroin | STDEV Heroin |
|-------------|-------------|-------------|--------------|---------------|-------------|--------------|
| SCN8A       | 207049_at   | 0.0193034   | 12.21111111  | 14.55808877   | 28.69090909 | 25.20362614  |
| SCP2        | 201339_s_at | 0.0273783   | 220.3222222  | 77.22002198   | 302.0181818 | 112.1406627  |
| Sdc4        | 202071_at   | 0.000853829 | 1126.607407  | 398.577895    | 865.7863636 | 288.7584298  |
| sdcbp       | 200958_s_at | 0.0105509   | 1846.544444  | 518.4553592   | 2209.977273 | 593.1532773  |
| SDF2L1      | 218681_s_at | 0.0233317   | 296.0185185  | 71.3939506    | 229.1590909 | 92.89458777  |
| SDHA        | 201093_x_at | 0.0293508   | 567.1962963  | 113.3149643   | 475.3318182 | 111.3240888  |
| sdhC        | 202004_x_at | 0.0165276   | 661.8592593  | 183.9215055   | 555.4       | 137.6817241  |
| sdhC        | 210131_x_at | 0.00678954  | 700.537037   | 172.2874413   | 582.7045455 | 123.0757586  |
| sec13       | 207707_s_at | 0.0250176   | 666.4333333  | 113.7021311   | 547.1681818 | 128.7354259  |
| Sec14I2     | 204541_at   | 0.0328478   | 124.9740741  | 28.86650431   | 116.7409091 | 35.80544863  |
| SEC61A1     | 217716_s_at | 0.0064299   | 263.9444444  | 77.38111146   | 212.0954545 | 87.86994978  |
| SEC63       | 201916_s_at | 0.00722181  | 387.5        | 113.8924594   | 486.3409091 | 124.4711313  |
| Sel1I3      | 212314_at   | 0.0126881   | 165.1592593  | 55.05994816   | 223.25      | 80.76188841  |
| SELENBP1    | 214433_s_at | 0.00446295  | 372.7037037  | 90.02725861   | 295.9909091 | 128.9653402  |
| SEMA5A      | 213169_at   | 0.0263175   | 218.9518519  | 37.180075     | 263.15      | 55.58296887  |
| SEMA6A      | 220454_s_at | 0.0298017   | 126.6555556  | 31.34605034   | 163.5954545 | 74.9627811   |
| SENP6       | 202318_s_at | 0.0163306   | 221.4777778  | 59.12328276   | 270.0409091 | 62.34995444  |
| SEPHS2      | 200961_at   | 0.0308394   | 368.4851852  | 92.47382459   | 412.3727273 | 116.2891641  |
| SEPX1       | 217977_at   | 0.00323968  | 315.3814815  | 145.1114321   | 203.6818182 | 97.94113702  |
| serbp1      | 217724_at   | 0.00644094  | 1141.785185  | 290.7835578   | 1360.477273 | 272.280587   |
| SERF2       | 217756_x_at | 0.0172168   | 1804.707407  | 636.6013763   | 1419.336364 | 466.5875956  |
| SERINC1     | 208671_at   | 0.0168222   | 1446.396296  | 468.131711    | 1772.359091 | 565.153335   |
| SERINC3     | 221472_at   | 0.0137837   | 478.1555556  | 121.5962592   | 551.7181818 | 90.39447221  |
| SERINC3     | 221473_x_at | 0.0244212   | 1260.425926  | 343.1861175   | 1477.390909 | 428.8321027  |
| Serpinf1    | 202283_at   | 0.00350761  | 42.44444444  | 32.68090872   | 22.36363636 | 10.37430642  |
| SERPING1    | 200986_at   | 0.00161896  | 169.0555556  | 56.24383955   | 138.65      | 46.02753575  |
| Serpini1    | 205352_at   | 0.00895311  | 1604.514815  | 451.8308054   | 1920.754545 | 578.3287134  |
| set         | 200631_s_at | 0.000191426 | 1366.077778  | 337.389034    | 1606.890909 | 350.7988433  |
| set         | 40189_at    | 0.0122363   | 921.4        | 251.1447529   | 1028.859091 | 266.3466639  |
| set         | 210231_x_at | 0.024969    | 1176.933333  | 294.4548744   | 1229.081818 | 202.1000168  |
| SETBP1      | 205933_at   | 0.000340794 | 121.162963   | 29.72235818   | 157.15      | 28.54906804  |
| SETD2       | 215038_s_at | 0.0282261   | 105.4444444  | 23.3432305    | 130.6227273 | 33.56730172  |
| SETD4       | 219482_at   | 0.0131712   | 62.23703704  | 49.7799245    | 92.47272727 | 48.97962824  |
| Setx        | 201964_at   | 0.00352178  | 223.6259259  | 76.88027952   | 300.5045455 | 77.88333447  |
| SEZ6L       | 207873_x_at | 0.0120579   | 88.64444444  | 33.28588675   | 67.51818182 | 32.26127911  |
| sf3a3       | 203818_s_at | 0.0194158   | 308.1592593  | 45.37648713   | 275.4954545 | 43.0340339   |
| SF4         | 215004_s_at | 8.48806E-05 | 210.4333333  | 40.76687947   | 149.8727273 | 41.06457379  |
| SFN         | 33322_i_at  | 0.00998172  | 843.6185185  | 324.2667777   | 617.7227273 | 134.5716978  |
| SFN         | 33323_r_at  | 0.0155969   | 526.2037037  | 206.5302632   | 395.3772727 | 93.89380492  |
| SFRP5       | 207468_s_at | 0.00729302  | 24.84814815  | 20.62029192   | 15.16363636 | 8.44492214   |

| Gene symbol | Probeset    | P value     | Mean Control | STDEV Control | Mean Heroin | STDEV Heroin |
|-------------|-------------|-------------|--------------|---------------|-------------|--------------|
| SFRS1       | 201741_x_at | 0.0020392   | 57.8         | 24.99206028   | 82.11363636 | 39.00428909  |
| SFRS13A     | 206095_s_at | 0.00892465  | 94.44444444  | 27.92987556   | 122.2954545 | 36.22407089  |
| sfrs18      | 212179_at   | 0.000835144 | 753.6407407  | 257.697584    | 1016.495455 | 257.3536579  |
| SFTPC       | 38691_s_at  | 0.00920753  | 363.3037037  | 115.8335858   | 281.0590909 | 101.2642261  |
| SFTPC       | 205982_x_at | 0.0319383   | 14.72962963  | 4.358176649   | 12.55454545 | 3.950976645  |
| SGCD        | 213543_at   | 0.00585387  | 31.8037037   | 22.49703368   | 53.29545455 | 24.90476101  |
| SGK1        | 201739_at   | 0.0302761   | 835.0148148  | 392.9824059   | 666.8681818 | 182.337237   |
| SGSM3       | 214779_s_at | 0.0265607   | 235.9074074  | 84.09502375   | 189.8136364 | 66.02894961  |
| Sgta        | 201396_s_at | 0.0061774   | 312.0407407  | 109.4393694   | 240.0045455 | 80.98376367  |
| SH2B1       | 40149_at    | 0.00876826  | 212.2703704  | 43.16227711   | 198.4681818 | 26.9278646   |
| SH2D4A      | 219749_at   | 0.0176875   | 89.22592593  | 29.91491257   | 109.9454545 | 52.95601704  |
| SH3BP5      | 201811_x_at | 0.0283071   | 909.6296296  | 222.7610393   | 966.8727273 | 194.8999748  |
| sh3glb1     | 209090_s_at | 0.00201502  | 410.0148148  | 114.6848682   | 611.1863636 | 188.529574   |
| sh3yl1      | 204019_s_at | 0.00154293  | 417.8222222  | 140.2282709   | 604.0954545 | 204.6832128  |
| SHANK2      | 213308_at   | 0.00976543  | 365.1259259  | 117.9688733   | 552.2090909 | 206.190321   |
| SHC3        | 206330_s_at | 0.010979    | 363.3703704  | 166.7982425   | 558.7909091 | 178.3438143  |
| SHISA6      | 217479_at   | 0.0297249   | 35.9962963   | 26.53851311   | 22.9        | 19.24330434  |
| SHMT1       | 209980_s_at | 0.0319325   | 24.94074074  | 12.99764059   | 19.62272727 | 9.424129709  |
| SHMT1       | 217304_at   | 0.0224085   | 65.93703704  | 30.0560649    | 54.95       | 14.71609906  |
| SHOC2       | 202777_at   | 0.00455213  | 424.5740741  | 81.43641499   | 523.85      | 106.2994277  |
| SIDT1       | 219734_at   | 0.0115626   | 41.25925926  | 30.92288497   | 58.99090909 | 18.69593562  |
| SILV        | 209848_s_at | 0.026029    | 140.3703704  | 60.19052963   | 164.1136364 | 53.91709063  |
| Sipa1       | 204164_at   | 0.0152315   | 66.02222222  | 29.88666198   | 46.85       | 34.2614562   |
| SIPA1L1     | 202254_at   | 0.00424757  | 829.937037   | 244.6027048   | 1043.740909 | 200.0097704  |
| SIVA1       | 210792_x_at | 0.0125379   | 229.2962963  | 62.65560618   | 182.4772727 | 76.01375146  |
| Six2        | 206510_at   | 0.00787987  | 53.29259259  | 21.91860688   | 72.71818182 | 23.96367561  |
| SLA         | 203760_s_at | 0.00718606  | 153.7481481  | 69.43042655   | 111.3227273 | 49.61884177  |
| SLAMF7      | 219159_s_at | 0.0097542   | 21.64814815  | 11.65294187   | 37.81363636 | 30.32516314  |
| Slc12a4     | 209402_s_at | 0.0101892   | 72.64444444  | 40.29712085   | 45.01363636 | 24.74837744  |
| Slc13a3     | 205244_s_at | 0.0232926   | 15.53333333  | 9.783384659   | 11.01818182 | 4.099202752  |
| SLC16A5     | 206600_s_at | 0.0280932   | 44.2         | 26.75479828   | 24.53636364 | 18.54237221  |
| SLC18A2     | 213549_at   | 0.0243847   | 188.2333333  | 66.29573603   | 235.7363636 | 71.01615206  |
| SLC1A1      | 213664_at   | 0.0084949   | 469.1185185  | 134.593765    | 582.0636364 | 164.1256677  |
| slc1a4      | 209610_s_at | 0.0257039   | 978.1407407  | 434.6271242   | 869.9727273 | 213.7908038  |
| SLC22A7     | 221662_s_at | 0.017406    | 47.48148148  | 27.31459228   | 33.74090909 | 22.45466669  |
| SLC24A3     | 219090_at   | 0.0284214   | 613.5888889  | 125.8826723   | 655.2727273 | 126.2191827  |
| SLC24A6     | 218749_s_at | 0.0193975   | 104.7148148  | 38.54703125   | 74.92272727 | 52.1006803   |
| slc25a10    | 218275_at   | 0.00188337  | 58.78888889  | 30.96535699   | 41.10454545 | 23.64816468  |
| Slc25a11    | 207088_s_at | 0.0186178   | 402.9888889  | 167.6324077   | 335.5772727 | 107.9260723  |
| Slc25a11    | 209003_at   | 0.02084     | 870.5037037  | 213.6418201   | 682.6227273 | 230.3825492  |

| Gene symbol | Probeset    | P value     | Mean Control | STDEV Control | Mean Heroin | STDEV Heroin |
|-------------|-------------|-------------|--------------|---------------|-------------|--------------|
| SLC25A23    | 220182_at   | 0.0235581   | 199.7555556  | 130.1514305   | 285.7454545 | 141.5538758  |
| SLC25A36    | 201919_at   | 0.00563125  | 675.8444444  | 84.74454071   | 814.6727273 | 162.8842715  |
| SLC25A6     | 212085_at   | 0.00656931  | 2100.540741  | 801.2693657   | 1718.336364 | 518.5902682  |
| Slc29a3     | 219344_at   | 0.015054    | 167.0888889  | 57.74234104   | 141.6045455 | 60.35941933  |
| SLC2A3P1    | 221751_at   | 0.000920538 | 318.0888889  | 100.7125969   | 527.3772727 | 220.7364102  |
| SLC30A9     | 202614_at   | 0.00590046  | 644.9888889  | 194.9546246   | 799.3954545 | 284.3362387  |
| SLC35A1     | 203306_s_at | 0.00643386  | 257.3        | 60.17818414   | 337.2818182 | 99.66063194  |
| SLC38A6     | 214830_at   | 0.0301941   | 70.54074074  | 19.35155051   | 92.62272727 | 29.26366074  |
| SLC39A6     | 202088_at   | 0.0143281   | 697.1518519  | 297.9518848   | 821.8409091 | 258.7985881  |
| SLC48A1     | 48106_at    | 0.024719    | 695.237037   | 206.1407308   | 558.7363636 | 142.6981848  |
| SLC5A3      | 212944_at   | 0.00288376  | 449.7296296  | 136.5649573   | 635.45      | 186.7991454  |
| slc5a6      | 204087_s_at | 0.0215306   | 227.1592593  | 62.31256361   | 192.6954545 | 56.98956026  |
| SLC6A1      | 205152_at   | 0.00968363  | 789.9185185  | 236.4542012   | 1014.790909 | 307.5538418  |
| SLC6A8      | 210854_x_at | 0.0181069   | 211.2888889  | 53.12767882   | 193.1090909 | 62.76692266  |
| SLC7A11     | 207528_s_at | 0.00608856  | 60.06666667  | 23.30414291   | 84.83181818 | 37.28826429  |
| SLC7A11     | 209921_at   | 0.00835279  | 335.1407407  | 113.3587235   | 464.8409091 | 181.558847   |
| SLCO2B1     | 211557_x_at | 0.00937296  | 52.6         | 32.96843479   | 31.46363636 | 12.37957402  |
| SLFN12      | 219885_at   | 0.0184714   | 27.27407407  | 25.45772654   | 17.35       | 12.48624958  |
| Slit2       | 209897_s_at | 0.0252294   | 362.6740741  | 80.22567013   | 402.5590909 | 83.47473333  |
| SLIT3       | 203813_s_at | 0.0276221   | 44.94444444  | 24.66584891   | 55.29090909 | 32.4117984   |
| SLITRK5     | 214930_at   | 0.0335575   | 375.1037037  | 128.3300747   | 435.9318182 | 138.8053601  |
| SLK         | 206875_s_at | 0.0304716   | 170.3851852  | 66.23012737   | 217.6590909 | 75.64408301  |
| SMARCA1     | 203874_s_at | 0.00172156  | 236.1777778  | 66.56210133   | 338.4363636 | 98.10911101  |
| SMARCAL1    | 218452_at   | 0.0268626   | 136.1        | 53.52470314   | 96.54545455 | 32.38245744  |
| smarcd2     | 201827_at   | 0.0142955   | 119.7888889  | 65.36605408   | 78.65454545 | 32.51244051  |
| Smarce1     | 214871_x_at | 0.0301825   | 63.61111111  | 26.81730689   | 47.02272727 | 19.60048425  |
| SMC2        | 204240_s_at | 0.0184136   | 35.64814815  | 24.24889165   | 63.71818182 | 44.38002164  |
| smc3        | 209257_s_at | 0.0159244   | 114.337037   | 52.4851052    | 164.55      | 65.02388389  |
| smc3        | 209259_s_at | 0.011029    | 128.1592593  | 45.69951405   | 170.8818182 | 48.34005178  |
| SMCHD1      | 212579_at   | 0.00104033  | 97.15185185  | 26.69326291   | 139.9       | 36.64517119  |
| smg5        | 212147_at   | 0.00296793  | 162.9703704  | 73.0419522    | 96.08636364 | 50.12802937  |
| SMURF2      | 205596_s_at | 0.0286433   | 349.9222222  | 99.76828282   | 459         | 129.8998479  |
| SMYD2       | 212922_s_at | 0.0272316   | 179.6444444  | 45.54546615   | 170.4045455 | 36.88055982  |
| SNAP91      | 204953_at   | 0.0260166   | 780.9259259  | 225.7508831   | 839.5045455 | 288.8395344  |
| Snapc5      | 213203_at   | 6.94876E-05 | 609.7555556  | 179.9586498   | 719.3909091 | 120.9600836  |
| Snca        | 204467_s_at | 0.00339277  | 825.0703704  | 232.7009997   | 1020.077273 | 311.2142501  |
| snf8        | 218391_at   | 0.0179255   | 582.8148148  | 109.3283611   | 483.9636364 | 110.7080483  |
| SNIP1       | 219409_at   | 0.0258706   | 107.9333333  | 26.15905491   | 85.78636364 | 27.85739699  |
| SNN         | 218032_at   | 0.0301682   | 1886.248148  | 547.9758609   | 2398.259091 | 910.6924831  |
| SNORA21     | 215224_at   | 0.0269703   | 34.25925926  | 27.82977458   | 21.56818182 | 17.60661094  |

| Gene symbol | Probeset    | P value     | Mean Control | STDEV Control | Mean Heroin | STDEV Heroin |
|-------------|-------------|-------------|--------------|---------------|-------------|--------------|
| SNORA25     | 221580_s_at | 0.00523182  | 315.6222222  | 106.6645617   | 397.2272727 | 96.83555123  |
| SNORA67     | 211787_s_at | 0.0145182   | 1391.092593  | 299.6787163   | 1110.209091 | 289.6382701  |
| Snrk        | 209481_at   | 0.0172163   | 454.162963   | 110.2916558   | 566.9909091 | 137.5301868  |
| SNRNP25     | 218493_at   | 0.0236596   | 879.5962963  | 443.8230265   | 623.5636364 | 195.9577543  |
| SNRNP27     | 212440_at   | 0.0177844   | 524.437037   | 121.5219991   | 645.6590909 | 139.8058131  |
| snrnp35     | 205300_s_at | 0.00581694  | 162.6814815  | 52.52603777   | 114.0545455 | 50.09760689  |
| SNRPB       | 213175_s_at | 0.00675977  | 386.3851852  | 158.4571811   | 309.2909091 | 72.55976131  |
| snta1       | 203516_at   | 0.0326674   | 847.837037   | 262.3255422   | 752.0045455 | 301.0642891  |
| Snx11       | 53912_at    | 0.000432617 | 611.3851852  | 240.7712667   | 364.3409091 | 142.2732169  |
| snx17       | 200991_s_at | 0.00573955  | 282.9333333  | 196.5281757   | 161.6909091 | 100.631534   |
| SNX27       | 221006_s_at | 0.00119448  | 409.7296296  | 78.88469099   | 540.0954545 | 164.1766977  |
| snx3        | 200067_x_at | 0.0320088   | 2276.733333  | 748.8612606   | 2745.831818 | 735.0123338  |
| SNX9        | 215284_at   | 0.0110505   | 65.55925926  | 22.73171724   | 91.04090909 | 43.16050508  |
| SOCS6       | 206020_at   | 0.0244783   | 55.78518519  | 24.98654567   | 43.2        | 21.88036737  |
| SOHLH2      | 220129_at   | 0.0260593   | 73.48518519  | 48.02705731   | 105.6136364 | 54.70201786  |
| SORCS3      | 215522_at   | 0.024942    | 205.4444444  | 60.59247436   | 251.9681818 | 75.88833517  |
| Sort1       | 212797_at   | 0.00697636  | 32.43333333  | 19.35430781   | 18.55       | 22.17340213  |
| Sort1       | 212807_s_at | 0.0049044   | 340.0888889  | 143.4278332   | 228.9363636 | 74.49280276  |
| SOS1        | 212780_at   | 0.0056931   | 138.2148148  | 48.828087     | 178.8454545 | 57.86930865  |
| SOX5        | 216561_x_at | 0.0289194   | 57.58518519  | 20.8775865    | 46.66363636 | 22.05878608  |
| sp1         | 214732_at   | 0.0300482   | 19.73703704  | 12.97607705   | 28.28181818 | 19.94011598  |
| SP110       | 208012_x_at | 0.00647725  | 193.9111111  | 64.81101125   | 153.75      | 35.35889125  |
| SP110       | 208392_x_at | 0.0123237   | 15.45185185  | 17.38092169   | 9.254545455 | 5.204734774  |
| SP110       | 209762_x_at | 0.00252234  | 182.2777778  | 45.33092282   | 147.9636364 | 29.68359408  |
| SP3         | 213168_at   | 0.00115582  | 325.662963   | 82.65240072   | 433.6590909 | 88.67532356  |
| SPATA2      | 204434_at   | 0.00478097  | 437.0185185  | 62.92378196   | 502.8590909 | 72.9610115   |
| Spats2      | 218324_s_at | 0.00766788  | 132.1592593  | 34.4913619    | 164.7272727 | 43.85289459  |
| Spats2l     | 222154_s_at | 0.0114546   | 673.5592593  | 138.0405884   | 789.8727273 | 129.9736207  |
| SPG11       | 203513_at   | 0.0322148   | 310.1407407  | 72.49313102   | 377.9090909 | 85.55444888  |
| SPG7        | 214494_s_at | 0.0263509   | 539.3703704  | 126.2992838   | 431.7954545 | 110.9957163  |
| SPRED2      | 212458_at   | 0.0298861   | 150.6444444  | 49.43353217   | 209.6136364 | 72.88317655  |
| Sptlc2      | 203127_s_at | 0.0289528   | 207.0074074  | 42.47248816   | 180.3       | 58.53943726  |
| sqIE        | 209218_at   | 0.00921353  | 281.262963   | 70.46006042   | 332.9318182 | 98.06905432  |
| SR140       | 212060_at   | 0.0121915   | 91.5         | 27.25195829   | 116.4909091 | 41.65002611  |
| srd5a1      | 204675_at   | 0.00634638  | 275.8666667  | 93.25292736   | 301.5090909 | 77.98501632  |
| srd5a1      | 211056_s_at | 0.00144165  | 88.36666667  | 53.93115982   | 134.2272727 | 64.44761758  |
| srp54       | 203605_at   | 0.0310048   | 250.5222222  | 59.02194724   | 288.5181818 | 72.75361314  |
| SRPX2       | 216465_at   | 0.00973723  | 31.62592593  | 26.90805702   | 19.40454545 | 12.27973465  |
| SS18L1      | 213140_s_at | 0.00343911  | 221.837037   | 71.14737764   | 287.5590909 | 62.33855842  |
| SSH1        | 221752_at   | 0.0256584   | 227.037037   | 53.30548498   | 275.5318182 | 42.98188308  |

| Gene symbol | Probeset    | P value     | Mean Control | STDEV Control | Mean Heroin | STDEV Heroin |
|-------------|-------------|-------------|--------------|---------------|-------------|--------------|
| Ssh3        | 219241_x_at | 0.0306886   | 157.4111111  | 29.46022525   | 131.8272727 | 45.33787633  |
| SSNA1       | 210378_s_at | 0.00608688  | 346.4222222  | 73.99398278   | 277.2454545 | 55.72912146  |
| Sstr2       | 217455_s_at | 0.0283378   | 105.1444444  | 48.50031985   | 137.4818182 | 52.02486252  |
| SSX2IP      | 203016_s_at | 0.0159346   | 286.2407407  | 88.66730062   | 409.3090909 | 165.5310931  |
| SSX2IP      | 210871_x_at | 0.00352256  | 655.837037   | 173.679174    | 810.5090909 | 205.0542388  |
| ST3GAL2     | 217650_x_at | 0.0307694   | 135.2185185  | 59.47402172   | 172.4772727 | 71.12312551  |
| st3gal5     | 216075_at   | 0.00235624  | 45.4962963   | 31.16021232   | 31.3        | 24.8219373   |
| ST3GAL6     | 210942_s_at | 0.0119542   | 40.21111111  | 27.63117433   | 58.02272727 | 27.75014254  |
| ST6GALNAC5  | 220979_s_at | 0.0214288   | 417.2185185  | 130.5087266   | 551.2045455 | 161.2663295  |
| STAG2       | 209022_at   | 0.0291132   | 412.1259259  | 146.5729107   | 567.1181818 | 184.0333656  |
| STAG3L3     | 209971_x_at | 0.00938996  | 520.137037   | 79.87077615   | 430.2409091 | 78.2101909   |
| Stat3       | 208991_at   | 0.0141012   | 304.9296296  | 108.1206976   | 273.2636364 | 114.1923004  |
| stip1       | 213330_s_at | 0.0328198   | 261.0814815  | 108.1249955   | 229.8863636 | 67.87772827  |
| stk19       | 204090_at   | 0.000836658 | 185.5074074  | 85.3360458    | 94.36363636 | 57.28873026  |
| stk19       | 36019_at    | 0.0155587   | 402.3962963  | 69.14446683   | 345.7181818 | 100.128335   |
| stt3a       | 202223_at   | 0.0138259   | 170.1777778  | 37.57022484   | 149.7045455 | 36.53382617  |
| STUB1       | 217934_x_at | 0.0054288   | 2259.574074  | 485.7299476   | 1710.590909 | 443.6795292  |
| STX12       | 212111_at   | 0.00336787  | 939.9740741  | 273.8102327   | 741.5       | 160.1813318  |
| STX4        | 203530_s_at | 0.0333345   | 299.4481481  | 59.7389151    | 244.5363636 | 73.27785052  |
| STX5        | 203330_s_at | 0.0187008   | 147.4814815  | 31.10060644   | 124.0181818 | 48.16535641  |
| STX6        | 212799_at   | 9.12208E-05 | 567.5407407  | 107.0382148   | 660.4227273 | 79.14918964  |
| STX7        | 212632_at   | 0.027454    | 525.0074074  | 121.0883369   | 617.0363636 | 148.1573538  |
| Stx8        | 204690_at   | 0.0248143   | 672.5333333  | 254.7269503   | 513.6545455 | 122.7025429  |
| sub1        | 221727_at   | 0.0334436   | 815.3037037  | 302.1924164   | 994.3636364 | 318.5329848  |
| SUCLA2      | 202930_s_at | 0.00929265  | 407.3481481  | 103.3932908   | 475.8454545 | 138.1164441  |
| Sumo1       | 211069_s_at | 0.00660791  | 975.6148148  | 327.469559    | 1099.631818 | 263.6162929  |
| supt5h      | 201480_s_at | 0.0215248   | 643.9259259  | 130.8494425   | 557.8363636 | 111.0754164  |
| SURF1       | 204295_at   | 0.032555    | 1342.111111  | 259.5652924   | 1078.577273 | 331.0203791  |
| Suv39h1     | 218619_s_at | 0.0299124   | 180.9851852  | 54.62985028   | 135.4636364 | 46.76583557  |
| suv420h1    | 218242_s_at | 0.023489    | 325.2481481  | 137.8020553   | 423.1681818 | 122.4107309  |
| SUZ12       | 212287_at   | 0.0136287   | 324.7851852  | 108.1745978   | 399.0409091 | 106.7865189  |
| SYDE1       | 44702_at    | 0.0109492   | 215.8111111  | 71.40380475   | 179.9954545 | 31.39993141  |
| SYMPK       | 202339_at   | 0.00327042  | 167.437037   | 52.37847582   | 120.4454545 | 46.95459537  |
| SYMPK       | 32402_s_at  | 0.00587749  | 232.0703704  | 71.95190602   | 166.3545455 | 62.65373266  |
| SYNCRIP     | 217833_at   | 0.00238022  | 362.2111111  | 73.411445     | 446.8       | 77.01801892  |
| SYNPO2L     | 219804_at   | 0.0130976   | 12.16296296  | 10.97616818   | 21.29090909 | 12.97539463  |
| Syt1        | 203998_s_at | 0.000831259 | 421.6407407  | 212.0299494   | 629.05      | 286.6518857  |
| Syt1        | 203999_at   | 0.000496838 | 2661.822222  | 803.1452658   | 3695.681818 | 1037.786844  |
| Taf5        | 210053_at   | 0.0301699   | 113.9740741  | 51.92546872   | 136.5090909 | 36.59610842  |
| TANC2       | 208425_s_at | 0.0272297   | 72.55925926  | 53.06374439   | 120.0181818 | 71.7010436   |



| Gene symbol | Probeset              | P value     | Mean Control | STDEV Control | Mean Heroin | STDEV Heroin |
|-------------|-----------------------|-------------|--------------|---------------|-------------|--------------|
| taok2       | 204877_s_at           | 0.0225974   | 76.95555556  | 26.0477274    | 59.42727273 | 28.06820234  |
| TAPBPL      | 218747_s_at           | 0.024048    | 50.22592593  | 21.83537343   | 37.31818182 | 21.23107867  |
| TARBP1      | 202813_at             | 0.00165847  | 199.0259259  | 88.86767861   | 311.2181818 | 111.9472352  |
| TARBP2      | 203677_s_at           | 0.0132493   | 187.1666667  | 45.48621938   | 153.7227273 | 54.58854696  |
| TARDBP      | 221264_s_at           | 0.000902386 | 296.5481481  | 93.14714319   | 379.5818182 | 69.55184867  |
| tardbp1     | 216420_at             | 0.0221385   | 33.27037037  | 23.78580402   | 24.44090909 | 15.34556424  |
| TAX1BP3     | 209154_at             | 0.0301711   | 580.2481481  | 225.7735291   | 432.2954545 | 128.34003    |
| TBC1D5      | 201814_at             | 0.0158395   | 647.662963   | 194.6431096   | 747.0909091 | 179.4602912  |
| TBC1D9      | 212956_at             | 0.00988025  | 475.9851852  | 152.3948684   | 619.8727273 | 222.9381874  |
| TBCB        | 201804_x_at           | 0.0306463   | 1969.233333  | 541.1015794   | 1688.677273 | 447.5336667  |
| TBCCD1      | 206451_at             | 0.0241032   | 62.40740741  | 17.46345472   | 49.89545455 | 15.05451925  |
| tbcel       | 222365_at             | 0.0330744   | 71.86666667  | 31.32712022   | 84.34090909 | 25.76619526  |
| Tbk1        | 218520_at             | 0.00766669  | 197.3962963  | 40.23062822   | 238.9090909 | 44.46203205  |
| TCEA1       | 216241_s_at           | 0.00446744  | 608.6333333  | 218.145747    | 860.0045455 | 290.9756568  |
| Tceb2       | 200085_s_at           | 0.0297175   | 3945.451852  | 1130.648613   | 2972.813636 | 1245.523046  |
| tcerg1      | 202396_at             | 0.000163057 | 291.3111111  | 78.16289368   | 418.7045455 | 145.2475112  |
| TCF25       | 213311_s_at           | 0.00766144  | 1272.181481  | 461.2164385   | 870.5454545 | 337.2090488  |
| TCF4        | 212385_at             | 0.00545579  | 108.4148148  | 53.01902927   | 166.1045455 | 61.412768    |
| TCF4        | 212387_at             | 0.032169    | 408.4333333  | 150.4259772   | 490.9363636 | 125.14527    |
| TCL6        | 221054_s_at           | 0.018116    | 4.014814815  | 3.649837057   | 2.745454545 | 1.065353629  |
| TCN2        | 204043_at             | 0.00531073  | 207.1777778  | 45.80899587   | 172.3227273 | 52.47287673  |
| TECPR2      | 204308_s_at           | 0.0236405   | 485.7296296  | 112.3099277   | 441.2909091 | 52.13247694  |
| Tecr        | 208336_s_at           | 0.00208502  | 922.1666667  | 258.8073013   | 694.7363636 | 182.3758065  |
| TEK         | 206702_at             | 0.00861833  | 230.5777778  | 51.56736694   | 272.9272727 | 76.52980858  |
| Terf2ip     | 201174_s_at           | 0.029403    | 2091.196296  | 467.5180223   | 2251.927273 | 586.247597   |
| TESC        | 218872_at             | 0.00115176  | 750.6481481  | 230.1123427   | 508.2227273 | 122.0745983  |
| Tex264      | 218548_x_at           | 0.0243993   | 188.1185185  | 46.20283905   | 148.6545455 | 47.01272095  |
| TFAP2A      | 204654_s_at           | 0.0160396   | 27.14074074  | 18.82470266   | 16.06818182 | 12.94108946  |
| TFEB        | 221866_at             | 0.0193291   | 170.962963   | 101.3760105   | 110.8772727 | 61.58302898  |
| TFPT        | 218996_at             | 0.00958571  | 439.1407407  | 125.609524    | 316.5363636 | 95.31967541  |
| TGFB2       | 220406_at             | 0.0257858   | 55.32962963  | 22.77722909   | 48.56363636 | 15.71897687  |
| tgm2        | 211003_x_at           | 0.00902257  | 10.48888889  | 6.393947459   | 8.318181818 | 4.205737166  |
| THAP7       | 218492_s_at           | 0.000134013 | 368.3296296  | 79.62698042   | 276.5272727 | 70.55015225  |
| Thoc5       | 209418_s_at           | 0.00103453  | 163.9037037  | 44.30958814   | 115.8136364 | 40.50358356  |
| THOC6       | 218848_at             | 0.00601653  | 58.13703704  | 29.89618123   | 40.14545455 | 27.26144543  |
| thrA        | 214883_at             | 0.0316864   | 37.02962963  | 27.83490911   | 22.85454545 | 18.30635402  |
| thrB        | AFFX-r2-Bs-thr-M_s_at | 0.0334729   | 24.59259259  | 16.38808024   | 42.74090909 | 30.85889019  |
| THSD7A      | 213894_at             | 0.000503873 | 133.8222222  | 44.1778428    | 220.1863636 | 86.27337114  |
| THSD7A      | 214920_at             | 0.00679477  | 217.262963   | 121.5727675   | 291.2318182 | 101.036134   |
| Thtpa       | 214341_at             | 0.0223473   | 17.21851852  | 15.14679547   | 9.240909091 | 4.221448532  |

| Gene symbol | Probeset    | P value     | Mean Control | STDEV Control | Mean Heroin | STDEV Heroin |
|-------------|-------------|-------------|--------------|---------------|-------------|--------------|
| Tia1        | 201448_at   | 0.0293655   | 197.1555556  | 62.99907407   | 250.3863636 | 91.86499046  |
| Tia1        | 201450_s_at | 0.025008    | 59.76296296  | 29.90931355   | 82.58181818 | 30.66571898  |
| tiam1       | 213135_at   | 0.00127537  | 1328.459259  | 264.1897064   | 1596.977273 | 248.9540901  |
| TIMM8B      | 218357_s_at | 0.025885    | 1753.7       | 411.0389173   | 1421.927273 | 395.0783155  |
| timp2       | 203167_at   | 0.00804426  | 78.6037037   | 48.28683115   | 39.07727273 | 24.86879728  |
| tjp3        | 213412_at   | 0.0168323   | 5.840740741  | 2.883542061   | 6.586363636 | 2.319543357  |
| tjp3        | 35148_at    | 0.00939516  | 16.03703704  | 13.1719734    | 11.95909091 | 9.426844096  |
| tkt         | 208700_s_at | 0.00639801  | 716.9481481  | 171.1281984   | 541.3954545 | 158.9258092  |
| TLE3        | 212770_at   | 0.00446909  | 129.3666667  | 51.05231856   | 102.1636364 | 44.37538513  |
| Tlk1        | 202606_s_at | 0.00131336  | 329.3074074  | 103.0569892   | 475.2545455 | 142.3301117  |
| TLL2        | 215008_at   | 0.0185792   | 72.21111111  | 35.59233208   | 93.40454545 | 40.56883013  |
| TLN2        | 212701_at   | 0.00965175  | 381.7444444  | 119.1775674   | 495.4227273 | 133.6424367  |
| tm2d3       | 221702_s_at | 0.0204884   | 1285.714815  | 221.7147539   | 1348.363636 | 314.5282084  |
| TM9SF3      | 217758_s_at | 3.75087E-05 | 351.5555556  | 109.7138668   | 450.5727273 | 103.1120573  |
| TMBIM1      | 217730_at   | 0.000660687 | 382.1481481  | 155.7616433   | 252.0409091 | 91.8193706   |
| TMED3       | 208837_at   | 0.0262332   | 348.3925926  | 71.93848294   | 280.7636364 | 52.74746255  |
| TMEM109     | 201361_at   | 0.0288586   | 333.0444444  | 96.58864137   | 306.3090909 | 79.58486282  |
| Tmem111     | 217882_at   | 0.0262273   | 973.2037037  | 323.7001218   | 802.3681818 | 205.4093298  |
| TMEM132A    | 218834_s_at | 0.0231728   | 506.1037037  | 100.6797416   | 443.2818182 | 109.3252101  |
| tmem161a    | 43977_at    | 0.0233562   | 502.1407407  | 162.3298263   | 403.6363636 | 94.92535185  |
| TMEM204     | 219315_s_at | 0.00103346  | 245.3962963  | 70.68895835   | 194.5045455 | 57.3549805   |
| TMEM30A     | 217743_s_at | 0.00107115  | 400.7777778  | 144.0964296   | 564.1681818 | 182.6881037  |
| TMEM47      | 209655_s_at | 0.00999784  | 402.0888889  | 155.4806798   | 662.8272727 | 327.3299401  |
| TMEM5       | 204807_at   | 0.00441938  | 86.40740741  | 28.27817759   | 113.9227273 | 35.96340643  |
| TMEM97      | 214283_at   | 0.00940393  | 152.7592593  | 52.46854193   | 124.3545455 | 54.7924806   |
| TMPRSS3     | 220177_s_at | 0.00148597  | 126.7518519  | 37.14802376   | 114.6363636 | 38.33781604  |
| tmub2       | 218419_s_at | 0.0255014   | 156.5518519  | 35.86398848   | 143.6590909 | 30.4330281   |
| TMX4        | 201580_s_at | 0.00578378  | 485.262963   | 95.83793672   | 628.7227273 | 188.5762873  |
| TNFRSF1B    | 203508_at   | 0.00338978  | 88.55925926  | 31.21513759   | 70.86818182 | 34.82671917  |
| Tnfsf12     | 209499_x_at | 0.0134724   | 181.2740741  | 82.23566788   | 174.1363636 | 64.59201296  |
| TNIK        | 211828_s_at | 0.00185758  | 364.1962963  | 109.4893724   | 484.8863636 | 102.2415874  |
| Tnip1       | 207196_s_at | 0.00371947  | 253.4814815  | 56.57621841   | 185.4227273 | 65.61507472  |
| tnks        | 202561_at   | 0.0270499   | 532.762963   | 93.78602138   | 635.8090909 | 146.6162659  |
| tnpo1       | 212635_at   | 0.0164314   | 198.5148148  | 57.82078215   | 246.9045455 | 85.65932789  |
| toe1        | 204080_at   | 0.000963247 | 182.0296296  | 41.39264906   | 131.2363636 | 47.73941713  |
| TOM1        | 202807_s_at | 0.0088126   | 237.1888889  | 55.13373484   | 191.2545455 | 51.78887293  |
| TOMM20      | 200662_s_at | 0.0147042   | 2555.659259  | 520.6821334   | 2825.963636 | 731.398221   |
| TOMM70A     | 201519_at   | 0.00249119  | 2987.892593  | 1047.346992   | 3578.268182 | 1018.039736  |
| TOP1        | 208901_s_at | 0.00404954  | 555.1518519  | 193.4572848   | 712.8909091 | 166.0828018  |
| TOP2B       | 211987_at   | 0.0123999   | 546.7740741  | 153.2530451   | 642.3954545 | 159.3930765  |

| Gene symbol | Probeset    | P value     | Mean Control | STDEV Control | Mean Heroin | STDEV Heroin |
|-------------|-------------|-------------|--------------|---------------|-------------|--------------|
| TOPBP1      | 202633_at   | 0.0123297   | 165.6037037  | 40.27257591   | 222.8272727 | 81.27983515  |
| Tox4        | 201684_s_at | 0.00713643  | 567.9        | 167.2710306   | 446.9636364 | 124.3554259  |
| TPD52       | 201690_s_at | 0.0022044   | 700.6037037  | 174.5370745   | 931.9863636 | 270.249388   |
| TPK1        | 221218_s_at | 0.00719709  | 103.8148148  | 27.55048099   | 127.3772727 | 21.03461845  |
| tpp2        | 203374_s_at | 0.0120161   | 108.5518519  | 30.84644812   | 139.85      | 44.77614958  |
| tpp2        | 203375_s_at | 0.0137442   | 134.9481481  | 41.79478593   | 161.0454545 | 37.95059103  |
| TPSB2       | 210084_x_at | 0.0132307   | 12.27777778  | 3.220049371   | 16.15       | 7.498809429  |
| TPST2       | 204079_at   | 0.0264188   | 186.7037037  | 59.0014438    | 165.9318182 | 47.51593604  |
| TRAF3IP2    | 215411_s_at | 0.00281089  | 126.3740741  | 70.29380973   | 85.23181818 | 47.71618859  |
| TRAF5       | 204352_at   | 0.0232273   | 224.4518519  | 98.19579879   | 266.4318182 | 82.27738442  |
| TRAK1       | 202080_s_at | 0.0012657   | 281.837037   | 81.99355579   | 366.4636364 | 124.3489045  |
| TRAPPC2P1   | 219351_at   | 0.00999296  | 197.7333333  | 39.06630458   | 237.7090909 | 50.47283955  |
| TRAPPC6A    | 204985_s_at | 0.0149588   | 320.1148148  | 82.10290777   | 252.6818182 | 77.79520512  |
| TRAV8-6     | 217170_at   | 0.0307067   | 23.11851852  | 23.63286559   | 15.12727273 | 5.119540699  |
| trex1       | 205875_s_at | 0.00590211  | 77.15925926  | 31.46275282   | 45.86818182 | 26.0837367   |
| trex1       | 34689_at    | 0.0123801   | 301.3814815  | 62.45119964   | 255.2409091 | 66.10484212  |
| Trex2       | 207891_s_at | 0.00296204  | 132.8555556  | 48.7340296    | 99.97727273 | 39.4436057   |
| Trex2       | 213334_x_at | 0.0017878   | 387.5259259  | 113.3114177   | 287.2818182 | 71.76518347  |
| trgv7       | 215345_x_at | 0.00294764  | 35.31111111  | 24.56334563   | 63.98636364 | 30.62604393  |
| TRHDE       | 219937_at   | 0.0273926   | 32.45555556  | 15.5514613    | 52.60454545 | 41.20549521  |
| trim23      | 204732_s_at | 0.00939474  | 211.7148148  | 70.45530882   | 261.0318182 | 91.33060503  |
| TRIM24      | 213301_x_at | 0.0295629   | 187.3814815  | 52.49994166   | 220.5909091 | 49.44012164  |
| trim33      | 212435_at   | 0.00333983  | 333.937037   | 110.1238224   | 469.4045455 | 120.6931034  |
| TRIM37      | 213009_s_at | 0.00367474  | 1267.185185  | 169.8526527   | 1458.918182 | 275.9562071  |
| TRIM52      | 221897_at   | 0.00593215  | 133.437037   | 37.4488076    | 174.2363636 | 49.98332622  |
| TRIO        | 215406_at   | 0.00383363  | 13.86296296  | 12.57892463   | 7.963636364 | 4.054456156  |
| Trmt1       | 210463_x_at | 0.00974714  | 198.0592593  | 68.95324647   | 145.5545455 | 54.58718433  |
| trmt5       | 221952_x_at | 0.0133916   | 1439.888889  | 638.2427591   | 1138.113636 | 343.3741279  |
| Trmt61a     | 221907_at   | 0.00266229  | 343.6777778  | 110.6634862   | 237.8772727 | 63.7302943   |
| Tro         | 205028_at   | 0.00754477  | 38.64074074  | 18.84089781   | 55.82272727 | 21.78201381  |
| Trpc1       | 205803_s_at | 0.0315371   | 145.137037   | 53.84328505   | 204.35      | 90.76883118  |
| TSC1        | 209390_at   | 0.03112     | 585.4481481  | 93.37418672   | 645.85      | 70.88436425  |
| TSC22D2     | 204094_s_at | 0.0169594   | 214.2222222  | 50.51945043   | 267.1045455 | 80.77756924  |
| TSFM        | 214331_at   | 0.0068804   | 57.75555556  | 38.24259942   | 87.08636364 | 37.01467271  |
| Tsga10      | 213411_at   | 0.000412132 | 501.1481481  | 185.2020983   | 661.5954545 | 137.0767824  |
| TSPAN3      | 200972_at   | 0.0227419   | 1692.411111  | 332.2454842   | 1967.659091 | 445.6177656  |
| Tspan31     | 203227_s_at | 0.0270001   | 789.6259259  | 241.5127845   | 596.3272727 | 212.672841   |
| TSPAN7      | 202242_at   | 0.00754576  | 3250.818519  | 1039.142047   | 3967.131818 | 742.5828723  |
| tspO        | 202096_s_at | 0.00823776  | 272.5888889  | 74.91604703   | 207.2136364 | 77.01523841  |
| Tspy1       | 217160_at   | 0.0256114   | 15.27777778  | 7.514362317   | 15.92727273 | 7.507024128  |

| Gene symbol | Probeset    | P value     | Mean Control | STDEV Control | Mean Heroin | STDEV Heroin |
|-------------|-------------|-------------|--------------|---------------|-------------|--------------|
| Tssc4       | 218612_s_at | 0.017909    | 172.7333333  | 81.64530699   | 104.3909091 | 73.46130766  |
| TST         | 209605_at   | 0.0165474   | 471.8888889  | 273.6859055   | 248.9318182 | 142.2258612  |
| TSTA3       | 201644_at   | 0.00566554  | 125.1111111  | 65.42768958   | 84.75       | 52.9106232   |
| TSTA3       | 36936_at    | 0.000192799 | 254.1259259  | 46.29046747   | 199.1318182 | 42.77607683  |
| TTC19       | 217964_at   | 0.0199738   | 705.6259259  | 194.1410601   | 824.7636364 | 233.7186252  |
| TTC23       | 219838_at   | 0.0193358   | 175.7962963  | 61.98194825   | 156.8409091 | 28.8754247   |
| TTC3L       | 208073_x_at | 0.00340674  | 2556.162963  | 1087.086514   | 3095.254545 | 906.6540574  |
| TTC3L       | 208662_s_at | 0.013273    | 1699.225926  | 684.6547651   | 2135.536364 | 558.3064584  |
| TTC3L       | 210645_s_at | 0.000369541 | 1578.844444  | 755.745375    | 2260.818182 | 672.5731227  |
| TLL12       | 216251_s_at | 0.0320202   | 351.7777778  | 66.17353836   | 327.2227273 | 71.15306728  |
| TLL2        | 217423_at   | 0.0274217   | 69.63333333  | 22.95138675   | 85.28181818 | 33.82264156  |
| Ttrap       | 202266_at   | 0.0196666   | 537.962963   | 158.7122581   | 674.1045455 | 163.0853369  |
| TUBA1A      | 209118_s_at | 0.0108849   | 13395.14815  | 4094.189989   | 10504.56364 | 2883.881605  |
| TUBA4A      | 212242_at   | 0.00837219  | 1559.77037   | 419.8757562   | 1053.495455 | 401.1128763  |
| tuba4b      | 207490_at   | 0.00717941  | 144.962963   | 42.06923916   | 109.6772727 | 34.65293132  |
| tubB        | 209026_x_at | 0.0302107   | 2262.051852  | 1240.967858   | 1732.781818 | 568.7787516  |
| TUBB2C      | 208977_x_at | 0.0292469   | 3559.981481  | 1125.63266    | 3025.627273 | 723.7293852  |
| TUBB2C      | 213726_x_at | 0.0328768   | 3685.396296  | 1052.060177   | 3124.8      | 756.2563354  |
| Tubgcp2     | 202477_s_at | 0.00259609  | 523.5740741  | 160.7832669   | 400.7909091 | 103.4777036  |
| TUBGCP3     | 203690_at   | 0.00582442  | 129.3555556  | 64.42354642   | 158.1090909 | 64.3871838   |
| TUG1        | 212337_at   | 0.00732772  | 251.9037037  | 67.82631371   | 366.4590909 | 138.6094673  |
| TUG1        | 222244_s_at | 0.00487616  | 566.6407407  | 174.1385793   | 789.7772727 | 229.1776976  |
| TULP4       | 218184_at   | 0.0271218   | 699.3148148  | 222.2317254   | 850.35      | 167.7894024  |
| tusc2       | 203272_s_at | 0.0104785   | 320.037037   | 131.7549244   | 231.3818182 | 75.44445851  |
| TUSC3       | 213423_x_at | 0.00918922  | 629.8777778  | 249.1908449   | 780.0318182 | 318.6895106  |
| TUSC3       | 209228_x_at | 0.0226419   | 470.2814815  | 183.659122    | 577.5818182 | 237.3666134  |
| tut1        | 218965_s_at | 0.0201963   | 51.48888889  | 31.61314641   | 34.42272727 | 24.21190049  |
| TXN2        | 209077_at   | 0.0148984   | 620.5555556  | 131.2739717   | 538.4       | 139.7800858  |
| TXN2        | 209078_s_at | 0.0248944   | 246.762963   | 96.62827325   | 204.2454545 | 55.97364794  |
| TXNIP       | 201010_s_at | 0.00747403  | 663.4        | 320.9738343   | 536.2454545 | 129.0777312  |
| TXNRD1      | 201266_at   | 0.00473555  | 363.0925926  | 112.0749094   | 487.3772727 | 116.9913222  |
| TYROBP      | 204122_at   | 0.0263843   | 188.1407407  | 90.32902787   | 139.6954545 | 58.113407    |
| UAP1        | 209340_at   | 0.0232591   | 214.0518519  | 52.11542198   | 253.9272727 | 60.46085851  |
| Ubap2l      | 210500_at   | 0.003925    | 34.18148148  | 18.80713934   | 26.50909091 | 18.11571034  |
| ube2b       | 211763_s_at | 0.0144462   | 710.8518519  | 223.0481896   | 810.5863636 | 212.2256622  |
| ube2d4      | 65521_at    | 0.0149258   | 307.5        | 73.7273042    | 288.5454545 | 72.28066149  |
| UBE2W       | 218521_s_at | 0.00176128  | 112.9962963  | 34.42535382   | 175.8045455 | 67.1398787   |
| Ube3a       | 213128_s_at | 0.00296664  | 316.4148148  | 95.39390685   | 381.4318182 | 77.74252612  |
| ubl3        | 201534_s_at | 0.0144802   | 300.2592593  | 136.0306845   | 504.2454545 | 243.134393   |
| ubl3        | 201535_at   | 0.000944736 | 1510.259259  | 464.5635911   | 2071.377273 | 538.1374058  |

| Gene symbol | Probeset    | P value     | Mean Control | STDEV Control | Mean Heroin | STDEV Heroin |
|-------------|-------------|-------------|--------------|---------------|-------------|--------------|
| UBR2        | 212756_s_at | 0.00121967  | 110.6296296  | 28.43487586   | 140.1409091 | 26.02018738  |
| UBR2        | 212760_at   | 0.000469393 | 389.8111111  | 86.14732164   | 527.5727273 | 113.0019856  |
| Ubxn1       | 201871_s_at | 0.00468229  | 662.0074074  | 192.4238949   | 479.8       | 155.2057283  |
| UBXN2B      | 212934_at   | 0.0257356   | 255.9925926  | 61.86028256   | 305.6318182 | 60.29507116  |
| ubxn6       | 220757_s_at | 0.0138757   | 488.5        | 164.8197244   | 355.5954545 | 119.496545   |
| UCHL5       | 219960_s_at | 0.033514    | 176.0962963  | 48.78645368   | 212.25      | 59.51533416  |
| UCHL5       | 220083_x_at | 0.0219701   | 49.28518519  | 21.0694402    | 54.58636364 | 18.90321957  |
| UFM1        | 218050_at   | 0.00326291  | 314.9851852  | 107.9867574   | 417.0681818 | 111.2988614  |
| UGCG        | 204881_s_at | 0.0135013   | 493.7703704  | 112.7269022   | 633.9772727 | 193.5841959  |
| Ugt1a1      | 204532_x_at | 0.0272067   | 156.0518519  | 67.97333397   | 125.6727273 | 50.11935451  |
| Ulk2        | 204063_s_at | 0.0301525   | 206.137037   | 39.44844882   | 239.1       | 53.53543553  |
| Uqcrc1      | 201903_at   | 0.0255149   | 1733.266667  | 652.80003     | 1230.268182 | 494.7246366  |
| Use1        | 219348_at   | 0.003412    | 287.6777778  | 81.26534569   | 198.5409091 | 72.92525632  |
| Use1        | 221706_s_at | 0.0223701   | 212.3222222  | 56.31578091   | 171.4772727 | 50.86913117  |
| USF2        | 202152_x_at | 0.00788682  | 882.5555556  | 214.9151627   | 676.5409091 | 173.8573653  |
| USF2        | 214879_x_at | 0.014785    | 654.8703704  | 132.580512    | 508.3454545 | 161.9561985  |
| USO1        | 201831_s_at | 0.0134451   | 169.5407407  | 75.90509894   | 223.3181818 | 71.62301197  |
| USO1        | 201832_s_at | 0.00659763  | 398.6666667  | 127.3622937   | 499.7045455 | 148.7538218  |
| USP15       | 209475_at   | 0.000319714 | 319.037037   | 69.29271328   | 428.7590909 | 93.62485252  |
| USP21       | 218367_x_at | 0.0100722   | 203.7518519  | 61.48684268   | 261.7590909 | 93.63841631  |
| usp25       | 220419_s_at | 0.0096959   | 437.4148148  | 71.98737445   | 521.7227273 | 114.9864503  |
| usp33       | 212513_s_at | 0.0100122   | 657.1407407  | 136.9770482   | 763.8136364 | 189.710989   |
| USP34       | 212066_s_at | 0.00802915  | 638.0740741  | 218.5493125   | 801.1318182 | 280.7197999  |
| USP46       | 203870_at   | 0.000601231 | 297.2703704  | 93.25797477   | 465.1136364 | 147.836484   |
| usp48       | 220078_at   | 0.00597493  | 132.7296296  | 66.14395614   | 152.8409091 | 43.64118478  |
| usp6        | 206405_x_at | 0.00675432  | 440.9444444  | 95.9793621    | 574.7772727 | 168.4121501  |
| Usp7        | 201498_at   | 0.0112964   | 704.3074074  | 274.9891186   | 772.4909091 | 205.100593   |
| usp8        | 202745_at   | 0.0246361   | 157.0444444  | 47.75317415   | 206.0272727 | 66.09821827  |
| USP9X       | 201100_s_at | 0.000935802 | 357.4925926  | 92.00330231   | 443.5       | 117.9872875  |
| UTP14C      | 203614_at   | 0.0122794   | 442.0777778  | 116.2727574   | 530.7227273 | 124.9283449  |
| UXT         | 218495_at   | 0.0153182   | 652.4222222  | 218.7204527   | 480.4772727 | 155.5791758  |
| Vamp4       | 213480_at   | 0.0110426   | 485.7703704  | 130.6162666   | 587.4909091 | 108.0980944  |
| vamp5       | 204929_s_at | 8.31834E-05 | 173.3222222  | 59.69652311   | 121.3227273 | 55.0211382   |
| Vamp8       | 202546_at   | 0.00524412  | 46.70740741  | 40.60850542   | 13.70909091 | 16.64397243  |
| vat1        | 208626_s_at | 0.00518372  | 614.7888889  | 145.1441361   | 512.7954545 | 156.2231386  |
| vbp1        | 201472_at   | 0.00424551  | 1142.155556  | 284.3965181   | 1280.804545 | 208.1109674  |
| VENTXP1     | 216726_at   | 0.0223493   | 9.992592593  | 3.553863112   | 8.640909091 | 3.242377007  |
| VKORC1      | 217949_s_at | 0.0214861   | 302.037037   | 79.94794532   | 275.4       | 68.55435105  |
| VPS13A      | 214785_at   | 0.00194966  | 105.4962963  | 35.44745278   | 166.9772727 | 59.844934    |
| Vps26a      | 201807_at   | 0.0209255   | 1120         | 268.6817591   | 1284.104545 | 214.3307535  |

| Gene symbol | Probeset    | P value     | Mean Control | STDEV Control | Mean Heroin | STDEV Heroin |
|-------------|-------------|-------------|--------------|---------------|-------------|--------------|
| VPS28       | 218679_s_at | 0.00141662  | 987.6148148  | 296.7682594   | 710.6636364 | 245.41215    |
| vwf         | 202112_at   | 0.000428275 | 530.5777778  | 164.4143086   | 370.4272727 | 135.4692802  |
| WAPAL       | 212267_at   | 0.0289065   | 201.4777778  | 61.04415384   | 250.9181818 | 59.07322846  |
| wars        | 200629_at   | 0.0224606   | 679.062963   | 127.5056353   | 554.0045455 | 131.4769959  |
| WAS         | 205400_at   | 0.0160786   | 39.82222222  | 27.65264396   | 30.28181818 | 23.67762931  |
| WASF1       | 204165_at   | 0.000680754 | 1685.466667  | 425.9593309   | 2213.122727 | 559.026804   |
| Wasf2       | 221725_at   | 0.0197768   | 268.1555556  | 81.30900382   | 217.3090909 | 66.00837544  |
| WASL        | 205810_s_at | 0.0124701   | 21.46666667  | 11.22147666   | 16.65454545 | 9.6033589    |
| WASL        | 205809_s_at | 0.0204074   | 433.2962963  | 205.9408102   | 555.2136364 | 222.9582543  |
| WBP4        | 203599_s_at | 0.00549544  | 272.9777778  | 76.74717902   | 354.9545455 | 96.71402975  |
| Wbscr22     | 207628_s_at | 0.0232891   | 501.8333333  | 72.57037963   | 421.1681818 | 112.7363354  |
| WDFY3       | 212602_at   | 0.0316105   | 153          | 54.91066171   | 212.8863636 | 82.10275383  |
| WDR11       | 218090_s_at | 0.0326525   | 164.7074074  | 41.97149148   | 195.0272727 | 65.67508901  |
| WDR37       | 211383_s_at | 0.0253173   | 222.6888889  | 47.26943502   | 256.7409091 | 55.4649152   |
| WDR44       | 219297_at   | 0.00769219  | 149.3703704  | 38.47099622   | 193.1681818 | 53.91045827  |
| Wdr61       | 215156_at   | 0.0213316   | 137.4111111  | 78.58058741   | 176.4772727 | 77.47856805  |
| WDR7        | 212880_at   | 3.39459E-06 | 817.9666667  | 199.3419077   | 1121.981818 | 258.7248118  |
| WDR74       | 218278_at   | 0.00527549  | 152.4407407  | 45.38513192   | 121.5636364 | 42.28974372  |
| WDR74       | 221712_s_at | 0.00309645  | 241.2962963  | 63.54866386   | 186.8409091 | 51.23034498  |
| WLS         | 221958_s_at | 0.00379368  | 312.862963   | 107.3721965   | 278.3863636 | 91.33623542  |
| wnt10b      | 206213_at   | 0.0122596   | 233.8740741  | 138.6098637   | 338.8136364 | 115.7779907  |
| wnt5b       | 221029_s_at | 0.0196637   | 71.48518519  | 27.55921881   | 52.62727273 | 23.85188785  |
| WRAP53      | 220258_s_at | 0.0136701   | 30.20740741  | 24.41180241   | 15.83636364 | 7.709891325  |
| wrnip1      | 218015_s_at | 0.0116457   | 57.97777778  | 25.51956012   | 41.08636364 | 15.06166042  |
| WSB1        | 201295_s_at | 0.0008641   | 30.44814815  | 18.91188821   | 54.94090909 | 24.53079035  |
| WSCD1       | 213157_s_at | 0.00471431  | 120.9074074  | 42.29856268   | 92.50909091 | 38.17895093  |
| wt1         | 216953_s_at | 0.00412562  | 15.71851852  | 13.09204212   | 8.154545455 | 3.601683108  |
| WWP1        | 212638_s_at | 0.00270123  | 664.0666667  | 212.9157237   | 868.7636364 | 278.1709521  |
| XK          | 206698_at   | 0.0144717   | 146.962963   | 36.13920892   | 179.2090909 | 39.78975591  |
| XPNPEP1     | 217380_s_at | 0.0180335   | 22.2037037   | 18.24072961   | 35.52272727 | 20.45552508  |
| Xrcc4       | 210812_at   | 0.0275037   | 9.962962963  | 4.269313415   | 16.00909091 | 13.90111024  |
| XRCC6       | 200792_at   | 0.00641846  | 2623.803704  | 609.9806961   | 2050.536364 | 589.8275701  |
| YEATS2      | 221203_s_at | 0.000175753 | 305.5148148  | 72.01524253   | 354.5227273 | 80.3922167   |
| YIF1A       | 202418_at   | 0.00116263  | 374.8851852  | 72.83478514   | 302.5818182 | 73.14860046  |
| YIPF6       | 212343_at   | 0.0248701   | 241.4074074  | 87.58557102   | 313.3772727 | 84.65407442  |
| YME1L1      | 201351_s_at | 0.0180795   | 289.6962963  | 78.51493969   | 350.4409091 | 89.85087465  |
| YME1L1      | 201352_at   | 0.0272755   | 630.7444444  | 232.2870478   | 777.4181818 | 254.6257153  |
| YME1L1      | 216304_x_at | 0.0238153   | 263.3888889  | 72.6101727    | 314.7636364 | 82.16085005  |
| Ythdc2      | 213077_at   | 0.0187208   | 143.8296296  | 49.09235265   | 195.1318182 | 56.18762265  |
| ZAK         | 218833_at   | 0.0303535   | 61.15185185  | 22.53826439   | 49.97272727 | 25.66882827  |

| Gene symbol | Probeset    | P value     | Mean Control | STDEV Control | Mean Heroin | STDEV Heroin |
|-------------|-------------|-------------|--------------|---------------|-------------|--------------|
| zap70       | 214032_at   | 0.0118965   | 27.69259259  | 20.96394205   | 40.42272727 | 25.42550148  |
| zbtb11      | 204847_at   | 0.0142097   | 237.8        | 66.92939449   | 309.7454545 | 97.49615244  |
| ZBTB16      | 205883_at   | 0.00431488  | 179.7037037  | 72.83101876   | 140.7818182 | 49.16403676  |
| ZBTB20      | 205383_s_at | 0.014745    | 1189.114815  | 487.795828    | 1518.372727 | 390.8758385  |
| Zc3h14      | 213064_at   | 0.0113061   | 282.8888889  | 97.66539948   | 374.8       | 111.468441   |
| ZC3H15      | 201595_s_at | 0.00386158  | 389.4148148  | 92.20435374   | 484.5681818 | 119.4561501  |
| ZCCHC11     | 212704_at   | 0.0271465   | 210.8777778  | 77.65543883   | 288.9954545 | 90.04090328  |
| ZCCHC14     | 212655_at   | 0.030493    | 206.1925926  | 89.7430517    | 273.7863636 | 61.3696163   |
| zcchc8      | 218478_s_at | 0.00173967  | 121.237037   | 28.26967862   | 171.75      | 48.4756861   |
| ZDHC17      | 212982_at   | 0.00016695  | 523.5666667  | 181.4280786   | 779.6272727 | 213.0665941  |
| ZEB1        | 212758_s_at | 0.00508386  | 321.0481481  | 120.838498    | 438.2954545 | 134.647821   |
| ZEB1        | 212764_at   | 0.00261663  | 519.262963   | 178.0729823   | 837.9590909 | 343.3511886  |
| Zfc3h1      | 213065_at   | 0.000387699 | 292.7296296  | 80.01711747   | 415.2545455 | 96.96460683  |
| ZFHX3       | 208033_s_at | 0.00931097  | 20.95555556  | 13.74765248   | 39.94545455 | 26.01226318  |
| ZFP36L2     | 201368_at   | 0.0192862   | 364.5407407  | 85.62639896   | 497.6090909 | 209.8911507  |
| ZFPL1       | 209428_s_at | 0.0181403   | 155.8481481  | 79.85701342   | 120.4681818 | 52.51699395  |
| ZFX         | 214678_x_at | 0.0118258   | 37.42962963  | 13.3289683    | 50.36818182 | 21.47260461  |
| zgpap       | 221848_at   | 0.0013476   | 92.18148148  | 53.15345012   | 41.10454545 | 30.35779459  |
| zgpap       | 57539_at    | 0.00465174  | 151.637037   | 56.21522616   | 104.6       | 28.83268648  |
| ZMAT4       | 219877_at   | 0.00196716  | 132.3962963  | 98.4273433    | 174.4136364 | 86.71956607  |
| Zmiz1       | 212124_at   | 0.028589    | 582.3407407  | 100.597795    | 705.5227273 | 153.8963131  |
| zmpste24    | 202939_at   | 0.0321296   | 504.7925926  | 146.5846223   | 620.65      | 143.1739926  |
| Zmym4       | 202051_s_at | 0.0205659   | 336.0555556  | 61.3489034    | 420.9409091 | 98.92595432  |
| zmynd11     | 202136_at   | 0.0278584   | 2068.962963  | 594.0927143   | 2441.245455 | 568.908974   |
| ZNF12       | 217488_x_at | 0.0312498   | 13.3962963   | 4.299953621   | 19.38181818 | 12.32514412  |
| ZNF12       | 219571_s_at | 0.0281365   | 167.537037   | 61.42986713   | 207.5681818 | 49.67665339  |
| ZNF131      | 221842_s_at | 0.0277117   | 126.2222222  | 42.73185025   | 177.0909091 | 69.55167938  |
| ZNF148      | 203319_s_at | 0.00633545  | 227.8888889  | 92.85603552   | 334.5181818 | 135.1482101  |
| ZNF174      | 205252_at   | 0.0302011   | 187.8        | 24.57163781   | 170.1636364 | 27.90797028  |
| ZNF204P     | 214823_at   | 0.0118793   | 156.2888889  | 40.94101135   | 188.5909091 | 44.6347602   |
| ZNF211      | 205437_at   | 0.0175218   | 103.2925926  | 37.11392985   | 128.2136364 | 34.91809867  |
| znf292      | 212368_at   | 0.00167699  | 465.6962963  | 151.4499295   | 669.3954545 | 181.6426987  |
| ZNF32       | 209538_at   | 0.0239884   | 321.237037   | 69.16640552   | 259.1954545 | 60.62603148  |
| ZNF394      | 214714_at   | 0.0238605   | 106.1740741  | 67.23184109   | 78.65909091 | 34.77397301  |
| ZNF408      | 219224_x_at | 0.000540605 | 189.6037037  | 94.40258912   | 103.5227273 | 50.71111395  |
| ZNF440      | 215892_at   | 0.0206329   | 38.32592593  | 21.50712928   | 47.64090909 | 27.74030348  |
| ZNF45       | 222028_at   | 0.00296503  | 131.0111111  | 42.84563826   | 144.8727273 | 28.20351518  |
| ZNF460      | 216273_at   | 0.00666527  | 52.64814815  | 32.70651982   | 28.85454545 | 17.60591695  |
| ZNF500      | 41113_at    | 0.00559496  | 93.81851852  | 27.04893055   | 82.51818182 | 21.67993666  |
| ZNF529      | 215307_at   | 0.00164618  | 271.1148148  | 74.48821643   | 353.4363636 | 116.5552701  |

| Gene symbol | Probeset            | P value     | Mean Control | STDEV Control | Mean Heroin | STDEV Heroin |
|-------------|---------------------|-------------|--------------|---------------|-------------|--------------|
| znf574      | 218762_at           | 0.0130369   | 55.20740741  | 31.94805792   | 41.03181818 | 23.38056552  |
| znf574      | 221844_x_at         | 0.0210736   | 923.9481481  | 338.1187028   | 1036.154545 | 273.7183167  |
| ZNF587      | 219981_x_at         | 0.0241338   | 451.7740741  | 187.2390381   | 511.1954545 | 105.8590099  |
| znf593      | 204175_at           | 0.013153    | 311.9333333  | 103.3476582   | 209.3454545 | 60.44092533  |
| ZNF688      | 213527_s_at         | 0.00652331  | 221.3888889  | 77.60553774   | 169.5227273 | 49.34869065  |
| ZNF688      | 213529_at           | 0.0034678   | 53.78518519  | 24.12352353   | 33.59090909 | 25.3574993   |
| ZNF747      | 206180_x_at         | 0.00728677  | 265.6407407  | 90.73563993   | 215.8409091 | 84.78859795  |
| ZNF75D      | 214813_at           | 0.00686269  | 63.93703704  | 27.80471941   | 77.47727273 | 23.60516352  |
| ZNF768      | 218916_at           | 0.023467    | 153.4111111  | 51.90699029   | 113.7818182 | 40.65942913  |
| ZNF804A     | 215767_at           | 0.0106307   | 186.6851852  | 65.64769434   | 244.2318182 | 78.95668726  |
| znf84       | 204453_at           | 0.0128237   | 39.56296296  | 26.46616342   | 53.75       | 27.45855318  |
| ZNF91       | 206059_at           | 0.0190582   | 509.1333333  | 159.8225699   | 715.6181818 | 258.8677115  |
| Znhit1      | 201541_s_at         | 0.00678464  | 566.437037   | 141.7956687   | 418.6227273 | 154.9160078  |
| ZNHIT6      | 218932_at           | 0.0215171   | 235.4296296  | 67.0943699    | 274.2136364 | 43.88338763  |
| ZWILCH      | 218349_s_at         | 0.00248835  | 20.27407407  | 18.45352984   | 44.50909091 | 26.37421015  |
| ZXDB        | 215263_at           | 0.00720609  | 55.67777778  | 25.09146857   | 45.19545455 | 20.85860511  |
|             | 214376_at           | 0.00916607  | 394.9222222  | 95.61148279   | 435.6       | 89.70484937  |
|             | 207371_at           | 0.0124008   | 5.433333333  | 5.429265427   | 16.38181818 | 15.85273407  |
|             | 208187_s_at         | 0.0154991   | 86.67777778  | 36.45429523   | 63.85       | 23.54154888  |
|             | 208340_at           | 0.015611    | 14.59259259  | 11.53329381   | 20.52727273 | 13.78174023  |
|             | 213156_at           | 0.017336    | 213.2518519  | 104.7797998   | 299.4181818 | 91.56385561  |
|             | 213904_at           | 0.00149499  | 1287.144444  | 487.0809634   | 1838.972727 | 588.4411312  |
|             | 214809_at           | 0.0135727   | 30.5962963   | 15.58748219   | 44.64090909 | 21.20549478  |
|             | 215149_at           | 0.00128211  | 143.0444444  | 44.45982917   | 226.7363636 | 92.45282733  |
|             | 215287_at           | 0.0087822   | 134.9185185  | 44.39718492   | 187.1045455 | 72.17460625  |
|             | 215423_at           | 0.00225659  | 253.6148148  | 83.73964094   | 344.8227273 | 101.3045147  |
|             | 215469_at           | 0.00108163  | 42.47777778  | 22.04372112   | 72.54090909 | 31.61602455  |
|             | 216151_at           | 0.00850791  | 15.05925926  | 18.82601022   | 7.627272727 | 10.90042296  |
|             | 216384_x_at         | 0.000632713 | 1110.633333  | 473.1983516   | 661.2909091 | 228.6952285  |
|             | 216518_at           | 0.00425202  | 53.41481481  | 26.84470588   | 86.01818182 | 41.61537761  |
|             | 216565_x_at         | 0.019365    | 201.3592593  | 111.8266559   | 170.5227273 | 74.00315265  |
|             | 216715_at           | 0.011029    | 62.72592593  | 36.43184989   | 42.98181818 | 23.94560575  |
|             | 217313_at           | 0.00153461  | 167.7111111  | 54.74258175   | 116.0954545 | 52.23112078  |
|             | 217322_x_at         | 0.0036469   | 78.17407407  | 28.70861024   | 65.44090909 | 22.09970177  |
|             | 217435_x_at         | 0.00185407  | 47.84074074  | 27.37027106   | 73.39090909 | 46.49840662  |
|             | 217695_x_at         | 0.00200642  | 47.68888889  | 14.5507952    | 69.13636364 | 23.68768106  |
|             | 220697_at           | 0.00364399  | 18.33333333  | 16.90172954   | 31.36818182 | 13.96800379  |
|             | 220809_at           | 0.0148045   | 7.181481481  | 4.143209183   | 13.13181818 | 10.48379186  |
|             | AFFX-r2-Bs-phe-5_at | 0.0136151   | 5.822222222  | 7.672595255   | 11.86818182 | 10.56838891  |
|             | 207879_at           | 0.0236475   | 6.040740741  | 5.353737678   | 10.10909091 | 9.906991715  |



| Gene symbol | Probeset    | P value   | Mean Control | STDEV Control | Mean Heroin | STDEV Heroin |
|-------------|-------------|-----------|--------------|---------------|-------------|--------------|
|             | 208278_s_at | 0.0273766 | 7.333333333  | 3.401244116   | 10.33181818 | 6.060204803  |
|             | 209733_at   | 0.0273327 | 164.7777778  | 48.51633613   | 200.5863636 | 55.99195772  |
|             | 215182_x_at | 0.030908  | 94.75185185  | 74.66667144   | 69.18636364 | 32.87338329  |
|             | 216406_at   | 0.0321011 | 9.914814815  | 10.9434808    | 16.91818182 | 16.37828517  |
|             | 216527_at   | 0.0197785 | 52.81111111  | 40.40106942   | 44.42272727 | 20.9168406   |
|             | 216794_at   | 0.0223754 | 29.27037037  | 28.26386406   | 52.05       | 35.42499454  |
|             | 216806_at   | 0.0305296 | 146.5814815  | 58.78966443   | 120.0318182 | 42.58277526  |
|             | 216861_at   | 0.026026  | 4.822222222  | 5.495685954   | 3.55        | 2.22512707   |
|             | 217459_at   | 0.0206226 | 30.23703704  | 36.19196838   | 19.08181818 | 15.88241425  |
|             | 217498_at   | 0.0275511 | 31.41481481  | 21.55487993   | 46.49545455 | 21.77174834  |
|             | 220906_at   | 0.0251465 | 76.45555556  | 30.61270894   | 97.69545455 | 28.52296447  |
|             | 220912_at   | 0.0323135 | 49.41481481  | 21.05081222   | 59.45454545 | 17.5506811   |
|             | 221973_at   | 0.0289132 | 134.8777778  | 65.94514231   | 190.7090909 | 82.99621282  |
|             | 222145_at   | 0.0230974 | 16.71481481  | 19.87881949   | 33.47272727 | 25.4544632   |
|             | 222312_s_at | 0.0287244 | 54.75925926  | 23.81420486   | 72.62727273 | 20.24721455  |

**Supplemental Table S4.** The most significantly enriched cluster from the gene ontology analysis (Database for Annotation, Visualization and Integrated Discovery v6.7) related to synaptic function.

| Annotation Cluster 1 |                                  | Enrichment Score: 4.638400628756887 |             |             |            |          |           |                 |             |             |             |
|----------------------|----------------------------------|-------------------------------------|-------------|-------------|------------|----------|-----------|-----------------|-------------|-------------|-------------|
| Category             | Term                             | Count                               | %           | PValue      | List Total | Pop Hits | Pop Total | Fold Enrichment | Bonferroni  | Benjamini   | FDR         |
| GOTERM_CC_FAT        | GO:0045202~synapse               | 46                                  | 4.590818363 | 9.27E-08    | 696        | 355      | 12782     | 2.379682694     | 4.49E-05    | 4.49E-05    | 1.33E-04    |
| GOTERM_CC_FAT        | GO:0044456~synapse part          | 34                                  | 3.393213573 | 1.39E-06    | 696        | 246      | 12782     | 2.538244089     | 6.73E-04    | 2.24E-04    | 0.001992408 |
| GOTERM_CC_FAT        | GO:0014069~postsynaptic density  | 16                                  | 1.596806387 | 4.89E-06    | 696        | 71       | 12782     | 4.138578598     | 0.002363952 | 5.92E-04    | 0.007009323 |
| SP_PIR_KEYWORDS      | synapse                          | 28                                  | 2.794411178 | 1.26E-05    | 984        | 213      | 19235     | 2.569659147     | 0.006523746 | 5.45E-04    | 0.018253938 |
| SP_PIR_KEYWORDS      | postsynaptic cell membrane       | 18                                  | 1.796407186 | 4.18E-05    | 984        | 110      | 19235     | 3.198725055     | 0.021447983 | 0.001444378 | 0.06045516  |
| SP_PIR_KEYWORDS      | cell junction                    | 39                                  | 3.892215569 | 1.73E-04    | 984        | 399      | 19235     | 1.910683721     | 0.085803097 | 0.004971451 | 0.249903844 |
| GOTERM_CC_FAT        | GO:0045211~postsynaptic membrane | 19                                  | 1.896207585 | 3.70E-04    | 696        | 135      | 12782     | 2.584695615     | 0.163804673 | 0.016131476 | 0.528423673 |
| GOTERM_CC_FAT        | GO:0030054~cell junction         | 44                                  | 4.391217565 | 0.003685232 | 696        | 518      | 12782     | 1.559956508     | 0.832529311 | 0.074751885 | 5.154765208 |

### Supplemental Table S5. List of differentially expressed genes related to glutamatergic neurotransmission from the human nucleus accumbens microarray.

| Symbol  | Gene Name                                                                     | Function related to Glutamate                                                                        | Probe ID    | Fold Diff   | p value     | CoM    | CoSTD  | He M   | He STD |
|---------|-------------------------------------------------------------------------------|------------------------------------------------------------------------------------------------------|-------------|-------------|-------------|--------|--------|--------|--------|
| ALDH1L1 | aldehyde dehydrogenase 1 family, member L1                                    | Glutamine synthesis, glutamate metabolism                                                            | 205208_at   | 0.719519882 | 0.00262464  | 504.8  | 123.2  | 363.2  | 161.4  |
| STX12   | syntaxin 12                                                                   | Part a presynaptic membrane complex that releases neurotransmitters from vesicles                    | 212111_at   | 0.788851544 | 7.40E-11    | 940.0  | 273.8  | 741.5  | 160.2  |
| LYN     | v-yes-1 Yamaguchi sarcoma viral related oncogene homolog                      | Interacts with glutamate receptors to regulate glutamate-mediated signaling                          | 210754_s_at | 0.838678193 | 0.00128792  | 86.9   | 26.1   | 72.9   | 30.5   |
| PHGDH   | phosphoglycerate dehydrogenase                                                | Glutamine synthesis                                                                                  | 201397_at   | 0.759535939 | 0.00117179  | 797.7  | 286.5  | 605.9  | 217.9  |
| asl     | argininosuccinate lyase                                                       | Glutamine synthesis                                                                                  | 204608_at   | 0.775041829 | 0.00177278  | 163.0  | 35.9   | 126.3  | 41.7   |
| PLEKHG3 | pleckstrin homology domain containing, family G (with RhoGef domain) member 3 | Part of the post-synaptic density                                                                    | 217044_s_at | 0.712391775 | 0.00200988  | 100.8  | 59.5   | 71.8   | 37.8   |
| HOMER3  | homer homolog 3 ( <i>Drosophila</i> )                                         | Part of the post-synaptic density                                                                    | 204647_at   | 0.718056919 | 2.38E-05    | 226.4  | 111.3  | 162.6  | 57.5   |
| Cps1    | carbamoyl-phosphate synthetase 1, mitochondrial                               | Glutamine synthesis, glutamate metabolism                                                            | 217564_s_at | 0.683418506 | 0.00016964  | 31.6   | 22.5   | 21.6   | 19.9   |
| PLEKHO1 | pleckstrin homology domain containing, family O member 1                      | Part of the post-synaptic density                                                                    | 218223_s_at | 0.801755853 | 0.0904817   | 292.7  | 88.3   | 234.7  | 79.5   |
| Lin7b   | lin-7 homolog B ( <i>C. elegans</i> )                                         | forms a complex with Dlg (discs large)                                                               | 219760_at   | 0.746894325 | 0.0593337   | 600.2  | 172.2  | 448.3  | 165.3  |
| STX5    | syntaxin 5                                                                    | Part a presynaptic membrane complex that releases neurotransmitters from vesicles                    | 203330_s_at | 0.840906808 | 0.0857359   | 147.5  | 31.1   | 124.0  | 48.2   |
| FAH     | fumarylacetoacetate hydrolase (fumarylacetoacetase)                           | Glutamine synthesis                                                                                  | 202862_at   | 0.866001341 | 0.00216767  | 154.1  | 38.1   | 133.5  | 47.5   |
| agxt    | alanine-glyoxylate aminotransferase                                           | Glutamate metabolism                                                                                 | 206957_at   | 0.708797143 | 0.000305463 | 23.4   | 17.8   | 16.6   | 25.7   |
| ctps2   | CTP synthase II                                                               | Glutamine synthesis                                                                                  | 219080_s_at | 0.868562831 | 0.0331049   | 62.4   | 27.6   | 54.2   | 23.9   |
| FPGS    | folypolyglutamate synthase                                                    | Glutamate synthesis                                                                                  | 202945_at   | 0.804266298 | 0.00049188  | 214.9  | 54.5   | 172.9  | 60.6   |
| LYN     | v-yes-1 Yamaguchi sarcoma viral related oncogene homolog                      | Interacts with glutamate receptors to regulate glutamate-mediated signaling                          | 202625_at   | 0.825857405 | 0.00743143  | 42.4   | 22.4   | 35.1   | 14.8   |
| Ppp1ca  | protein phosphatase 1, catalytic subunit, alpha isoform                       | involved in DARPP32 signaling downstream of glutamate receptor activation                            | 200846_s_at | 0.720161402 | 4.63E-05    | 634.6  | 351.7  | 457.0  | 207.5  |
| PPP3CC  | protein phosphatase 3 (formerly 2B), catalytic subunit, gamma isoform         | involved in DARPP32 signaling downstream of glutamate receptor activation                            | 207000_s_at | 0.834488644 | 0.000308712 | 57.6   | 21.7   | 48.1   | 24.6   |
| Psd4    | pleckstrin and Sec7 domain containing 4                                       | Part of the post-synaptic density                                                                    | 215923_s_at | 0.801976447 | 0.00212004  | 36.0   | 30.6   | 28.9   | 21.4   |
| Qpctl   | glutaminyl-peptide cyclotransferase-like                                      | Glutamine/glutamate synthesis                                                                        | 220438_at   | 0.600366501 | 6.59E-05    | 48.0   | 33.4   | 28.8   | 16.1   |
| slc1a4  | solute carrier family 1 (glutamate/neutral amino acid transporter), member 4  | Glutamate transport                                                                                  | 209610_s_at | 0.889414673 | 0.000452779 | 978.1  | 434.6  | 870.0  | 213.8  |
| STX4    | syntaxin 4                                                                    | Part a presynaptic membrane complex that releases neurotransmitters from vesicles                    | 203530_s_at | 0.816623396 | 0.012235    | 299.4  | 59.7   | 244.5  | 73.3   |
| Stx8    | syntaxin 8                                                                    | Part a presynaptic membrane complex that releases neurotransmitters from vesicles                    | 204690_at   | 0.763760724 | 0.00298378  | 672.5  | 254.7  | 513.7  | 122.7  |
| Abi1    | abl-interactor 1                                                              | Localized to the PSD and regulates dendrite formation                                                | 209028_s_at | 1.286532678 | 0.0323768   | 321.1  | 70.8   | 413.1  | 142.5  |
| STX6    | syntaxin 6                                                                    | Part a presynaptic membrane complex that releases neurotransmitters from vesicles                    | 212799_at   | 1.16365695  | 0.00043935  | 567.5  | 107.0  | 660.4  | 79.1   |
| Grm5    | glutamate receptor, metabotropic 5                                            | receptor                                                                                             | 214217_at   | 1.602996384 | 0.00109434  | 418.6  | 146.7  | 671.0  | 246.9  |
| Syt1    | synaptotagmin I                                                               | Part a presynaptic membrane complex that releases neurotransmitters from vesicles                    | 203999_at   | 1.388402947 | 1.06E-05    | 2661.8 | 803.1  | 3695.7 | 1037.8 |
| Syt1    | synaptotagmin I                                                               | Part a presynaptic membrane complex that releases neurotransmitters from vesicles                    | 203998_s_at | 1.491909911 | 6.03E-07    | 421.6  | 212.0  | 629.1  | 286.7  |
| GRIA2   | glutamate receptor, ionotropic, AMPA 2                                        | receptor                                                                                             | 205358_at   | 1.405584094 | 7.29E-05    | 2856.0 | 1135.3 | 4014.3 | 1071.3 |
| PSD3    | pleckstrin and Sec7 domain containing 3                                       | Part of the post-synaptic density                                                                    | 218613_at   | 1.331289189 | 1.13E-07    | 1174.6 | 380.5  | 1563.7 | 376.0  |
| Akap9   | A kinase (PRKA) anchor protein (yotiao) 9                                     | Postsynaptic excitatory synapses; scaffolding proteins that ensure protein kinase target specificity | 210962_s_at | 1.352397695 | 0.000276254 | 269.8  | 98.9   | 364.8  | 101.5  |
| ErbB4   | v-erb-a erythroblastic leukemia viral oncogene homolog 4 (avian)              | Interacts with neuregulin to modulate NMDA receptors by causing them to be "hypophosphorylated"      | 214053_at   | 1.361420346 | 0.000834179 | 764.9  | 233.1  | 1041.3 | 338.9  |

| Symbol    | Gene Name                                                                                                                          | Function related to Glutamate                                                                        | Probe ID    | Fold Diff   | p value     | CoM    | CoSTD  | He M   | He STD |
|-----------|------------------------------------------------------------------------------------------------------------------------------------|------------------------------------------------------------------------------------------------------|-------------|-------------|-------------|--------|--------|--------|--------|
| nlg1      | neuroligin 1                                                                                                                       | participates in organization of glutamatergic synapses                                               | 205893_at   | 1.378519933 | 0.00647114  | 160.8  | 37.0   | 221.7  | 68.7   |
| DNM3      | dynamin 3                                                                                                                          | Interacts with homer; controls vesicle trafficking                                                   | 209839_at   | 1.446917436 | 0.000899122 | 710.3  | 237.7  | 1027.7 | 382.6  |
| DLGAP2    | discs, large (Drosophila) homolog-associated protein 2                                                                             | Participate in organization of synapses by regulated cell-cell junctions                             | 216916_s_at | 1.300596244 | 3.54E-08    | 13.9   | 4.1    | 18.1   | 6.3    |
| Gad1      | glutamate decarboxylase 1 (brain, 67kDa)                                                                                           | Glutamine synthesis, glutamate metabolism                                                            | 205278_at   | 1.181962338 | 0.000115257 | 2835.5 | 613.6  | 3351.4 | 1060.6 |
| Igi1      | leucine-rich, glioma inactivated 1                                                                                                 | Downregulates glutamatergic synapse function; an epilepsy candidate gene                             | 206349_at   | 1.318023214 | 0.000277323 | 840.7  | 275.9  | 1108.0 | 263.5  |
| DLGAP2    | discs, large (Drosophila) homolog-associated protein 2                                                                             | Participate in organization of synapses by regulated cell-cell junctions                             | 210227_at   | 1.339679089 | 6.90E-05    | 454.7  | 147.0  | 609.1  | 160.6  |
| GLS       | glutaminase                                                                                                                        | Glutamine/glutamate synthesis                                                                        | 203159_at   | 1.234400475 | 0.00391125  | 1492.9 | 447.5  | 1842.8 | 442.3  |
| PPP1R12A  | protein phosphatase 1, regulatory (inhibitor) subunit 12A                                                                          | involved in DARPP32 signaling downstream of glutamate receptor activation                            | 201603_at   | 1.313608291 | 0.000151867 | 248.9  | 96.8   | 326.9  | 108.9  |
| PSD3      | pleckstrin and Sec7 domain containing 3                                                                                            | Part of the post-synaptic density                                                                    | 203354_s_at | 1.754131769 | 0.00388377  | 892.9  | 343.8  | 1566.3 | 892.4  |
| PLCB1     | phospholipase C, beta 1 (phosphoinositide-specific)                                                                                | involved in signaling downstream of glutamate receptor activation                                    | 213222_at   | 1.30651601  | 0.00890285  | 1710.0 | 694.1  | 2234.1 | 933.7  |
| PCLO      | piccolo (presynaptic cytomatrix protein)                                                                                           | Scaffolding protein that provides structural organization presynaptically for excitatory synapses    | 213558_at   | 1.272503679 | 0.00199762  | 1164.0 | 447.8  | 1481.2 | 323.3  |
| SLC7A11   | solute carrier family 7, (cationic amino acid transporter, y+ system) member 11                                                    | Glutamate transport                                                                                  | 207528_s_at | 1.41229442  | 0.000895507 | 60.1   | 23.3   | 84.8   | 37.3   |
| ADCY1     | adenylate cyclase 1 (brain)                                                                                                        | Calcium sensitive AC that will get activated after excitatory neurotransmission                      | 213245_at   | 1.259410845 | 0.0172213   | 342.6  | 164.7  | 431.4  | 202.5  |
| Nrxn3     | neuroligin 3                                                                                                                       | Interact with neuroligins; participates in organization of glutamatergic synapses                    | 205795_at   | 1.565932158 | 0.00786083  | 98.9   | 61.5   | 154.9  | 77.0   |
| PLEKHA5   | pleckstrin homology domain containing, family A member 5                                                                           | Part of the post-synaptic density                                                                    | 220952_s_at | 1.229388834 | 9.22E-05    | 592.9  | 303.1  | 728.9  | 241.1  |
| Rab11fip2 | RAB11 family interacting protein 2 (class I)                                                                                       | involved in recycling of glutamate transporters                                                      | 203883_s_at | 1.33646037  | 0.0057209   | 350.9  | 103.7  | 468.9  | 137.0  |
| GFPT1     | glutamine-fructose-6-phosphate transaminase 1                                                                                      | Glutamine synthesis, glutamate metabolism                                                            | 202722_s_at | 1.185841251 | 0.106597    | 118.0  | 29.5   | 140.0  | 36.0   |
| AKAP5     | A kinase (PRKA) anchor protein 5                                                                                                   | Postsynaptic excitatory synapses; scaffolding proteins that ensure protein kinase target specificity | 207800_at   | 1.518209193 | 0.00692543  | 71.3   | 33.6   | 108.3  | 36.1   |
| SLC7A11   | solute carrier family 7, (cationic amino acid transporter, y+ system) member 11                                                    | Glutamate transport                                                                                  | 209921_at   | 1.387002094 | 0.000538279 | 335.1  | 113.4  | 464.8  | 181.6  |
| ABI2      | abl interactor 2                                                                                                                   | Localized to the PSD and regulates dendrite formation                                                | 216113_at   | 2.253919801 | 0.00213138  | 22.2   | 20.8   | 50.1   | 30.7   |
| SLC1A1    | solute carrier family 1 (neuronal/epithelial high affinity glutamate transporter, system Xag), member 1                            | Glutamate transport                                                                                  | 213664_at   | 1.240760306 | 0.000155762 | 469.1  | 134.6  | 582.1  | 164.1  |
| ppp3ca    | protein phosphatase 3 (formerly 2B), catalytic subunit, alpha isoform                                                              | involved in DARPP32 signaling downstream of glutamate receptor activation                            | 202429_s_at | 1.267543295 | 0.00115464  | 4333.9 | 1627.7 | 5493.4 | 1593.9 |
| PRKACB    | protein kinase, cAMP-dependent, catalytic, beta                                                                                    | involved in signaling downstream of glutamate receptor activation                                    | 202741_at   | 1.226359778 | 0.059965    | 5028.7 | 998.0  | 6166.9 | 1534.3 |
| SHANK2    | SH3 and multiple ankyrin repeat domains 2                                                                                          | PSD, scaffolding protein at glutamatergic synapses                                                   | 213308_at   | 1.512379844 | 0.000295425 | 365.1  | 118.0  | 552.2  | 206.2  |
| sdcbp     | syndecan binding protein (syntenin)                                                                                                | Binds glutamate receptors; involved in LTP                                                           | 200958_s_at | 1.196817807 | 0.0352174   | 1846.5 | 518.5  | 2210.0 | 593.2  |
| AKAP7     | A kinase (PRKA) anchor protein 7                                                                                                   | Postsynaptic excitatory synapses; scaffolding proteins that ensure protein kinase target specificity | 205771_s_at | 1.252085322 | 0.0489185   | 193.6  | 55.2   | 242.4  | 46.3   |
| Nrxn3     | neuroligin 3                                                                                                                       | Interact with neuroligins; participates in organization of glutamatergic synapses                    | 215021_s_at | 1.703620955 | 0.00888573  | 10.9   | 5.5    | 18.6   | 11.8   |
| Canx      | calnexin                                                                                                                           | Colocalizes with glutamate receptors in ER compartments in dendrites                                 | 200068_s_at | 1.137466405 | 0.00556841  | 2168.6 | 305.6  | 2466.7 | 431.8  |
| CALM3     | calmodulin 3 (phosphorylase kinase, delta); calmodulin 2 (phosphorylase kinase, delta); calmodulin 1 (phosphorylase kinase, delta) | Calcium sensitive kinase that will get activated in response to glutamate receptor stimulation       | 211984_at   | 1.214846752 | 9.39E-05    | 6565.4 | 1642.4 | 7976.0 | 2144.5 |
| GRM3      | glutamate receptor, metabotropic 3                                                                                                 | receptor                                                                                             | 205814_at   | 1.156044618 | 0.00655383  | 1286.7 | 429.3  | 1487.5 | 371.3  |
| camk4     | calcium/calmodulin-dependent protein kinase IV                                                                                     | Calcium sensitive kinase that will get activated in response to glutamate receptor stimulation       | 210349_at   | 1.319657031 | 0.0112823   | 142.2  | 46.8   | 187.6  | 51.2   |
| ppp3ca    | protein phosphatase 3 (formerly 2B), catalytic subunit, alpha isoform                                                              | involved in DARPP32 signaling downstream of glutamate receptor activation                            | 202457_s_at | 1.219414715 | 0.00304166  | 5360.5 | 2052.2 | 6536.7 | 1670.0 |
| GPHN      | gephyrin                                                                                                                           | PSD, scaffolding protein at glutamatergic synapses                                                   | 215578_at   | 1.468750236 | 0.00716162  | 44.6   | 24.0   | 65.5   | 21.5   |

| Symbol    | Gene Name                                                                                    | Function related to Glutamate                                                                                            | Probe ID    | Fold Diff   | p value     | CoM    | CoSTD | He M   | He STD |
|-----------|----------------------------------------------------------------------------------------------|--------------------------------------------------------------------------------------------------------------------------|-------------|-------------|-------------|--------|-------|--------|--------|
| DLG1      | discs, large homolog 1 (Drosophila)                                                          | Participate in organization of synapses by regulated cell-cell junctions                                                 | 202515_at   | 1.147480908 | 0.0165006   | 1497.5 | 339.3 | 1718.4 | 316.4  |
| GRIA1     | glutamate receptor, ionotropic, AMPA 1                                                       | receptor                                                                                                                 | 209793_at   | 1.195609808 | 0.0017351   | 475.5  | 121.9 | 568.5  | 171.9  |
| Pikfyve   | phosphoinositide kinase, FYVE finger containing                                              | Regulates the glutamate transporter                                                                                      | 213111_at   | 1.310251492 | 2.99E-05    | 205.7  | 69.5  | 269.6  | 74.0   |
| NBEA      | neurobeachin                                                                                 | Scaffolding protein involved in membrane trafficking and signaling                                                       | 221207_s_at | 1.177247591 | 0.00268495  | 628.2  | 299.3 | 739.6  | 302.9  |
| ITSN1     | intersectin 1 (SH3 domain protein)                                                           | Scaffolding protein that regulates vesicle trafficking and neurotransmission by participating in MAPK signaling pathways | 209297_at   | 1.510251052 | 0.000730752 | 159.8  | 94.2  | 241.4  | 106.3  |
| PRKCB     | protein kinase C, beta                                                                       | involved in signaling downstream of glutamate receptor activation                                                        | 207957_s_at | 1.242494185 | 0.0141362   | 1944.0 | 939.4 | 2415.4 | 962.4  |
| AFTPH     | aftiphilin                                                                                   | Enriched in synapses and believed to function in vesicle turnover                                                        | 217939_s_at | 1.136021361 | 0.0273739   | 586.3  | 88.9  | 666.0  | 119.7  |
| AKAP6     | A kinase (PRKA) anchor protein 6                                                             | Postsynaptic excitatory synapses; scaffolding proteins that ensure protein kinase target specificity                     | 205359_at   | 1.215891748 | 0.00541697  | 223.3  | 52.7  | 271.5  | 68.0   |
| ALDH5A1   | aldehyde dehydrogenase 5 family, member A1                                                   | Glutamine synthesis, glutamate metabolism                                                                                | 203608_at   | 1.266378599 | 8.01E-05    | 698.9  | 194.1 | 885.1  | 290.6  |
| GLS       | glutaminase                                                                                  | Glutamine/glutamate synthesis                                                                                            | 203157_s_at | 1.36392504  | 1.34E-06    | 260.7  | 130.1 | 355.6  | 139.4  |
| HOMER1    | homer homolog 1 (Drosophila)                                                                 | Part of the post-synaptic density                                                                                        | 213793_s_at | 1.168204332 | 0.00192353  | 732.0  | 313.7 | 855.2  | 194.6  |
| Jak2      | Janus kinase 2                                                                               | Can modulate activity of glutamate transporters                                                                          | 205842_s_at | 1.299821158 | 0.0305009   | 77.4   | 24.3  | 100.6  | 32.0   |
| phlda1    | pleckstrin homology-like domain, family A, member 1                                          | Part of the post-synaptic density                                                                                        | 217997_at   | 1.183115298 | 0.128618    | 433.9  | 90.0  | 513.3  | 134.9  |
| plekha1   | pleckstrin homology domain containing, family A (phosphoinositide binding specific) member 1 | Part of the post-synaptic density                                                                                        | 219024_at   | 1.188787491 | 0.00725253  | 118.6  | 46.6  | 141.0  | 51.8   |
| PLEKHA5   | pleckstrin homology domain containing, family A member 5                                     | Part of the post-synaptic density                                                                                        | 214989_x_at | 1.289713798 | 8.02E-07    | 453.5  | 205.9 | 584.9  | 211.4  |
| PPP1R12A  | protein phosphatase 1, regulatory (inhibitor) subunit 12A                                    | involved in DARPP32 signaling downstream of glutamate receptor activation                                                | 201602_s_at | 1.260153765 | 0.0440252   | 264.9  | 118.6 | 333.8  | 107.8  |
| PPP1R12A  | protein phosphatase 1, regulatory (inhibitor) subunit 12A                                    | involved in DARPP32 signaling downstream of glutamate receptor activation                                                | 201604_s_at | 1.438086589 | 0.00151884  | 93.1   | 45.4  | 133.8  | 57.6   |
| PRKACB    | protein kinase, cAMP-dependent, catalytic, beta                                              | involved in signaling downstream of glutamate receptor activation                                                        | 202742_s_at | 1.485478246 | 0.0268617   | 944.5  | 332.0 | 1403.0 | 722.4  |
| PRKCB     | protein kinase C, beta                                                                       | involved in signaling downstream of glutamate receptor activation                                                        | 209685_s_at | 1.305990326 | 0.0147041   | 1100.8 | 465.3 | 1437.6 | 620.9  |
| PSD3      | pleckstrin and Sec7 domain containing 3                                                      | Part of the post-synaptic density                                                                                        | 203355_s_at | 1.23652891  | 0.0336106   | 384.0  | 112.8 | 474.9  | 162.7  |
| Rab11fip2 | RAB11 family interacting protein 2 (class I)                                                 | involved in recycling of glutamate transporters                                                                          | 203884_s_at | 1.232237028 | 0.0100236   | 279.3  | 73.3  | 344.1  | 92.6   |
| STX7      | syntaxin 7                                                                                   | Part a presynaptic membrane complex that releases neurotransmitters from vesicles                                        | 212632_at   | 1.175290777 | 0.000133108 | 525.0  | 121.1 | 617.0  | 148.2  |

**Supplemental Table S6.** WGCNA analysis. Means of module eigengenes (ME) in control and heroin groups with p and FDR values.

| <b>Module</b> | <b>ME: Mean<br/>(Control)</b> | <b>ME: Mean<br/>(Heroin)</b> | <b>P</b>    | <b>FDR</b>  |
|---------------|-------------------------------|------------------------------|-------------|-------------|
| turquoise     | -0.06782162                   | 0.07105122                   | 0.000980476 | 0.00907793  |
| orange        | -0.070895165                  | 0.07427112                   | 0.001249632 | 0.027820049 |
| yellow        | 0.069764495                   | -0.07308661                  | 0.001918624 | 0.03623932  |
| darkgreen     | 0.064165704                   | -0.0672212                   | 0.004464288 | 0.042366086 |
| darkgrey      | -0.06305456                   | 0.06605715                   | 0.014723554 | 0.057396612 |
| greenyellow   | -0.054679703                  | 0.057283502                  | 0.015570099 | 0.0645047   |
| brown         | -0.0544336                    | 0.05702568                   | 0.015720095 | 0.06642123  |
| darkred       | -0.054894987                  | 0.057509035                  | 0.015901145 | 0.067237024 |
| lightcyan     | 0.058256924                   | -0.06103106                  | 0.020291066 | 0.07974015  |
| purple        | 0.0513953                     | -0.053842682                 | 0.023439059 | 0.08797327  |
| red           | -0.050776374                  | 0.053194292                  | 0.024768976 | 0.08830003  |
| grey60        | 0.038824543                   | -0.040673338                 | 0.09092399  | 0.21302246  |
| black         | 0.038207356                   | -0.04002675                  | 0.095492825 | 0.21973296  |
| royalblue     | -0.03649535                   | 0.038233224                  | 0.111575164 | 0.23111999  |
| darkturquoise | 0.035128392                   | -0.036801178                 | 0.12756357  | 0.23610274  |
| lightgreen    | 0.0347273                     | -0.036380976                 | 0.13026358  | 0.2466229   |
| lightyellow   | -0.03287303                   | 0.034438413                  | 0.15236562  | 0.25554046  |
| white         | 0.032399148                   | -0.03394197                  | 0.15861131  | 0.25991783  |
| skyblue       | 0.030406438                   | -0.031854365                 | 0.18607543  | 0.28400987  |
| tan           | -0.02993788                   | 0.031363495                  | 0.196988    | 0.2856326   |
| magenta       | 0.024661606                   | -0.025835969                 | 0.28582183  | 0.39470634  |
| darkorange    | -0.017637515                  | 0.0184774                    | 0.45368692  | 0.59804183  |
| grey          | -0.013198874                  | 0.013827395                  | 0.57154423  | 0.69391483  |
| midnightblue  | -0.01297216                   | 0.013589883                  | 0.57427436  | 0.72064275  |
| blue          | 0.011410135                   | -0.011953481                 | 0.62367165  | 0.7234591   |
| green         | -0.009361117                  | 0.009806885                  | 0.6852034   | 0.7623411   |
| salmon        | 0.008571279                   | -0.008979434                 | 0.70976585  | 0.7642653   |
| cyan          | 0.003298298                   | -0.00345536                  | 0.8882256   | 0.919948    |
| pink          | -0.00122521                   | 0.001283554                  | 0.95784897  | 0.95784897  |

**Supplemental Table S7.** WGCNA analysis. Estimated module membership for each gene using module eigengenes across all modules is shown. MM shows Pearson's correlation and p.MM shows corresponding p values.

**(see separate Excel file)**

**Supplemental References**

1. Sullivan SE, Whittard JD, Jacobs MM, Ren Y, Mazloom AR, Caputi FF, et al. (2013): ELK1 transcription factor linked to dysregulated striatal mu opioid receptor signaling network and OPRM1 polymorphism in human heroin abusers. *Biol Psychiatry*. 74:511-519.
2. Buenrostro JD, Wu B, Chang HY, Greenleaf WJ (2015): ATAC-seq: A Method for Assaying Chromatin Accessibility Genome-Wide. *Curr Protoc Mol Biol*. 109:21 29 21-29.
